# Supplementary material for: The kinetics of pre-mRNA splicing in the Drosophila genome and the influence of gene architecture
Source: eLife. 2017 Dec 27;6:e32537. doi: 10.7554/eLife.32537 (PMC5762160; doi:10.7554/eLife.32537)
Supplement: Supplementary file 1. — Column 1 – intron: Coordinates of introns, with chr:start:end:strand for the upstream flanking exon and the chr:start:end:strand for the downstream flanking exon separated with a ‘@’. Column 2 – gene: FlyBase gene symbol for parent gene. Column 3 – TPM: Gene expression values calculated with kallisto. Column 4 – PSI: MISO-derived Ψ values of intron in total time point (average across two replicates). Column 5 – intron_position: Position of intron relative to other introns in the transcript. Column 6 – intron_length: Length of intron (nucleotides). Column 7 – intron_type: Regulatory type of intron, where CI is constitutively spliced intron, RI is an annotated retained intron, and SEflanking is an intron that flanks a retained intron. Column 8 – ss5_maxEnt: maxEnt-derived splice site score for the 5’ splice site of the intron. Column 9 – ss3_maxEnt: maxEnt-derived splice site score for the 3’ splice site of the intron. Column 10 – contains_enhancer: Flag for whether the intron contains a transcriptional enhancer as defined by STARR-seq. Column 11 – upexon_length: Length of upstream exon (nucleotides). Column 12 – downexon_length: Length of downstream exon (nucleotides). Column 13 – three_length: Length of the region from the 3’ splice site of the intron to the polyA site of the transcript. Columns 14–16 – ie_count_[timepoint]: count of intron-exon junction reads for each of the labeling periods (summed across three replicates per labeling period). Columns 17–19 – ee_count_[timepoint]: count of exon-exon junction reads for each of the labeling periods (summed across three replicates per labeling period). Column 20 – halflife: Half-life of intron computed using the junction dynamic approach. Column 21 – halflife_error: Standard error around the half-life estimate, derived from bootstrapping the half-life across subsampled populations of reads. Column 22 – accuracy: percent of junction reads from unannotated, non-canonical splice sites within the intron [file elife-32537-supp1.xls]

## Sheet: SupplementaryTable1
Supplementary Table 1 (first 1000 lines only for space reasons)
intron	gene	TPM	PSI	intron_position	intron_length	intron_type	ss5_maxEnt	ss3_maxEnt	contains_enhancer	upexon_length	downexon_length	three_length	ie_count_5m	ie_count_10m	ie_count_20m	ee_count_5m	ee_count_10m	ee_count_20m	halflife	halflife_error	accuracy
chr3R:19825356:19825839:-@chr3R:19825902:19826502:-	FBgn0020647	104.442	0.01	8	63	RI	3.71	5.33	0	600	483	2579	92	57	30	108	245	353	1.60742	0.0284153	0.0075188
chr2R:18810155:18811887:-@chr2R:18811947:18812085:-	FBgn0010660	32.0264	0.04	2	60	CI	8.99	7.71	0	138	1732	5427	27	25	26	56	107	105	2.46953	0.0824851	0.0149254
chr3L:4259430:4259668:+@chr3L:4259744:4260057:+	FBgn0035519	46.3738	0.02	1	76	CI	11.81	6.68	0	238	313	1899	25	27	15	27	78	129	1.90781	0.0645995	0.0344828
chrX:14127138:14127296:-@chrX:14127454:14127592:-	FBgn0259166	29.978	0.09	2	158	SEflanking	7.76	NA	0	138	158	5203	10	14	7	26	40	54	2.03047	0.0820112	0.0344828
chr2L:10419190:10419302:+@chr2L:10419359:10419423:+	FBgn0032244	73.0584	0.13	1	57	CI	4.27	9.58	0	112	64	1253	43	40	31	32	37	88	4.09766	0.0483715	0.0277778
chr2L:10264549:10264633:+@chr2L:10264764:10264885:+	FBgn0032202	229.964	0.04	NA	131	CI	NA	NA	0	84	121	465	6	6	5	53	58	131	0.521094	0.107917	NA
chr2L:7693727:7694996:-@chr2L:7695073:7695971:-	FBgn0041182	38.0761	0.005	7	77	CI	8.31	5.45	0	898	1269	1269	1	3	0	20	47	38	0.214697	0.00356113	0.0285714
chrX:1587648:1589507:-@chrX:1589565:1589922:-	FBgn0023130	8.46203	0.095	1	58	CI	1.84	7.94	0	357	1859	1859	6	2	14	16	16	28	2.98203	0.287416	0.0434783
chrX:11506209:11507297:+@chrX:11507370:11509161:+	FBgn0030321	63.4359	0	2	73	CI	9.25	NA	0	1088	1791	1791	12	5	10	29	81	138	0.89707	0.0605561	0.0294118
chr3R:11666994:11667127:+@chr3R:11667179:11667768:+	FBgn0003483	9.12506	0.03	5	52	CI	10.65	6.97	0	133	589	2958	24	9	13	13	32	55	2.74063	0.123682	0.047619
chr2R:4619427:4619468:-@chr2R:4619665:4619910:-	FBgn0086784	24.3701	0.08	4	197	SEflanking	6.99	-0.93	0	245	41	2461	92	93	62	11	44	54	10.5656	0.241086	0.5
chr3R:12972443:12973073:-@chr3R:12973137:12973459:-	FBgn0038488	9.55746	0.05	2	64	CI	8.51	6.61	0	322	630	2876	22	11	7	37	53	72	1.52344	0.0696644	0.0277778
chr3L:9773636:9773797:+@chr3L:9773866:9774108:+	FBgn0036043	26.2021	0.015	7	69	CI	7.7	5.8	0	161	242	5700	7	0	2	15	13	29	0.997656	0.0483743	0.0625
chr2L:10411431:10411822:-@chr2L:10411881:10411961:-	FBgn0032242	99.5778	0.01	6	59	CI	8.88	8.01	0	80	391	1285	32	10	10	58	83	124	1.10664	0.023402	0.0166667
chr3R:22013029:22013436:-@chr3R:22013493:22013996:-	FBgn0039417	32.6092	0.02	NA	57	CI	NA	NA	0	503	407	696	13	14	7	13	30	61	1.95078	0.0428896	NA
chr2L:5203116:5203742:+@chr2L:5204451:5204592:+	FBgn0261836	14.069	0.065	26	709	RI	10.28	3.99	0	626	141	2551	26	10	5	9	27	28	2.66719	0.0822579	0.0833333
chr3L:8105594:8105814:+@chr3L:8106112:8106506:+	FBgn0027549	47.8411	0.06	NA	298	CI	NA	NA	0	220	394	394	41	27	23	18	47	114	2.67656	0.0424721	NA
chr3L:12198626:12198813:-@chr3L:12198876:12198991:-	FBgn0036266	12.7866	0.18	2	63	CI	0.11	6.73	0	115	187	1590	9	16	3	10	14	36	2.50859	0.126335	0.0833333
chr2L:16744124:16744385:+@chr2L:16744690:16745107:+	FBgn0032600	72.4474	0.025	3	305	RI	4.9	3.3	0	261	417	9014	43	37	22	31	82	123	3.59922	0.0965856	0.0333333
chr3R:6692251:6692415:-@chr3R:6692531:6692682:-	FBgn0037847	41.4611	0.015	NA	116	RI	NA	NA	0	151	164	3338	6	6	4	12	20	34	1.78828	0.0762935	NA
chr3R:6147187:6147304:-@chr3R:6147384:6147869:-	FBgn0266717	22.1496	0.025	16	80	CI	10.08	4.89	0	485	117	9543	31	16	4	51	66	74	2.02461	0.136929	0.0166667
chrX:15223043:15223900:+@chrX:15223965:15224082:+	FBgn0015926	13.896	0.145	3	65	CI	-0.08	NA	0	857	117	1070	29	39	25	9	9	26	9.4375	0.129347	0.1
chr3R:10485160:10485304:+@chr3R:10485466:10486032:+	FBgn0038251	25.6653	0.045	1	162	CI	4.79	8.79	0	144	566	1433	8	12	10	13	27	58	2.17734	0.0734996	0.0666667
chrX:8774325:8774433:-@chrX:8785595:8785840:-	FBgn0011661	576.504	0.115	1	11162	CI	3.73	NA	2	245	108	7388	52	26	17	463	645	779	0.488184	0.0183108	0.0499325
chrX:14978062:14978298:-@chrX:14978386:14978595:-	FBgn0030610	197.689	0.01	2	88	CI	10.1	NA	0	209	236	236	74	66	71	36	52	145	4.95312	0.0321057	0.0454545
chr2L:20356562:20356801:+@chr2L:20360013:20360433:+	FBgn0015803	37.6954	0.135	5	3212	RI	8.31	8.98	0	239	420	5241	5	4	3	16	39	59	1.01836	0.137333	0.0526316
chr3R:1831672:1831824:-@chr3R:1833759:1834295:-	FBgn0003261	305.337	0.1	1	1935	CI	7.8	0.93	1	536	152	5676	210	136	73	78	182	350	3.94219	0.0738879	0.0104167
chr3L:14023907:14024157:-@chr3L:14024489:14024806:-	FBgn0061515	163.073	0.09	1	332	CI	9.6	7.13	0	317	250	1478	42	33	27	35	81	132	2.475	0.0638403	0.0232558
chr2L:10425483:10426124:-@chr2L:10426494:10426627:-	FBgn0262601	262.576	0	1	370	CI	11.01	6.24	0	133	641	641	64	48	36	155	212	375	1.25195	0.0150856	0.00574713
chr3R:11051298:11051636:+@chr3R:11051688:11052248:+	FBgn0263979	149.875	0.005	1	52	CI	11.01	2.9	1	338	560	1598	75	47	40	60	126	148	2.78516	0.0274928	0.0147059
chr2R:11936831:11936914:+@chr2R:11936992:11937124:+	FBgn0034071	27.4655	0.015	9	78	CI	3.08	10.88	0	83	132	11348	16	10	3	47	66	81	1.49531	0.0806573	0.0263158
chr3R:6237074:6237289:-@chr3R:6237351:6237520:-	FBgn0024957	50.888	0.02	3	62	CI	10.67	6.1	0	169	215	2949	20	11	4	17	46	54	1.71875	0.0885216	0.0263158
chr3R:3745126:3745523:-@chr3R:3745587:3745833:-	FBgn0037531	8.12272	0.15	1	64	CI	0.39	9.29	0	246	397	3202	20	20	10	39	59	85	1.85527	0.0752309	0.0196078
chr2R:20398377:20400694:-@chr2R:20402059:20402520:-	FBgn0019886	38.096	0.005	NA	1365	CI	NA	NA	0	461	2317	3663	22	19	9	38	93	103	1.53438	0.0518907	NA
chr3R:22688202:22688285:-@chr3R:22688359:22688432:-	FBgn0051072	10.4603	0.135	2	74	CI	10.77	4.98	0	73	83	20101	7	8	8	35	29	54	2.90078	0.154222	0.0222222
chr3R:12089993:12091645:+@chr3R:12091710:12092015:+	FBgn0020407	8.07577	0.025	1	65	CI	10.22	4.77	0	1652	305	903	4	2	2	14	20	31	0.8	0.177681	0.0625
chr2R:6193243:6193475:+@chr2R:6193650:6194244:+	FBgn0033504	29.7033	0.015	NA	175	CI	NA	NA	0	232	594	879	12	7	2	6	19	32	1.74531	0.106522	NA
chr2R:11581880:11581922:+@chr2R:11581982:11582133:+	FBgn0053460	18.0953	0.09	2	60	CI	8.58	7.06	0	42	151	755	2	1	0	2	6	9	0.958398	0.0556004	0.25
chr3R:18439408:18439618:+@chr3R:18439683:18439845:+	FBgn0051159	12.6137	0.11	1	65	CI	10.67	7.44	0	210	162	2661	34	24	19	12	41	62	3.71719	0.160182	0.0625
chr3R:16418861:16419766:+@chr3R:16432003:16433389:+	FBgn0023097	14.2313	0.15	NA	12237	CI	NA	NA	0	905	1386	6259	21	8	5	17	59	51	2.01406	0.144108	NA
chr2L:10431944:10432178:+@chr2L:10432242:10432922:+	FBgn0004915	71.7493	0.005	NA	64	CI	NA	NA	0	234	680	874	21	10	16	37	86	130	1.25371	0.0287794	NA
chr2R:19431771:19432076:+@chr2R:19432148:19432424:+	FBgn0050185	82.9845	0.01	2	72	CI	6.64	2.58	0	305	276	276	104	76	42	39	86	167	3.27969	0.0417287	0.0227273
chr2R:20553681:20554334:-@chr2R:20554392:20554647:-	FBgn0260456	49.8883	0.005	2	58	CI	5.2	6.19	0	255	653	653	15	11	9	16	46	75	1.59922	0.0555609	0.0384615
chr2L:4994787:4994994:-@chr2L:4997114:4997381:-	FBgn0053113	157.729	0.14	1	2120	CI	8.55	9.26	0	267	207	2186	21	4	20	3	4	11	12.9313	0.779091	0.2
chr3L:17902583:17904307:-@chr3L:17904369:17904871:-	FBgn0036772	41.0869	0	3	62	CI	4.57	6.58	0	502	1724	1724	18	14	8	25	65	66	1.59902	0.0387107	0.03125
chr2R:10118997:10120408:-@chr2R:10120470:10120634:-	FBgn0261276	130.339	0	NA	62	CI	NA	NA	0	164	1411	2292	46	30	18	147	244	371	0.880664	0.0170984	NA
chr3R:18947529:18947666:+@chr3R:18947735:18947893:+	FBgn0039056	39.6975	0.01	3	69	CI	9.1	11.56	0	137	158	2204	29	34	35	41	71	149	2.69336	0.0644595	0.0217391
chr3L:11679825:11680659:+@chr3L:11680723:11681190:+	FBgn0036191	9.05799	0.04	3	64	RI	7.75	4.66	0	834	467	2532	8	9	5	11	17	19	2.97812	0.115433	0.0625
chr3R:20580371:20585252:+@chr3R:20585313:20585614:+	FBgn0000140	20.0027	0.035	4	61	CI	10.24	6.76	0	4881	301	922	17	19	8	18	35	38	2.57344	0.0849616	0.05
chr2R:14054849:14055027:+@chr2R:14055163:14055226:+	FBgn0260392	70.5213	0.055	2	136	RI	10.1	9.97	0	178	63	722	36	32	52	46	79	123	3.43438	0.0317623	0.0178571
chr3R:22809998:22810156:+@chr3R:22810217:22810358:+	FBgn0039467	85.9107	0.18	4	61	CI	7.61	6.38	0	158	141	1211	18	16	18	44	72	84	1.83828	0.0230633	0.0135135
chr2R:8765890:8766215:-@chr2R:8766702:8766727:-	FBgn0013305	250.353	0.17	2	487	RI	10.47	8.2	0	25	325	1616	55	67	51	48	55	106	5.025	0.068061	0.00961538
chr2R:7175150:7176065:-@chr2R:7176573:7177277:-	FBgn0033609	17.8092	0.09	1	508	CI	9.22	8.74	0	704	915	3412	47	75	37	2	11	13	25.1375	1.37412	0.0322581
chr3R:24536660:24536843:+@chr3R:24539665:24539942:+	FBgn0027655	8.85937	0.12	11	2822	CI	10.67	7.88	0	183	277	20746	19	4	3	5	3	6	11.1469	1.94713	0.0555556
chr3L:325880:325974:-@chr3L:326033:326358:-	FBgn0052343	19.7355	0.03	7	59	CI	9.55	-0.95	0	325	94	989	12	16	6	10	38	77	1.78789	0.0497171	0.0909091
chr2L:13445046:13445397:-@chr2L:13445480:13445651:-	FBgn0032524	22.7376	0.03	1	83	CI	10.29	5.1	0	171	351	1294	7	9	8	9	24	36	2.36797	0.0592688	0.0666667
chr3R:6135621:6136240:-@chr3R:6137184:6137335:-	FBgn0037807	105.648	0.025	1	944	CI	10.11	4.06	0	151	619	2712	49	34	33	92	107	163	2.2	0.0338674	0.00909091
chr2L:5548168:5548709:+@chr2L:5549017:5549419:+	FBgn0031717	32.2646	0.065	NA	308	CI	NA	NA	0	541	402	597	8	6	11	8	14	10	7.1375	0.152988	NA
chr3R:7720107:7720449:-@chr3R:7720508:7720770:-	FBgn0037963	6.86	0.015	14	59	RI	8.34	7.64	0	262	342	1215	2	1	0	7	5	19	0.713867	0.0593213	0.1
chrX:9570790:9571079:-@chrX:9571148:9575224:-	FBgn0261617	11.8833	0.025	5	69	CI	10.11	NA	0	4076	289	11604	11	2	2	66	109	125	0.595117	0.0823453	0.0120482
chrX:527935:528089:-@chrX:528158:529322:-	FBgn0020381	30.1972	0.015	NA	69	CI	NA	NA	0	1164	154	434	25	15	11	42	60	92	1.47637	0.0221128	NA
chr3R:13499908:13500545:-@chr3R:13500611:13500733:-	FBgn0038535	117.417	0	5	66	CI	9.31	11.27	0	122	637	1091	12	18	13	66	99	149	0.985742	0.0186851	0.0135135
chr2L:13217361:13217616:-@chr2L:13217676:13218520:-	FBgn0032485	32.7511	0.02	3	60	CI	7.51	6.14	0	844	255	1326	28	37	17	45	59	90	2.51094	0.0306228	0.0227273
chrX:15624185:15624506:+@chrX:15624570:15624735:+	FBgn0030674	17.7966	0.01	16	64	CI	9.07	NA	0	321	165	1398	34	24	18	43	101	97	1.93906	0.0337169	0.0217391
chr3R:1650755:1651166:+@chr3R:1651221:1651310:+	FBgn0037384	20.723	0.045	2	55	CI	5.57	7.91	0	411	89	1077	43	29	14	15	59	112	2.32227	0.0593402	0.0454545
chrX:12571770:12572089:+@chrX:12572367:12573735:+	FBgn0011837	45.4936	0.015	NA	278	CI	NA	NA	0	319	1368	4220	7	8	3	25	46	74	1.03887	0.0596773	NA
chr2R:18954796:18955364:+@chr2R:18955470:18955651:+	FBgn0021979	124.222	0.07	1	106	CI	5.18	-3.13	0	568	181	3928	3	4	8	12	16	12	4.24062	0.151374	0.0555556
chr3R:20179340:20180461:+@chr3R:20180515:20180602:+	FBgn0039187	27.8699	0.015	6	54	CI	9.65	6.16	0	1121	87	1448	25	21	18	18	57	62	2.88984	0.0485348	0.0454545
chr3R:1581386:1581989:-@chr3R:1582043:1582444:-	FBgn0266672	34.2621	0.025	6	54	RI	9.72	5.97	0	401	603	1335	25	26	15	31	73	91	2.0582	0.0708842	0.030303
chr2R:3347936:3348705:-@chr2R:3348761:3349848:-	FBgn0033177	32.5347	0.015	3	56	CI	9.82	3.08	0	1087	769	1515	36	27	30	24	97	157	2.24258	0.067018	0.03125
chr3L:20021345:20021478:-@chr3L:20021746:20021909:-	FBgn0036932	74.7708	0.05	2	268	RI	6.45	6.81	0	163	133	559	18	24	24	12	19	65	4.22813	0.0590838	0.0625
chrX:3770348:3770426:+@chrX:3770488:3771491:+	FBgn0028491	132.098	0.025	7	62	CI	8.57	NA	0	78	1003	3924	39	39	33	56	106	166	2.51016	0.0773652	0.0153846
chr3L:16835892:16835976:+@chr3L:16836067:16836132:+	FBgn0036666	140.003	0.05	2	91	RI	9.86	9.22	1	84	65	1618	39	31	19	46	68	108	2.32461	0.0544004	0.0192308
chr3L:2477690:2478076:-@chr3L:2478146:2478448:-	FBgn0035344	40.9069	0.035	1	70	CI	7.36	7	0	302	386	1817	76	45	36	17	74	94	4.1	0.055579	0.037037
chr3L:8180579:8180676:+@chr3L:8180913:8181680:+	FBgn0035850	33.4081	0.02	2	237	CI	10.74	10	0	97	767	3305	26	24	22	15	38	84	3.5168	0.0895231	0.05
chr3L:20488447:20488619:+@chr3L:20488725:20489175:+	FBgn0037001	186.27	0.005	NA	106	CI	NA	NA	0	172	450	1459	56	32	30	39	62	110	3.0543	0.0530608	NA
chr2L:6720396:6720942:-@chr2L:6720997:6721131:-	FBgn0025777	20.6248	0.03	NA	55	CI	NA	NA	0	134	546	1548	13	22	17	25	50	72	2.47148	0.032147	NA
chr3R:16361415:16362267:-@chr3R:16362916:16363185:-	FBgn0016917	107.537	0.025	8	649	CI	7.12	11.84	0	269	852	1222	37	7	11	74	156	212	0.787305	0.0166728	0.011236
chr3R:1621633:1621780:+@chr3R:1622151:1625716:+	FBgn0037379	17.7043	0.025	4	371	CI	10.08	9.17	0	147	3565	3565	31	18	24	61	64	100	2.38008	0.0476489	0.0131579
chrX:3858600:3858671:-@chrX:3858734:3858984:-	FBgn0029688	43.8653	0.04	2	63	CI	8.56	NA	0	250	71	9095	47	26	17	61	75	77	3.27734	0.14431	0.00884956
chr3R:5603764:5603918:+@chr3R:5604341:5604440:+	FBgn0261599	6491.65	0.105	NA	423	CI	NA	NA	0	154	99	909	159	135	86	1157	1023	1343	0.732422	0.00499867	NA
chrX:11702539:11704496:-@chrX:11704564:11704891:-	FBgn0030336	18.5566	0.02	7	68	CI	4.89	NA	0	327	1957	1957	9	5	2	32	68	75	0.625977	0.0343084	0.0277778
chr2R:9842422:9842549:+@chr2R:9842720:9843169:+	FBgn0050481	42.6938	0.015	2	171	CI	10.57	6.7	0	127	449	449	55	30	14	20	33	56	3.33047	0.0538679	0.0416667
chrX:15649380:15649595:-@chrX:15649852:15650025:-	FBgn0030685	33.6054	0.005	4	257	CI	11.08	NA	0	173	215	3888	5	1	2	41	73	89	0.344727	0.424349	0.0196078
chr3R:16930768:16932293:-@chr3R:16932358:16933475:-	FBgn0266674	21.6243	0.025	2	65	CI	4.07	11.75	0	1117	1525	1525	27	25	9	6	49	87	2.38359	0.0612575	0.0344828
chr3R:19985198:19985261:-@chr3R:19985370:19986408:-	FBgn0039157	9.9453	0.045	NA	109	CI	NA	NA	0	1038	63	4713	8	16	7	7	28	40	3.02578	0.301844	NA
chr2R:5177731:5178785:-@chr2R:5178842:5179070:-	FBgn0026326	30.5955	0.01	1	57	CI	7.4	0.94	0	228	1054	2323	19	28	14	54	57	91	2.09297	0.0170477	0.0151515
chr3R:11780305:11780405:+@chr3R:11780469:11780743:+	FBgn0013334	20.3009	0.03	5	64	CI	7.8	6.56	0	100	274	7377	11	8	9	15	36	46	2.59375	0.161247	0.04
chr3R:7234514:7234870:-@chr3R:7234932:7235326:-	FBgn0264694	154.016	0	2	62	CI	7.7	7.38	0	394	356	356	17	18	22	54	102	216	1.10117	0.0165961	0.0153846
chr3R:16927921:16928383:+@chr3R:16928445:16928640:+	FBgn0038855	39.3014	0.035	1	62	CI	6.6	8.09	0	462	195	2390	41	32	17	13	43	25	6.08437	0.226038	0.0714286
chrX:17039049:17039165:-@chrX:17040831:17041239:-	FBgn0002590	3818.18	0.01	NA	1666	CI	NA	NA	0	408	116	1544	36	34	40	490	538	773	0.486035	0.00448113	NA
chr3L:14038556:14038856:-@chr3L:14038911:14039735:-	FBgn0041161	6.4051	0.025	6	55	CI	8.07	2.08	0	824	300	2062	5	5	3	16	42	50	0.909961	0.066603	0.05
chr3L:21818065:21818177:+@chr3L:21818350:21819514:+	FBgn0037135	183.764	0.015	1	173	CI	8.28	7.37	0	112	1164	2606	70	82	70	48	82	129	5.45156	0.0814091	0.0163934
chr2L:5307565:5307912:+@chr2L:5308021:5311223:+	FBgn0016076	7.2976	0.02	NA	109	CI	NA	NA	0	347	3202	3202	14	9	6	31	48	84	1.29707	0.0501531	NA
chr3R:19976138:19977467:-@chr3R:19977568:19977687:-	FBgn0015765	52.6396	0.045	1	101	CI	11.08	7.63	0	119	1329	1329	43	24	24	44	77	131	2.12422	0.0466242	0.02
chr3L:3333119:3333692:-@chr3L:3333745:3333925:-	FBgn0035440	114.924	0.005	4	53	CI	6.45	6.76	0	180	573	573	38	33	21	49	92	124	1.98711	0.0320849	0.0204082
chr2R:13423960:13424084:+@chr2R:13424201:13424516:+	FBgn0034237	365.456	0.01	2	117	CI	4.51	6.43	0	124	315	2446	140	95	96	396	476	651	1.5373	0.0192792	0.0026178
chr2L:4844169:4844646:-@chr2L:4844712:4844772:-	FBgn0031637	17.6432	0.03	5	66	CI	6.43	4.95	0	60	477	3164	23	11	15	13	52	55	2.7793	0.130795	0.0434783
chr3R:8267149:8267330:+@chr3R:8270521:8270840:+	FBgn0086687	453.43	0.165	1	3191	CI	7.97	4.58	1	181	319	2817	23	30	17	79	138	233	1.20234	0.0381072	0.110294
chr3L:4325061:4325383:-@chr3L:4326984:4327170:-	FBgn0035533	50.9766	0.105	7	1601	RI	9.16	-3.33	0	186	322	2892	71	104	124	10	38	72	14.8625	0.32947	0.027027
chr3R:12971649:12971774:-@chr3R:12971842:12972385:-	FBgn0038488	9.55746	0.105	4	68	CI	4.37	0.37	0	543	125	1577	10	15	16	16	33	45	3.19531	0.110597	0.047619
chr2R:13629828:13629938:+@chr2R:13629995:13630318:+	FBgn0034271	12.1935	0.025	7	57	CI	4.88	7.7	0	110	323	1479	19	18	16	28	52	83	2.14844	0.049833	0.0277778
chrX:21192932:21193180:-@chrX:21194158:21195036:-	FBgn0029067	20.8182	0.08	1	978	CI	8.56	NA	0	878	248	2362	8	8	23	16	17	48	3.92891	0.102518	0.0909091
chr2R:9094250:9094496:+@chr2R:9094567:9094854:+	FBgn0033806	10.6294	0.055	1	71	CI	6.99	6.21	0	246	287	3407	12	11	11	23	36	48	2.37344	0.0818424	0.03125
chr2L:2973166:2973368:+@chr2L:2973429:2974858:+	FBgn0260639	40.5394	0.01	2	61	CI	10.47	4.6	0	202	1429	1429	13	10	13	13	29	39	2.97734	0.0828703	0.0526316
chr3L:235410:235514:-@chr3L:235579:236074:-	FBgn0000541	33.321	0.01	9	65	RI	11.34	3.7	0	495	104	1588	17	15	6	27	40	41	1.95547	0.0395674	0.0333333
chr2R:20149449:20149631:+@chr2R:20149687:20151004:+	FBgn0034997	88.2383	0.005	2	56	RI	10.13	-2.8	0	182	1317	3049	2	6	4	9	23	38	1.38945	0.059089	0.0714286
chr2R:12091947:12092259:-@chr2R:12092330:12092536:-	FBgn0034091	30.1097	0.015	5	71	RI	10.03	9.69	0	206	312	1425	7	2	2	47	91	127	0.307617	0.00960135	0.0169492
chr3L:20430354:20430975:+@chr3L:20431040:20431470:+	FBgn0036991	13.0812	0.01	NA	65	CI	NA	NA	0	621	430	430	9	6	8	15	31	52	1.52695	0.0333185	NA
chr2R:13424575:13426127:+@chr2R:13426199:13426647:+	FBgn0034237	365.456	0.005	NA	72	CI	NA	NA	0	1552	448	448	64	56	29	117	220	301	1.35625	0.0133599	NA
chr3R:10496222:10496564:-@chr3R:10497094:10497245:-	FBgn0265140	149.522	0.02	4	530	CI	6.43	12.66	0	151	342	5935	134	72	43	163	269	363	2.20234	0.045311	0.00990099
chr2L:19553976:19556092:+@chr2L:19556162:19556451:+	FBgn0041180	95.832	0.01	7	70	CI	10.75	6.71	0	2116	289	289	45	37	35	124	277	342	1.04492	0.0131028	0.00847458
chr2L:2740140:2740211:+@chr2L:2740389:2740473:+	FBgn0031450	55.9046	0.065	NA	178	CI	NA	NA	0	71	84	2988	41	25	27	81	163	319	1.30645	0.0273976	NA
chrX:7182400:7183297:-@chrX:7183539:7183711:-	FBgn0025549	24.573	0.115	NA	242	CI	NA	NA	0	172	897	897	19	18	4	7	30	40	2.27969	0.0725004	NA
chr3L:9330098:9330321:+@chr3L:9330554:9330760:+	FBgn0035975	32.143	0.09	4	233	RI	4.2	5.15	0	223	206	882	28	17	23	3	13	29	7.18281	0.195143	0.166667
chr2RHet:203349:203475:+@chr2RHet:207045:207864:+	FBgn0003256	139.708	0.16	NA	3570	CI	NA	NA	0	126	819	45596	76	39	34	332	434	484	3.05625	0.156628	NA
chrXHet:77098:77373:+@chrXHet:77432:77831:+	FBgn0003559	42.49	0.01	NA	59	CI	NA	NA	0	275	399	2817	33	28	22	65	126	157	1.69531	0.0271624	NA
chr2L:10201004:10201148:+@chr2L:10201230:10201528:+	FBgn0005593	5623.21	0.19	1	82	RI	8.54	10.58	1	144	298	1091	290	249	226	1801	1697	2404	0.925195	0.00339548	0.000548847
chr2L:12709375:12710225:-@chr2L:12710362:12712531:-	FBgn0032454	65.0482	0.015	NA	137	RI	NA	NA	0	2169	850	1433	36	28	28	34	78	142	2.31445	0.0384651	NA
chr4:157505:157793:+@chr4:157849:157958:+	FBgn0052000	46.0094	0.02	3	56	CI	8.07	0.37	0	288	109	5900	54	17	8	128	171	189	1.12344	0.0387533	0.00704225
chr3L:15001035:15001090:-@chr3L:15004293:15004864:-	FBgn0036463	77.7167	0.185	2	3203	CI	11.01	11.64	0	571	55	6752	22	5	10	194	291	355	0.435254	0.0359508	0.00904977
chr3R:7259894:7261021:-@chr3R:7261084:7261425:-	FBgn0037901	38.3938	0.01	NA	63	CI	NA	NA	0	341	1127	1811	15	12	5	53	49	75	1.14668	0.0260271	NA
chr3R:12901225:12901907:-@chr3R:12901967:12902224:-	FBgn0038475	6.16254	0.06	3	60	CI	8.66	-1	0	257	682	2243	30	22	10	14	45	59	2.6832	0.0821909	0.0555556
chrX:2225959:2226172:-@chrX:2227353:2228691:-	FBgn0044047	72.7384	0.035	1	1181	CI	10.74	9.97	1	1338	213	646	2	0	4	1	6	11	2.28281	0.128754	0.333333
chr3L:14025833:14025997:+@chr3L:14026057:14026783:+	FBgn0036402	45.4951	0.005	3	60	CI	3.64	2.82	0	164	726	1952	23	15	7	62	68	164	1.06914	0.0239958	0.0204082
chr3R:18555539:18555601:+@chr3R:18555669:18556598:+	FBgn0266409	50.8428	0.02	NA	68	CI	NA	NA	0	62	929	2415	8	8	5	32	61	91	0.877539	0.0303193	NA
chr3L:20232963:20233632:-@chr3L:20234219:20234618:-	FBgn0036958	31.0631	0.09	1	587	CI	3.93	6.52	0	399	669	7359	40	28	26	4	9	11	22.25	1.87323	0.0212766
chr3R:19584061:19584250:+@chr3R:19584497:19584640:+	FBgn0039111	50.5203	0.065	1	247	CI	8.46	3.58	0	189	143	831	26	19	45	16	22	93	4.63594	0.0640957	0.0434783
chr3R:19115953:19117150:-@chr3R:19117218:19117375:-	FBgn0003118	255.744	0.01	NA	68	CI	NA	NA	0	157	1197	1197	48	31	15	282	475	608	0.463379	0.0120259	NA
chr3L:16889508:16889699:+@chr3L:16889904:16890280:+	FBgn0261565	13.1216	0.12	3	205	CI	10.28	11.33	0	191	376	25683	1	3	0	5	3	4	3.99766	0.809582	0.166667
chr2R:5056361:5056736:-@chr2R:5056798:5057291:-	FBgn0015477	30.9523	0.005	18	62	CI	7.64	8.82	0	493	375	1468	28	13	8	32	80	79	1.43594	0.0536608	0.025
chr3R:20889112:20889372:+@chr3R:20889430:20889599:+	FBgn0266719	50.7011	0.01	12	58	RI	5	3.54	0	260	169	640	18	19	7	32	54	67	1.58184	0.0283771	0.0294118
chr3R:25723022:25723367:+@chr3R:25727906:25728953:+	FBgn0051038	8.45078	0.025	3	4539	CI	7.23	7.12	0	345	1047	1047	2	2	1	2	10	4	2.19219	0.262476	0.333333
chr2R:2912515:2912946:+@chr2R:2914489:2914662:+	FBgn0033127	85.9151	0.075	1	1543	CI	8.34	7.19	1	431	173	1098	26	13	15	17	37	67	2.48828	0.0621246	0.0526316
chr3R:1047354:1048868:-@chr3R:1048972:1049087:-	FBgn0037298	85.4121	0.08	1	104	CI	9.6	3.69	0	115	1514	1514	69	76	105	5	21	58	15.325	0.366687	0.0204082
chr2R:13332995:13333189:-@chr2R:13333256:13333424:-	FBgn0034219	25.2975	0.04	5	67	CI	1.5	11.13	0	168	194	499	31	14	10	14	46	43	2.44219	0.028763	0.0666667
chr3R:16999561:17001355:+@chr3R:17004000:17004121:+	FBgn0264357	46.0558	0.01	3	2645	SEflanking	9.11	7.8	1	1794	121	35991	19	12	24	79	106	99	4.10859	0.346689	0.0104167
chr3R:15709431:15709577:+@chr3R:15709918:15710817:+	FBgn0014006	15.0696	0.02	7	341	RI	8.57	11.24	0	146	899	1834	16	16	10	25	53	85	1.71953	0.0452482	0.0322581
chr3L:6252592:6253010:-@chr3L:6253081:6253536:-	FBgn0001258	114.075	0.005	3	71	CI	8.85	10.42	0	455	418	805	38	35	26	74	212	280	1.19082	0.0298273	0.0111111
chr2L:8433013:8433272:-@chr2L:8433415:8433598:-	FBgn0001137	23.5096	0.08	1	143	CI	7.19	8.27	0	183	259	2186	24	18	30	10	19	42	6.45937	0.200096	0.0625
chr2R:15370673:15370791:+@chr2R:15370854:15373191:+	FBgn0260934	78.6106	0.005	NA	63	CI	NA	NA	0	118	2337	2337	35	16	7	32	77	82	1.61719	0.0701186	NA
chr3L:4037523:4038579:-@chr3L:4038642:4038752:-	FBgn0035488	18.1177	0.015	3	63	CI	11.08	6.32	0	110	1056	1056	48	43	28	26	81	146	2.6332	0.05676	0.0294118
chr2R:8083579:8083941:-@chr2R:8083995:8084461:-	FBgn0033698	15.3367	0.035	5	54	CI	7.46	9.37	0	466	362	4062	20	25	8	33	53	51	2.44062	0.0848611	0.0238095
chr3L:20383368:20383493:+@chr3L:20383558:20383734:+	FBgn0011205	57.7757	0.175	3	65	CI	10.06	2.67	0	125	176	1455	50	45	19	61	117	143	1.96367	0.0370777	0.015625
chr2R:13433499:13433671:+@chr2R:13433745:13433905:+	FBgn0028382	56.5752	0.04	3	74	CI	7.31	9.8	0	172	160	160	36	31	42	31	39	85	4.43672	0.0278228	0.0277778
chr3R:25423141:25423195:+@chr3R:25423886:25424953:+	FBgn0086361	97.2417	0.02	5	691	CI	3.53	7.59	0	54	1067	18993	21	11	8	22	38	51	4.19688	0.371947	0.00909091
chr3R:27225940:27226910:+@chr3R:27226973:27227735:+	FBgn0019990	17.5856	0.01	NA	63	CI	NA	NA	0	970	762	762	29	14	11	29	69	94	1.54766	0.0286413	NA
chr2R:19799200:19799391:+@chr2R:19799711:19799844:+	FBgn0261794	117.617	0	4	320	CI	7.43	5.76	0	191	133	12878	100	70	44	36	65	75	8.70937	0.368063	0.0135135
chr3L:14036794:14038327:-@chr3L:14038389:14038499:-	FBgn0041161	6.4051	0.045	8	62	CI	8.72	5.37	0	110	1533	1533	4	3	2	8	17	27	1.18223	0.200406	0.0833333
chr2R:2822928:2823185:-@chr2R:2823246:2823700:-	FBgn0053558	15.7293	0.03	5	61	CI	9.73	3.51	0	454	257	10993	3	5	2	17	52	58	0.988672	0.135344	0.0526316
chr2R:4800110:4800692:-@chr2R:4800938:4801075:-	FBgn0003074	60.8922	0.04	NA	246	CI	NA	NA	0	137	582	2287	36	22	34	30	56	78	3.79531	0.125491	NA
chr3R:11623020:11623516:+@chr3R:11623809:11624758:+	FBgn0262527	32.4773	0.07	NA	293	CI	NA	NA	0	496	949	4015	7	9	6	5	8	16	4.82422	0.380683	NA
chrX:6979443:6979550:-@chrX:6979652:6979987:-	FBgn0264270	75.9373	0.005	NA	102	RI	NA	NA	0	335	107	10967	10	10	5	46	88	129	1.15117	0.0945863	NA
chr3R:14487538:14488829:-@chr3R:14488892:14489053:-	FBgn0261065	32.6624	0.01	2	63	CI	9.49	3.63	0	161	1291	1986	25	14	8	40	70	96	1.37656	0.0417454	0.0212766
chr2L:8942110:8942452:-@chr2L:8942509:8942655:-	FBgn0032077	47.2513	0.125	NA	57	CI	NA	NA	0	146	342	507	29	14	19	25	36	94	2.29375	0.0387479	NA
chr3L:5144515:5144804:-@chr3L:5144870:5145176:-	FBgn0263831	13.3198	0.02	2	66	CI	6.5	8.75	0	306	289	1855	10	8	6	7	18	22	2.99844	0.358642	0.0909091
chr3L:3588042:3588080:+@chr3L:3593329:3593546:+	FBgn0005640	34.7965	0.03	4	5249	CI	8.14	5.82	0	38	217	17192	17	9	2	36	45	63	2.25742	0.184488	0.0697674
chr2R:7875867:7876068:-@chr2R:7876128:7876292:-	FBgn0033672	49.2207	0.04	1	60	CI	9.39	2.55	0	164	201	2050	24	52	58	10	41	74	7.20312	0.112522	0.0294118
chr3R:1486647:1486970:+@chr3R:1487261:1487530:+	FBgn0046222	23.3529	0.135	NA	291	RI	NA	NA	0	323	269	3630	28	27	38	29	77	142	2.91953	0.113351	NA
chr3R:4390051:4390558:+@chr3R:4390620:4391954:+	FBgn0266916	22.3109	0.015	2	62	CI	4.58	5.04	0	507	1334	4350	22	17	10	39	62	75	1.95898	0.0534214	0.0192308
chr2R:13648445:13648894:+@chr2R:13649634:13649793:+	FBgn0027572	23.4089	0.065	1	740	CI	8.73	6.09	0	449	159	2412	14	14	9	19	59	76	1.70801	0.0703128	0.0416667
chr2R:11913418:11913572:-@chr2R:11913640:11913785:-	FBgn0034068	53.3222	0.015	8	68	CI	8.39	3.89	0	145	154	1439	50	30	19	23	58	75	3.04492	0.0982985	0.0285714
chr2R:7095750:7097362:+@chr2R:7097424:7098134:+	FBgn0003396	19.2893	0.01	2	62	CI	10.47	7	0	1612	710	7475	43	19	8	62	83	72	2.16289	0.11981	0.0123457
chr3R:5830132:5830164:-@chr3R:5830378:5834358:-	FBgn0053208	11.0014	0.18	15	214	CI	8.68	7.8	0	3980	32	2888	33	31	10	4	22	23	5.57344	0.303099	1
chr3L:3039579:3039818:+@chr3L:3039927:3040469:+	FBgn0035388	65.0163	0.01	5	109	RI	10.47	8.62	0	239	542	542	19	15	11	30	67	109	1.36934	0.0270523	0.0344828
chr3R:20697521:20697875:-@chr3R:20697941:20698133:-	FBgn0039240	20.3235	0.08	9	66	CI	7.36	8.88	0	192	354	951	14	11	15	6	17	41	3.78281	0.156306	0.1
chr3R:14234341:14234992:-@chr3R:14235054:14235158:-	FBgn0051122	17.3174	0.015	3	62	CI	9.72	9.27	0	104	651	3206	5	14	1	17	56	60	1.01992	0.02681	0.04
chr2R:6730579:6731016:-@chr2R:6735958:6736045:-	FBgn0050015	6.91605	0.105	5	4942	CI	10.47	6.35	0	87	437	4409	7	1	1	5	11	7	1.94453	0.763069	0.111111
chr2R:19762448:19762617:+@chr2R:19762674:19764965:+	FBgn0011236	32.4797	0.03	2	57	CI	7.46	8.41	0	169	2291	2291	56	37	23	40	107	134	2.35859	0.03149	0.0222222
chr3L:9893523:9893796:+@chr3L:9893861:9894118:+	FBgn0036059	57.0166	0.01	4	65	CI	1.48	8.38	0	273	257	2270	15	20	18	38	62	95	2.01094	0.0414957	0.025641
chr3R:1375315:1375484:-@chr3R:1375545:1376890:-	FBgn0014342	17.8546	0.015	NA	61	CI	NA	NA	0	1345	169	1647	24	15	12	7	26	41	3.47344	0.130632	NA
chr2L:3016441:3016865:-@chr2L:3016926:3017119:-	FBgn0031489	109.074	0.015	6	61	CI	11.08	7.9	0	193	424	424	4	7	2	17	42	79	0.688477	0.0133985	0.05
chr2R:20279652:20280726:-@chr2R:20281011:20281037:-	FBgn0035001	91.5521	0.05	13	285	CI	7.15	6.3	0	26	1074	1074	17	24	9	19	40	46	2.57422	0.0441274	0.0454545
chr3R:5084976:5085063:+@chr3R:5085354:5085425:+	FBgn0037670	39.3666	0.09	2	291	RI	8.83	7.05	0	87	71	768	7	13	8	24	32	59	1.68301	0.0244861	0.037037
chr2L:1386848:1387011:-@chr2L:1387107:1387353:-	FBgn0002543	6.47688	0.035	11	96	CI	9	6.09	0	246	163	6925	14	8	1	44	67	69	0.976562	0.0670067	0.0208333
chr2R:14068676:14069029:+@chr2R:14069090:14069147:+	FBgn0034314	13.1684	0.09	3	61	RI	7.62	7.59	0	353	57	934	12	8	9	9	38	53	1.90039	0.0870228	0.0769231
chrX:19539666:19539818:-@chrX:19539879:19540047:-	FBgn0031050	31.9849	0.01	1	61	CI	7.47	NA	0	168	152	1254	19	17	16	19	20	48	3.69922	0.104992	0.04
chrX:13890378:13890556:+@chrX:13892128:13893838:+	FBgn0000173	229.387	0.085	1	1572	CI	7.77	NA	0	178	1710	1710	67	66	62	74	128	186	3.29922	0.0330637	0.0210526
chr2R:13358072:13358391:+@chr2R:13358447:13358571:+	FBgn0022987	37.7916	0.01	NA	56	CI	NA	NA	0	319	124	4187	12	10	3	36	52	80	1.11602	0.035406	NA
chr3L:16582120:16582272:+@chr3L:16582347:16582630:+	FBgn0002283	48.6723	0.045	2	75	RI	-0.56	3.99	0	152	283	885	109	114	88	44	107	211	4.525	0.0511114	0.025
chr3R:8044454:8045136:-@chr3R:8045193:8045408:-	FBgn0037998	22.7809	0.045	1	57	CI	9.89	4.51	0	215	682	5622	16	31	15	19	40	40	4.50078	0.22552	0.047619
chr3L:11598536:11599298:-@chr3L:11599357:11599571:-	FBgn0036180	13.0467	0.025	NA	59	CI	NA	NA	0	214	762	762	11	16	11	5	18	38	3.56406	0.0561027	NA
chr2R:16500835:16500976:-@chr2R:16502011:16502438:-	FBgn0050147	8.13335	0.02	2	1035	CI	11.08	6.11	0	427	141	6590	10	4	6	7	14	19	3.6125	0.194115	0.111111
chr2R:18772937:18773334:-@chr2R:18773439:18773571:-	FBgn0034792	71.9051	0.06	NA	105	CI	NA	NA	0	132	397	3064	39	62	58	32	45	91	6.44375	0.105569	NA
chrX:18765667:18765906:+@chrX:18765971:18766134:+	FBgn0085430	6.64511	0.09	NA	65	CI	NA	NA	0	239	163	12137	16	6	4	33	40	59	1.93477	0.144042	NA
chr3R:15726154:15727532:-@chr3R:15728563:15729411:-	FBgn0038745	27.3577	0.045	1	1031	CI	10.45	9.39	0	848	1378	4438	40	28	17	30	26	59	4.30469	0.0935016	0.0322581
chr2R:4824268:4824608:-@chr2R:4824663:4825006:-	FBgn0033354	12.4543	0.02	9	55	CI	3.48	2.77	0	343	340	2527	8	5	2	6	22	25	1.71406	0.124772	0.1
chrX:20083650:20085420:-@chrX:20085799:20085975:-	FBgn0052823	12.9838	0.01	NA	379	CI	NA	NA	0	176	1770	1931	11	8	10	10	4	8	10.3781	0.243246	NA
chr3L:18819438:18820358:+@chr3L:18820456:18821288:+	FBgn0000261	198.021	0.01	2	98	CI	6.43	6.64	0	920	832	832	14	10	8	45	97	111	0.853516	0.0235923	0.0163934
chrX:15832791:15833273:-@chrX:15834433:15834484:-	FBgn0045073	106.102	0.05	1	1160	CI	9.25	NA	0	51	482	4745	13	13	8	123	160	211	0.604395	0.0230343	0.0165289
chr3L:19607624:19608049:-@chr3L:19608110:19609022:-	FBgn0260655	22.6595	0.03	6	61	CI	6.59	4.08	0	912	425	1522	20	12	7	14	40	39	2.21445	0.0741845	0.030303
chr2L:16823085:16823568:-@chr2L:16823640:16824499:-	FBgn0022213	65.8451	0.005	2	72	CI	11.78	6.5	0	859	483	2412	70	37	22	84	183	165	1.74727	0.0486423	0.00980392
chr2R:8063242:8064223:+@chr2R:8064283:8065021:+	FBgn0010621	400.022	0.005	2	60	CI	6.86	5.79	0	981	738	738	66	48	32	129	208	367	1.28145	0.0110237	0.00636943
chr3R:6157420:6157519:+@chr3R:6157578:6158417:+	FBgn0037809	27.7616	0.015	2	59	CI	0.7	8.23	0	99	839	839	15	7	18	15	40	85	1.93125	0.086882	0.05
chr2R:8049313:8049528:-@chr2R:8049585:8050216:-	FBgn0033688	65.2102	0.02	2	57	CI	9.65	3.61	0	631	215	7765	52	42	35	124	198	210	2.1793	0.062309	0.00591716
chr2L:4458980:4459207:-@chr2L:4459266:4459429:-	FBgn0053002	78.4299	0.005	2	59	CI	7.8	6.77	0	163	227	612	15	14	17	28	30	73	2.40703	0.0278275	0.0416667
chr3L:302585:302691:+@chr3L:302749:305292:+	FBgn0264707	14.6396	0.02	NA	58	CI	NA	NA	0	106	2543	2543	55	33	18	120	236	348	1.05957	0.0233623	NA
chr2L:2970714:2971054:-@chr2L:2971117:2971194:-	FBgn0004584	56.9948	0.01	2	63	CI	8.07	7.76	0	77	340	1281	9	3	9	25	45	87	0.969043	0.0391182	0.030303
chr2R:4985694:4985851:-@chr2R:4985908:4986030:-	FBgn0033375	26.3096	0.11	1	57	CI	6.44	5.42	0	122	157	1415	15	10	9	19	32	81	1.72324	0.0981745	0.0434783
chr3R:3729378:3729611:-@chr3R:3729676:3729846:-	FBgn0037530	85.512	0.01	11	65	RI	2.31	6.61	0	170	233	859	33	32	25	76	136	163	1.56445	0.0266284	0.0108696
chr2L:17404730:17404840:+@chr2L:17405356:17405422:+	FBgn0020503	24.9659	0.14	11	516	CI	6.17	4.28	0	110	66	4342	9	8	0	12	32	45	1.35469	0.1739	0.0769231
chr3R:12268966:12269099:+@chr3R:12269150:12270526:+	FBgn0038429	16.5459	0.085	NA	51	CI	NA	NA	0	133	1376	1582	5	11	6	3	12	47	2.74609	0.165871	NA
chr2L:21672290:21672469:-@chr2L:21672857:21673272:-	FBgn0032957	17.8608	0.015	2	388	CI	6.93	4.8	0	415	179	8663	33	38	43	46	88	144	3.80703	0.120796	0.0188679
chr2L:10485538:10485790:-@chr2L:10485855:10486081:-	FBgn0032258	52.227	0.01	7	65	CI	10.57	9.53	0	226	252	252	61	96	96	74	144	154	4.95937	0.0178265	0.0116279
chr3L:8110696:8111193:+@chr3L:8111257:8111433:+	FBgn0026252	142.053	0.04	3	64	CI	10.27	3.68	0	497	176	3422	33	21	22	70	131	187	1.48438	0.0347973	0.0206186
chrX:5656134:5656714:-@chrX:5658127:5658236:-	FBgn0013987	285.563	0.055	1	1413	CI	8.88	NA	0	109	580	2773	67	65	52	127	253	382	1.75684	0.0274955	0.00558659
chr3L:16056986:16057099:+@chr3L:16057327:16057417:+	FBgn0005536	41.9941	0.03	6	228	CI	10.44	5.26	0	113	90	17799	3	1	3	50	81	92	0.514648	1.29319	0.037037
chr3L:19795091:19795214:+@chr3L:19795266:19795374:+	FBgn0260874	27.2478	0.14	4	52	RI	4.94	-1.79	0	123	108	1261	28	38	26	14	20	45	6.11562	0.126512	0.0666667
chr3R:25635011:25635543:+@chr3R:25635615:25635925:+	FBgn0000247	22.8838	0.03	4	72	RI	7.77	6.65	0	532	310	5154	68	54	41	134	168	196	2.48086	0.060801	0.00675676
chr3R:9523557:9523760:-@chr3R:9523813:9524003:-	FBgn0028487	8.56147	0.1	5	53	RI	8.54	0.12	0	190	203	2775	9	14	7	6	14	24	3.97266	0.268435	0.142857
chr2R:5456490:5457661:-@chr2R:5457719:5460288:-	FBgn0085436	64.9922	0.015	7	58	CI	9.16	5.58	0	2569	1171	4010	27	19	4	70	128	108	1.05566	0.0439864	0.0121951
chr2R:13461126:13461219:+@chr2R:13461289:13461369:+	FBgn0016701	128.954	0.015	2	70	CI	5.98	2.72	0	93	80	1195	36	31	36	78	151	241	1.52969	0.0131307	0.01
chr3R:11060957:11061469:-@chr3R:11061522:11061681:-	FBgn0045035	17.3527	0.02	21	53	CI	10.57	4.44	0	159	512	3535	8	13	1	20	25	43	1.59531	0.0744109	0.037037
chr3R:3829698:3829900:+@chr3R:3829960:3830369:+	FBgn0037536	30.9425	0.005	NA	60	CI	NA	NA	0	202	409	1795	9	6	5	14	41	49	1.34375	0.0506515	NA
chr3R:22786786:22788173:-@chr3R:22788880:22789242:-	FBgn0039465	49.064	0.08	3	707	CI	8.73	11.09	0	362	1387	1387	28	29	20	15	23	43	5.02813	0.125072	0.0526316
chr2L:5204836:5204903:+@chr2L:5205104:5205389:+	FBgn0261836	14.069	0.01	28	201	SEflanking	4.06	3.54	0	67	285	1898	6	3	2	10	16	35	1.21211	0.0484508	0.0833333
chrX:9147950:9148072:+@chrX:9148146:9148957:+	FBgn0030114	6.81514	0.035	NA	74	CI	NA	NA	0	122	811	1840	3	5	4	6	6	14	3.3125	0.12358	NA
chrX:16574122:16574334:-@chrX:16574397:16574573:-	FBgn0000152	14.5508	0.045	7	63	CI	4.82	NA	0	176	212	212	16	16	11	13	30	59	2.39375	0.0381265	0.0666667
chr3R:15464623:15464691:-@chr3R:15464748:15465135:-	FBgn0038721	18.7094	0.035	2	57	CI	11	7.07	0	387	68	5551	8	6	3	42	55	61	0.889844	0.0450081	0.0196078
chr2R:588445:588766:-@chr2R:599319:599550:-	FBgn0026401	64.5597	0.175	11	10553	SEflanking	9.26	8.36	0	231	321	9589	16	19	5	68	145	152	1.13398	0.0554451	0.011236
chr2R:19259628:19259699:-@chr2R:19259766:19263476:-	FBgn0034854	28.4066	0.025	5	67	RI	10.1	11.34	0	3710	71	816	21	19	7	22	64	68	1.64219	0.0385079	0.0384615
chr2L:10437548:10437961:+@chr2L:10438041:10438239:+	FBgn0027052	53.2852	0.035	1	80	CI	5.3	3.71	0	413	198	1199	12	22	18	22	54	72	2.46445	0.0364502	0.0238095
chr3L:22732756:22733552:-@chr3L:22733619:22734488:-	FBgn0010830	19.8026	0.025	1	67	CI	11.81	8.98	0	869	796	1850	33	48	34	19	70	131	3.32109	0.0645753	0.047619
chr3R:26249696:26249767:+@chr3R:26249823:26250278:+	FBgn0039765	49.1292	0.01	1	56	CI	10.13	2.63	1	71	455	455	7	1	2	12	12	39	0.855273	0.0355602	0.0714286
chr2L:10399768:10400679:+@chr2L:10400735:10400869:+	FBgn0051716	64.0563	0.01	7	56	RI	8.35	9.21	0	911	134	2471	30	21	4	105	249	228	0.636328	0.0124594	0.00793651
chr2R:12477023:12477265:-@chr2R:12477322:12477579:-	FBgn0034142	36.7076	0.02	5	57	CI	2.37	5.5	0	257	242	242	9	2	4	5	29	37	1.325	0.0566164	0.125
chr2L:4393502:4393715:-@chr2L:4393773:4393876:-	FBgn0031600	72.8411	0.02	1	58	CI	7.77	5.4	0	103	213	945	45	24	33	64	108	184	1.79609	0.0296301	0.0126582
chr3R:27612490:27612749:+@chr3R:27612869:27613460:+	FBgn0005632	39.2296	0.015	15	120	CI	8.05	9.94	0	259	591	3534	20	10	8	49	57	74	1.43477	0.0431617	0.0212766
chrX:152015:152113:+@chrX:152175:152502:+	FBgn0000316	46.9678	0.05	6	62	CI	7.47	8.9	0	98	327	327	28	18	8	23	34	49	2.28047	0.0176938	0.04
chr2R:16879781:16879977:-@chr2R:16880042:16880219:-	FBgn0034569	31.1431	0.005	5	65	CI	8.54	9.04	0	177	196	196	4	12	4	14	37	88	1.06133	0.0229619	0.0588235
chr3L:3598360:3598621:+@chr3L:3600013:3600225:+	FBgn0005640	34.7965	0.06	8	1392	CI	9.6	4.72	0	261	212	10508	23	14	3	15	40	70	2.85781	0.2322	0.0454545
chr3R:5071130:5071316:-@chr3R:5071378:5071591:-	FBgn0260935	9.6701	0.1	1	62	CI	10.08	3.14	0	213	186	4837	21	29	21	35	74	97	2.69922	0.0643536	0.0172414
chr3L:20381769:20381947:+@chr3L:20383016:20383308:+	FBgn0011205	57.7757	0.05	NA	1069	RI	NA	NA	0	178	292	1997	66	45	53	38	72	120	4.30469	0.077636	NA
chr2L:19494560:19496869:+@chr2L:19496961:19497089:+	FBgn0002044	50.6467	0.025	NA	92	CI	NA	NA	0	2309	128	1017	68	33	31	76	172	221	1.62891	0.0174149	NA
chr2R:15555033:15555791:-@chr2R:15555859:15555983:-	FBgn0015949	68.1246	0.065	2	68	CI	8.83	9.66	0	124	758	4367	22	14	11	116	154	227	0.784766	0.0349546	0.00680272
chr3R:27878203:27878699:+@chr3R:27878968:27879277:+	FBgn0002780	313.386	0.02	NA	269	RI	NA	NA	0	496	309	1728	74	59	57	140	245	367	1.71602	0.0263164	NA
chr3R:24551326:24551463:+@chr3R:24551673:24551935:+	FBgn0027655	8.85937	0.045	24	210	CI	10.86	8.26	0	137	262	8738	11	2	1	10	23	35	1.7293	0.784193	0.0769231
chr3R:18370840:18371192:-@chr3R:18371407:18371505:-	FBgn0038984	71.0913	0.005	3	215	SEflanking	10.22	11.86	0	98	352	1777	15	12	14	46	65	109	1.3457	0.0362153	0.02
chrX:3379683:3380054:+@chrX:3380346:3381563:+	FBgn0029666	25.709	0.065	NA	292	CI	NA	NA	0	371	1217	4602	3	9	10	5	1	40	5.36875	0.185663	NA
chr3R:26707514:26708649:-@chr3R:26708705:26708793:-	FBgn0039809	16.467	0.06	2	56	CI	8.59	7.35	0	88	1135	1135	17	16	5	5	15	18	3.79219	0.0974642	0.142857
chr2R:5914344:5915148:+@chr2R:5915213:5916003:+	FBgn0033473	36.0447	0.03	1	65	CI	5.59	7.51	0	804	790	2960	33	26	25	28	53	134	2.7168	0.0763155	0.0285714
chr2R:12940774:12940923:+@chr2R:12940990:12941360:+	FBgn0034184	35.6057	0.015	5	67	CI	9.6	9.63	0	149	370	370	6	8	4	20	53	85	0.802344	0.0205832	0.0344828
chr2R:11935153:11935427:+@chr2R:11935489:11935571:+	FBgn0034071	27.4655	0.015	1	62	CI	9.8	9.4	0	274	82	12851	16	7	4	41	59	72	1.67715	0.144587	0.025
chrX:8973279:8974463:-@chrX:8974528:8974831:-	FBgn0030081	16.0631	0.01	2	65	CI	6.32	NA	0	303	1184	1607	5	11	5	20	21	31	2.03516	0.049835	0.04
chr3R:13470679:13470804:+@chr3R:13470873:13470984:+	FBgn0262794	59.4756	0.015	NA	69	CI	NA	NA	1	125	111	111	7	5	3	21	19	29	1.2625	0.0222224	NA
chrX:17030611:17031429:-@chrX:17031722:17031954:-	FBgn0002709	14.9295	0.02	8	293	CI	10.15	NA	0	232	818	1411	12	6	5	14	19	30	2.02266	0.0603196	0.0526316
chrX:21216647:21216979:+@chrX:21217349:21217885:+	FBgn0015379	58.6707	0.02	2	370	CI	9.81	NA	0	332	536	536	22	16	16	11	42	58	2.7875	0.0522549	0.0769231
chr3L:16112792:16112917:+@chr3L:16113014:16114751:+	FBgn0010280	49.1002	0.03	NA	97	CI	NA	NA	0	125	1737	1737	23	19	11	15	23	46	3.31055	0.0925531	NA
chrX:10675026:10676128:-@chrX:10676206:10676333:-	FBgn0003360	876.123	0.045	3	78	CI	9.22	NA	0	127	1102	1202	189	135	91	372	577	855	1.41562	0.00811492	0.00229358
chrX:4596468:4596624:+@chrX:4596857:4596925:+	FBgn0028325	73.2994	0.16	2	233	RI	7.99	NA	1	156	68	2441	15	36	42	14	31	55	6.825	0.200343	0.0277778
chr2R:8216969:8217195:+@chr2R:8217255:8218485:+	FBgn0264560	26.0773	0.005	6	60	CI	10.65	6.99	0	226	1230	4110	40	22	19	97	113	146	1.63164	0.0269283	0.00746269
chr3R:18288177:18288501:+@chr3R:18288570:18289008:+	FBgn0263351	85.5801	0.015	NA	69	CI	NA	NA	0	324	438	1755	74	59	40	79	111	186	2.69219	0.0247562	NA
chr3R:7836745:7836844:+@chr3R:7836905:7839981:+	FBgn0037979	15.7286	0.015	2	61	CI	11.01	6.57	0	99	3076	3876	24	18	10	24	53	54	2.51758	0.0833761	0.0333333
chr3L:1546092:1546306:+@chr3L:1550714:1551288:+	FBgn0041342	109.921	0.11	1	4408	CI	9.72	9.52	3	214	574	2790	120	79	104	139	274	419	2.54062	0.0338583	0.0104712
chr2R:6320780:6320970:+@chr2R:6321047:6321228:+	FBgn0262114	45.8321	0.015	4	77	CI	9.74	8.74	0	190	181	3039	10	8	3	39	84	94	0.729785	0.0399822	0.0178571
chr2R:19921748:19921955:+@chr2R:19922211:19924230:+	FBgn0034962	51.4144	0.02	1	256	CI	7.76	10.91	0	207	2019	2019	48	36	31	37	82	118	2.93281	0.0666584	0.0172414
chr2R:13405989:13406200:+@chr2R:13406258:13406532:+	FBgn0034232	94.1853	0.01	2	58	CI	9.54	7.53	0	211	274	274	20	20	23	18	47	95	2.52109	0.0482183	0.0454545
chr2R:13300344:13300548:+@chr2R:13300607:13301274:+	FBgn0016697	199.427	0.005	NA	59	CI	NA	NA	0	204	667	667	41	32	42	51	83	152	2.60547	0.0331293	NA
chr2L:3450358:3451243:+@chr2L:3451301:3451453:+	FBgn0031534	66.1935	0.005	3	58	RI	10.03	7.65	0	885	152	805	3	5	5	7	12	9	4.06094	0.115794	0.047619
chr2R:10142334:10142912:-@chr2R:10143174:10143220:-	FBgn0001220	311.737	0.005	2	262	CI	10.08	12.48	0	46	578	2809	62	62	60	97	169	235	2.63867	0.0406705	0.00862069
chr2R:3858279:3858687:-@chr2R:3858749:3859069:-	FBgn0033244	33.4077	0.01	NA	62	CI	NA	NA	0	320	408	3053	50	31	21	69	137	209	1.6627	0.0369498	NA
chr3R:18612728:18614239:+@chr3R:18614301:18614490:+	FBgn0039026	28.7422	0.015	3	62	CI	10.13	8.23	0	1511	189	5451	28	14	5	73	94	109	1.19727	0.0374465	0.0106383
chr3R:1314866:1314995:+@chr3R:1315089:1315211:+	FBgn0051550	48.4189	0.025	3	94	RI	10.47	9.28	0	129	122	122	12	5	8	9	10	29	2.83438	0.055358	0.1
chr2R:9751742:9753000:-@chr2R:9753566:9753631:-	FBgn0013733	18.9831	0.04	29	566	CI	6.84	7.53	0	65	1258	1258	9	9	8	12	28	28	2.57891	0.0873626	0.0588235
chr3L:1956459:1957445:-@chr3L:1957502:1957944:-	FBgn0265988	6.97069	0.06	8	57	CI	5.94	5.24	0	442	986	7139	31	19	7	80	107	72	1.6543	0.0690099	0.0103093
chr2R:3522264:3522505:+@chr2R:3522559:3522705:+	FBgn0263077	6.25501	0.045	4	54	RI	9.73	5.2	0	241	146	16733	18	10	4	16	18	14	5.6375	0.931574	0.0555556
chrX:11758684:11760344:-@chrX:11760410:11760694:-	FBgn0030344	20.8186	0.02	3	66	CI	10.77	NA	0	284	1660	1660	28	20	4	18	38	44	2.14883	0.0645721	0.0416667
chr3R:8450029:8450626:-@chr3R:8450688:8451949:-	FBgn0005671	140.663	0.005	NA	62	RI	NA	NA	0	1261	597	1142	34	17	12	72	122	172	1.04297	0.0203	NA
chr3R:15470748:15471810:+@chr3R:15471872:15472628:+	FBgn0038722	22.6837	0.01	1	62	CI	4.05	7.04	0	1062	756	756	27	16	20	37	96	161	1.42344	0.0245387	0.0232558
chr2L:12055085:12055359:-@chr2L:12055902:12055985:-	FBgn0028425	215.58	0.145	1	543	CI	7.3	7.57	2	83	274	3604	233	235	148	363	733	1143	2	0.0296005	0.00258398
chr2L:20926319:20926864:-@chr2L:20926921:20927091:-	FBgn0032907	25.7395	0.01	3	57	CI	5.28	9.74	0	170	545	545	11	14	7	12	33	57	1.89297	0.0383958	0.0625
chrX:17196872:17197423:+@chrX:17198108:17198403:+	FBgn0030838	89.0855	0.01	2	685	CI	9.68	NA	0	551	295	1400	10	9	4	37	84	122	0.689258	0.0212786	0.025641
chr2L:6490288:6490373:-@chr2L:6490439:6490629:-	FBgn0031822	78.842	0.02	2	66	RI	9.22	7.03	0	190	85	218	22	15	7	11	12	5	10.2312	0.35357	0.0555556
chr2R:15011610:15011922:-@chr2R:15012042:15012391:-	FBgn0034417	11.4068	0.015	2	120	CI	4.29	4.64	0	349	312	2186	4	5	0	8	11	21	1.32344	0.0851473	0.0714286
chr3R:5504442:5504698:+@chr3R:5504765:5505069:+	FBgn0037728	773.246	0	3	67	CI	10.45	6.2	0	256	304	615	125	73	52	385	559	859	0.855371	0.00795441	0.00243309
chr3L:655948:656230:+@chr3L:656293:656716:+	FBgn0035150	67.2152	0.03	3	63	CI	8.08	7.53	0	282	423	1678	34	24	4	36	58	50	1.81016	0.0387927	0.0147059
chr3R:4068640:4068886:-@chr3R:4068944:4069244:-	FBgn0037556	24.0841	0.02	2	58	CI	7.99	6.17	0	300	246	2417	8	2	5	26	55	73	0.772461	0.0395836	0.0294118
chrX:16276658:16276876:-@chrX:16276939:16277200:-	FBgn0030744	32.9076	0.02	3	63	RI	7.12	NA	0	261	218	889	14	5	9	27	31	76	1.30508	0.0260871	0.0277778
chrX:12466805:12467442:-@chrX:12467758:12467847:-	FBgn0030400	15.9952	0.01	NA	316	SEflanking	NA	NA	0	89	637	4240	7	7	2	3	22	28	2.24023	0.33121	NA
chr2L:2323351:2323449:-@chr2L:2330656:2330810:-	FBgn0031413	5.28083	0.175	2	7207	SEflanking	10.47	9.48	0	154	98	14688	6	2	0	17	8	17	1.80078	0.241979	0.0454545
chr2R:13633005:13633624:-@chr2R:13633683:13634881:-	FBgn0003545	30.2555	0.005	NA	59	CI	NA	NA	0	1198	619	619	1	2	1	16	39	63	0.2646	0.0129839	NA
chr2R:12993269:12993562:+@chr2R:12993622:12993708:+	FBgn0050456	32.9702	0.02	NA	60	CI	NA	NA	0	293	86	1425	11	8	9	24	109	96	1.01816	0.0390363	NA
chrX:6252935:6253912:+@chrX:6254025:6255356:+	FBgn0261955	133.844	0	2	113	RI	10.28	NA	0	977	1331	1331	24	45	19	72	169	198	1.32695	0.0197525	0.0116279
chr3R:8258255:8258794:-@chr3R:8258851:8259279:-	FBgn0029512	140.486	0.01	2	57	CI	5.76	8.61	0	428	539	539	35	36	53	28	63	133	3.66797	0.0407185	0.0294118
chrX:15748865:15749758:-@chrX:15749823:15751646:-	FBgn0002914	75.874	0.02	NA	65	CI	NA	NA	0	1823	893	893	27	21	21	28	46	88	2.59844	0.0407382	NA
chrX:8976970:8977198:+@chrX:8977274:8977516:+	FBgn0052707	13.6792	0.17	1	76	CI	7.75	NA	0	228	242	2626	13	14	9	12	17	44	3.1625	0.126379	0.0769231
chr2R:3718786:3718962:-@chr2R:3719025:3719124:-	FBgn0050382	678.123	0.04	2	63	CI	3.1	7.16	0	99	176	1044	93	79	94	351	615	927	1.00986	0.00941164	0.00122699
chrX:16521967:16524595:-@chrX:16526478:16526734:-	FBgn0026181	16.3897	0.035	4	1883	RI	9.6	NA	0	256	2628	6550	14	9	5	26	66	78	1.48457	0.111456	0.0263158
chr3L:4222191:4222368:+@chr3L:4222427:4224003:+	FBgn0263110	8.37155	0.025	24	59	CI	9.84	11.52	1	177	1576	1576	6	4	4	2	12	21	2.51094	0.134037	0.2
chrX:13457856:13458366:+@chrX:13469935:13470409:+	FBgn0086674	9.17343	0.01	NA	11569	CI	NA	NA	0	510	474	17322	7	4	1	29	84	93	1.04727	0.142283	NA
chrX:2165041:2167984:-@chrX:2168059:2168372:-	FBgn0023529	193.05	0	2	75	CI	9.66	6.84	0	313	2943	2943	48	30	29	134	182	223	1.42344	0.0223439	0.00689655
chr3R:17852170:17852788:-@chr3R:17852882:17853202:-	FBgn0038925	84.8475	0.01	1	94	CI	10.15	5.2	0	320	618	1091	7	9	4	30	39	41	1.17266	0.0334511	0.0192308
chr2L:11270298:11270644:+@chr2L:11270698:11271533:+	FBgn0040233	8.43188	0.12	3	54	CI	6.97	3.21	0	346	835	7148	27	24	9	18	26	37	4.43438	0.169145	0.0454545
chr2R:3568813:3568975:-@chr2R:3570031:3571018:-	FBgn0033212	75.5844	0.02	12	1056	CI	8.73	10.27	1	987	162	4930	27	15	9	18	69	91	2.1293	0.150046	0.0384615
chr3R:12266330:12266472:-@chr3R:12266530:12266678:-	FBgn0038427	32.3238	0.01	3	58	CI	3.52	7.28	0	148	142	3870	18	25	14	72	123	139	1.33574	0.0338513	0.0103093
chr3R:24151211:24151541:-@chr3R:24153881:24154005:-	FBgn0261618	97.3854	0.095	1	2340	CI	1.91	7.81	1	124	330	7657	257	131	102	182	259	211	5.25312	0.129392	0.00217865
chrX:13303847:13304301:-@chrX:13304375:13304550:-	FBgn0030485	13.2056	0.04	5	74	CI	8.99	NA	0	175	454	899	9	18	5	10	26	52	2.11719	0.0489637	0.0769231
chrX:11795382:11798714:-@chrX:11798777:11798980:-	FBgn0030354	22.2914	0.02	2	63	CI	8.56	NA	0	203	3332	4685	20	26	20	49	65	117	2.31016	0.0644019	0.0181818
chrX:19748469:19750020:+@chrX:19750121:19751505:+	FBgn0031078	44.6824	0.005	6	101	CI	7.77	NA	0	1551	1384	3291	45	27	15	67	129	125	1.71719	0.0384801	0.0142857
chr3R:464266:464561:-@chr3R:464740:465279:-	FBgn0037261	88.2508	0.015	4	179	RI	9.79	7.83	0	539	295	829	22	22	28	32	85	203	1.65508	0.0293346	0.0175439
chr3R:19580996:19581200:-@chr3R:19581261:19581595:-	FBgn0028475	42.7485	0	5	61	CI	8.02	6.71	0	334	204	855	14	4	4	50	78	114	0.56123	0.0137319	0.0163934
chrX:13279947:13280464:-@chrX:13280622:13280781:-	FBgn0026749	20.9914	0.06	3	158	CI	3.99	NA	0	159	517	517	39	54	41	9	18	54	7.61562	0.0617448	0.0833333
chr2R:3616521:3616663:-@chr2R:3616935:3617086:-	FBgn0042135	29.3954	0.05	3	272	CI	6.32	8.67	0	151	142	12351	8	2	1	36	40	50	0.884375	0.103804	0.0238095
chrX:15728156:15728404:-@chrX:15729358:15729523:-	FBgn0000319	156.571	0.175	1	954	CI	3.08	NA	1	165	248	6385	165	145	76	149	289	324	3.4875	0.0659898	0.00529101
chr3L:14025525:14025743:+@chr3L:14025833:14025997:+	FBgn0036402	45.4951	0.03	2	90	CI	8.57	6.3	0	218	164	2176	36	56	29	24	40	57	5.52344	0.101265	0.037037
chr3R:19077971:19078558:+@chr3R:19078614:19078991:+	FBgn0039066	46.8779	0.005	2	56	CI	9.55	9.94	0	587	377	2179	2	6	0	9	38	3	0.631641	0.0437128	0.0243902
chr2L:18965456:18965589:-@chr2L:18968253:18968744:-	FBgn0015772	12.4861	0.145	1	2664	CI	7.07	6.21	1	491	133	7857	19	13	9	19	58	111	2.22656	0.165147	0.0416667
chr2L:19498168:19498393:+@chr2L:19498460:19499093:+	FBgn0040268	29.9927	0.015	1	67	CI	7.47	11.08	0	225	633	3808	24	24	20	14	43	49	4.32031	0.11193	0.0344828
chr2L:2881382:2882511:-@chr2L:2882692:2883126:-	FBgn0024947	65.7853	0.02	NA	181	CI	NA	NA	0	434	1129	1807	34	25	15	25	40	48	3.47344	0.130636	NA
chr2R:266254:266409:-@chr2R:266469:266660:-	FBgn0260798	41.1011	0.01	9	60	CI	4.36	4.2	0	191	155	56609	13	17	8	46	40	43	7.65313	0.341813	0.0196078
chr3L:9503382:9503751:-@chr3L:9504156:9504401:-	FBgn0010408	3717.51	0.03	NA	405	CI	NA	NA	0	245	369	858	155	129	128	601	587	790	1.45332	0.00770821	NA
chr3R:19760286:19760654:+@chr3R:19760751:19761019:+	FBgn0039130	172.118	0.015	3	97	RI	6.51	9.26	0	368	268	935	36	52	39	15	80	142	3.27227	0.0709219	0.0243902
chr2R:1972352:1972536:-@chr2R:1972591:1972735:-	FBgn0033062	74.228	0.025	2	55	CI	11.37	2.68	0	144	184	4203	8	20	24	1	20	37	6.90469	0.297549	0.142857
chr3R:20924497:20924629:+@chr3R:20924918:20925182:+	FBgn0053096	24.2114	0.01	3	289	CI	8.88	3.71	0	132	264	2950	19	15	11	32	61	106	1.6375	0.0634052	0.025641
chr3L:21198680:21199726:+@chr3L:21200536:21201192:+	FBgn0037057	141.812	0.025	NA	810	CI	NA	NA	0	1046	656	656	115	98	60	130	315	555	1.65234	0.01077	NA
chr2L:18539523:18539673:-@chr2L:18540629:18540768:-	FBgn0085370	38.5196	0.025	6	956	CI	9.72	9.44	0	139	150	7648	78	52	47	84	190	232	2.91875	0.134128	0.0272727
chr3R:19955646:19955790:-@chr3R:19955844:19955977:-	FBgn0039153	20.4246	0.02	1	54	CI	8.83	8.11	0	133	144	2019	16	19	8	23	38	45	2.39297	0.0742014	0.0294118
chr3L:258350:258395:+@chr3L:258451:258763:+	FBgn0035120	105.054	0.11	1	56	CI	7.55	5.46	0	45	312	646	59	70	120	79	108	214	4.60547	0.0199352	0.0128205
chr2R:2541622:2542014:+@chr2R:2542069:2542615:+	FBgn0050443	24.5656	0.01	3	55	RI	6.6	6.08	0	392	546	703	6	6	4	5	28	51	1.43555	0.0894983	0.1
chr3L:7322232:7322463:+@chr3L:7322529:7322788:+	FBgn0259203	77.8252	0.01	NA	66	CI	NA	NA	0	231	259	4042	26	22	17	39	57	76	2.67188	0.0790832	NA
chr2L:5984719:5984942:+@chr2L:5985026:5985220:+	FBgn0001942	1620.75	0.02	4	84	CI	9.66	10.31	0	223	194	883	194	208	164	1262	1535	2245	0.793945	0.00239465	0.00135044
chr3R:4543571:4544093:+@chr3R:4545526:4547042:+	FBgn0037614	8.80177	0.08	NA	1433	CI	NA	NA	0	522	1516	1516	35	15	6	15	51	91	1.77695	0.0710918	NA
chr3L:2593865:2594465:+@chr3L:2594522:2595590:+	FBgn0016794	74.2253	0.015	6	57	RI	10.47	4.49	0	600	1068	1068	80	55	28	155	377	541	0.994727	0.0112213	0.00598802
chr3R:13521645:13521872:-@chr3R:13522092:13522308:-	FBgn0261885	36.4778	0.075	10	220	RI	10.86	-5.26	0	216	227	8332	36	25	12	1	4	7	20.4	2.00876	0.0149254
chr2L:6791518:6791637:-@chr2L:6791701:6791841:-	FBgn0015777	62.1921	0.01	2	64	RI	10.67	8.16	0	140	119	1867	9	7	4	28	42	42	1.16191	0.0288901	0.027027
chr3L:19908151:19910213:+@chr3L:19910283:19911260:+	FBgn0028695	72.2589	0.005	1	70	CI	8.99	6.14	0	2062	977	977	24	9	15	48	80	150	1.12187	0.0286064	0.016129
chr3R:17404519:17405094:-@chr3R:17405192:17406410:-	FBgn0013984	6.29507	0.055	3	98	CI	7.69	5.4	0	1218	575	9124	13	8	0	23	32	28	1.65156	0.202184	0.0333333
chr2L:18535361:18535528:-@chr2L:18535586:18535672:-	FBgn0085370	38.5196	0.01	11	58	CI	10.22	5.47	0	86	167	3503	16	13	2	173	308	348	0.288379	0.00830276	0.00425532
chrX:13636082:13636274:-@chrX:13636349:13637767:-	FBgn0001612	6.98517	0.07	2	75	RI	8.95	NA	0	1418	192	5671	14	5	4	20	45	38	1.6627	0.115725	0.0344828
chr2R:19936946:19937820:+@chr2R:19937886:19938129:+	FBgn0003353	10.742	0.03	3	66	CI	7.14	2.55	0	874	243	2672	1	3	0	5	9	11	0.945508	0.0356113	0.166667
chr2L:5273827:5275780:-@chr2L:5276512:5276731:-	FBgn0000228	12.3703	0.015	NA	732	CI	NA	NA	0	219	1953	4052	7	12	3	14	19	36	2.19766	0.146588	NA
chr2R:17997711:17997865:-@chr2R:17998051:17998443:-	FBgn0243516	26.2302	0.05	5	186	SEflanking	7.48	5.53	0	392	154	4253	35	24	10	16	52	41	3.38828	0.232959	0.0555556
chrX:10390823:10391080:-@chrX:10391147:10392178:-	FBgn0085443	28.3755	0.02	8	67	CI	9.26	NA	0	1031	257	6978	30	18	3	83	179	211	0.979297	0.0431	0.00961538
chr2L:19443631:19443851:-@chr2L:19443912:19444050:-	FBgn0024230	18.6908	0.08	3	61	RI	3.34	7.61	0	138	220	1018	26	25	18	15	27	62	3.60469	0.0720111	0.0555556
chr3R:19870080:19870988:-@chr3R:19871160:19872210:-	FBgn0005649	155.685	0.045	NA	172	CI	NA	NA	0	1050	908	2210	56	33	23	158	321	492	0.858203	0.0160503	NA
chr3L:18107384:18107857:+@chr3L:18107923:18108379:+	FBgn0052195	5.42459	0.035	NA	66	CI	NA	NA	0	473	456	4327	4	3	1	2	14	2	4.15234	1.07426	NA
chr2R:3293543:3293635:-@chr2R:3293711:3295324:-	FBgn0033166	30.3171	0.02	NA	76	CI	NA	NA	0	1613	92	9280	38	17	18	44	56	64	3.58789	0.227162	NA
chr2L:20415173:20416106:-@chr2L:20416164:20416918:-	FBgn0032858	19.1734	0.04	NA	58	CI	NA	NA	0	754	933	933	12	22	17	14	33	51	3.4	0.0558553	NA
chrX:16337526:16338009:+@chrX:16338074:16338359:+	FBgn0030753	34.0453	0.01	2	65	CI	8.56	NA	0	483	285	1326	15	7	9	40	78	125	0.900977	0.0459692	0.0222222
chr3R:20345662:20345809:+@chr3R:20346065:20348053:+	FBgn0003134	91.1694	0.005	NA	256	CI	NA	NA	0	147	1988	1988	8	8	5	66	109	179	0.470801	0.0210862	NA
chr3R:16415810:16416492:+@chr3R:16416551:16416762:+	FBgn0038810	49.1512	0.02	3	59	CI	5.26	8.36	0	682	211	211	12	12	24	14	42	100	2.19336	0.03125	0.0555556
chr3R:27281770:27282033:+@chr3R:27282096:27282498:+	FBgn0261988	52.2736	0.02	11	63	CI	7.81	7.52	0	263	402	1499	36	25	8	48	97	140	1.36797	0.0239037	0.0222222
chr2R:19285388:19286466:-@chr2R:19286527:19286738:-	FBgn0034859	10.2111	0.035	5	61	CI	-1.01	7.69	0	211	1078	2173	11	4	7	2	12	13	4.5625	0.163058	0.25
chr3L:7963688:7963842:+@chr3L:7964042:7965549:+	FBgn0010406	67.6791	0	1	200	CI	10.67	6.87	0	154	1507	1507	15	12	7	40	48	68	1.37344	0.0302348	0.0212766
chr2L:6923784:6924400:+@chr2L:6924685:6928675:+	FBgn0004838	277.584	0.005	NA	285	CI	NA	NA	0	616	3990	7372	43	28	48	184	258	436	1.34609	0.0310401	NA
chr3L:19836294:19836600:+@chr3L:19836665:19838044:+	FBgn0001324	31.9337	0.005	7	65	CI	8.46	8.66	0	306	1379	1379	15	11	4	9	26	32	2.16211	0.0657049	0.0714286
chr3L:21328315:21328528:+@chr3L:21328593:21330154:+	FBgn0037073	47.1223	0.01	1	65	CI	9.79	7.34	1	213	1561	2739	69	62	45	50	94	105	4.34453	0.084255	0.0175439
chrX:519575:520395:+@chrX:520537:520853:+	FBgn0025635	7.36968	0.025	NA	142	CI	NA	NA	0	820	316	1512	16	10	9	12	30	46	2.33555	0.0736082	NA
chr3R:7616150:7617743:-@chr3R:7617806:7619376:-	FBgn0025802	12.6349	0.01	6	63	CI	8.84	7.22	0	1570	1593	2728	13	5	8	40	79	58	1.16855	0.0634116	0.0222222
chr2L:12691363:12691502:-@chr2L:12691565:12692217:-	FBgn0032444	356.676	0.005	2	63	RI	7.77	2	0	652	139	1166	62	70	53	124	180	285	2.07266	0.0192511	0.00549451
chr2L:2579201:2579426:-@chr2L:2579483:2579567:-	FBgn0031436	168.368	0	NA	57	CI	NA	NA	0	84	225	225	18	12	8	67	66	95	0.992383	0.0179631	NA
chrX:8469384:8469523:+@chrX:8477574:8478288:+	FBgn0030052	136.025	0.045	2	8051	SEflanking	10.67	NA	2	139	714	4987	41	13	8	53	110	152	1.41191	0.0665032	0.0137931
chr2L:8177779:8178397:+@chr2L:8178459:8178951:+	FBgn0264953	27.1203	0.015	11	62	CI	7.65	6.5	0	618	492	11678	23	17	10	68	126	170	1.58867	0.0791131	0.0103093
chrX:2342819:2343360:+@chrX:2343423:2344583:+	FBgn0004050	33.399	0.015	2	63	CI	8.72	5.81	0	541	1160	1160	86	53	36	12	44	70	5.44062	0.104137	0.0714286
chr2R:11976412:11976543:-@chr2R:11976597:11976791:-	FBgn0034072	27.7534	0.015	3	54	CI	8.54	5.4	0	194	131	7862	5	8	1	21	41	31	1.21211	0.131642	0.037037
chr2L:8186738:8186884:+@chr2L:8186948:8187092:+	FBgn0264953	27.1203	0.01	23	64	CI	9.35	8.01	0	146	144	3189	7	4	1	76	100	137	0.283643	0.0204151	0.0121951
chr3L:12206048:12206397:-@chr3L:12206454:12206575:-	FBgn0260941	10.8399	0.03	NA	57	CI	NA	NA	0	121	349	7059	2	2	0	2	13	18	1.54023	0.471346	NA
chrX:1272918:1273405:-@chrX:1274171:1274513:-	FBgn0024986	67.3346	0.05	1	766	CI	10.47	10.65	1	342	487	487	26	36	27	19	43	64	4.14766	0.0467509	0.0454545
chr2L:12426631:12427387:-@chr2L:12427469:12427709:-	FBgn0032429	147.146	0.03	NA	82	CI	NA	NA	0	240	756	756	52	41	52	41	114	223	2.45781	0.0274484	NA
chr2R:19976127:19976401:+@chr2R:19976465:19976790:+	FBgn0086129	47.2285	0.015	NA	64	CI	NA	NA	0	274	325	3072	45	38	31	54	155	178	2.1043	0.0495228	NA
chrX:14825835:14826018:+@chrX:14826081:14827046:+	FBgn0264078	75.7042	0	NA	63	CI	NA	NA	0	183	965	1898	10	7	6	27	53	55	1.18945	0.0495795	NA
chr2R:6531311:6531467:-@chr2R:6531760:6532659:-	FBgn0033539	36.3108	0.015	2	293	RI	10.49	5.53	0	899	156	2144	45	27	16	28	62	92	2.53672	0.0562958	0.0285714
chr3R:7041138:7041346:-@chr3R:7041415:7041691:-	FBgn0086472	8306.56	0.07	2	69	CI	9.15	11.42	0	276	208	596	462	425	519	929	764	1154	3.73984	0.00951466	0.000972763
chr3R:16910075:16910198:-@chr3R:16910260:16910376:-	FBgn0038853	10.012	0.02	11	62	CI	6.32	10.12	0	116	123	1433	6	3	5	15	43	40	1.10312	0.189004	0.05
chr3R:26633070:26633389:+@chr3R:26633456:26633700:+	FBgn0039802	210.663	0.025	2	67	CI	4.69	5.64	0	319	244	244	10	19	7	57	90	140	0.818555	0.00783596	0.0140845
chr3LHet:600380:601061:-@chr3LHet:601118:601294:-	FBgn0040020	74.8812	0.015	NA	57	CI	NA	NA	0	176	681	681	27	37	19	57	131	287	1.24766	0.0163985	NA
chr2R:20409397:20412065:-@chr2R:20412297:20413174:-	FBgn0035016	27.8326	0.005	2	232	CI	10.75	9.07	0	877	2668	2668	5	2	3	10	16	39	1.17969	0.280225	0.0769231
chrX:2526638:2526884:+@chrX:2526945:2527386:+	FBgn0267350	18.3908	0.01	9	61	RI	5.56	NA	0	246	441	760	14	3	6	17	36	60	1.17852	0.0369535	0.047619
chr2R:15360945:15361059:+@chr2R:15361118:15361245:+	FBgn0260934	78.6106	0	9	59	CI	8.46	3.1	0	114	127	12073	28	27	10	42	108	229	2.28437	0.171543	0.0163934
chr3R:4140506:4141085:-@chr3R:4141144:4142135:-	FBgn0037574	15.3519	0.025	2	59	CI	5.3	7.42	0	991	579	579	73	54	60	26	63	70	6.84531	0.0848592	0.0227273
chrX:9170362:9170464:-@chrX:9170527:9171417:-	FBgn0040236	16.1205	0.01	7	63	CI	7.35	NA	0	890	102	1113	13	4	2	28	50	29	0.909766	0.0338043	0.0277778
chr2L:21310866:21311032:+@chr2L:21311753:21312043:+	FBgn0000370	617.94	0.105	1	721	CI	8.4	7.98	1	166	290	7774	135	79	66	610	774	1071	1.08887	0.0128765	0.00119904
chr4:160896:162753:+@chr4:162826:163749:+	FBgn0052000	46.0094	0.03	8	73	CI	7.15	7.65	0	1857	923	923	53	36	21	14	38	41	5.06094	0.0929529	0.0454545
chr3R:25637978:25638211:+@chr3R:25638268:25638720:+	FBgn0000247	22.8838	0.02	13	57	CI	8.62	5.63	0	233	452	2501	87	43	28	55	97	130	2.81719	0.0628912	0.0153846
chrX:8315398:8315688:+@chrX:8317217:8317608:+	FBgn0261793	14.9809	0.105	1	1529	CI	10.12	NA	1	290	391	9827	12	12	14	8	10	4	22.35	3.06422	0.0588235
chr3R:27617036:27617207:-@chr3R:27617272:27617459:-	FBgn0039877	25.3157	0.005	6	65	CI	6.42	7.48	0	187	171	893	6	8	4	13	29	57	1.26758	0.0365697	0.0588235
chr2R:2539494:2539637:+@chr2R:2539693:2540347:+	FBgn0029131	41.4273	0.01	2	56	CI	8.2	6.5	0	143	654	654	4	7	3	18	29	20	1.39844	0.0388322	0.0454545
chr3R:16939668:16939789:+@chr3R:16940475:16940823:+	FBgn0015790	472.107	0.02	3	686	SEflanking	10.03	7.12	0	121	348	1393	104	79	68	142	213	364	2.17422	0.0226602	0.00649351
chrX:18413348:18413968:+@chrX:18414022:18414478:+	FBgn0027087	120.432	0.01	5	54	CI	9.79	NA	0	620	456	456	11	9	5	14	25	58	1.56992	0.0356534	0.0625
chr2R:13461440:13461772:+@chr2R:13461836:13462240:+	FBgn0016701	128.954	0.01	4	64	RI	5.11	9.69	0	332	404	648	64	43	34	69	111	201	2.08672	0.0294278	0.016129
chr3R:23790707:23792209:+@chr3R:23792275:23792680:+	FBgn0039566	32.4317	0.01	6	66	RI	10.86	7.65	0	1502	405	405	4	7	5	17	23	36	1.4584	0.0216462	0.04
chr2L:17409091:17409299:+@chr2L:17409359:17409698:+	FBgn0020503	24.9659	0.04	16	60	CI	9.25	7.92	0	208	339	339	14	2	3	9	21	45	1.18711	0.0543611	0.0833333
chr3L:7921017:7921217:-@chr3L:7921284:7921504:-	FBgn0024187	11.0804	0.015	12	67	CI	8.31	7.99	0	220	200	11467	12	7	7	19	54	57	2.28633	0.220961	0.0416667
chr3L:593246:593503:+@chr3L:593566:593660:+	FBgn0035145	42.0561	0.05	1	63	CI	10.67	5.11	0	257	94	5673	89	80	56	201	257	258	2.49609	0.0455168	0.00469484
chr3L:9363865:9363916:-@chr3L:9364004:9364140:-	FBgn0011769	31.1749	0.015	NA	88	CI	NA	NA	0	136	51	621	10	7	12	9	26	49	2.29609	0.0770761	NA
chr2L:20753174:20754365:+@chr2L:20754431:20754655:+	FBgn0032882	28.0023	0.015	3	66	CI	6.97	3.73	0	1191	224	224	32	22	28	17	50	94	2.94453	0.0473533	0.0555556
chr3R:6148493:6149918:-@chr3R:6150008:6150131:-	FBgn0266717	22.1496	0.02	12	90	CI	8.31	6.24	0	123	1425	12157	34	17	9	78	97	77	2.22422	0.128928	0.0111111
chr3L:17536605:17536712:+@chr3L:17536864:17537101:+	FBgn0259174	41.5525	0.055	13	152	SEflanking	2.09	7.88	0	107	237	2896	16	11	16	19	44	67	2.41211	0.0807495	0.037037
chr3L:15963182:15964333:-@chr3L:15964394:15965185:-	FBgn0000212	44.09	0.005	5	61	CI	8.83	5.93	0	791	1151	1151	15	5	6	40	77	79	0.852344	0.0254994	0.0208333
chrX:7807522:7807833:+@chrX:7808296:7808468:+	FBgn0029976	9.2543	0.025	4	463	CI	10.07	NA	0	311	172	4181	3	7	1	12	12	23	1.71055	0.0844385	0.0666667
chr3R:3949281:3949789:+@chr3R:3949852:3950487:+	FBgn0037549	145.119	0.005	2	63	CI	2.73	2.82	0	508	635	1143	82	89	55	105	150	248	2.6832	0.0303556	0.00534759
chr2R:14311831:14311991:+@chr2R:14312112:14312171:+	FBgn0034345	302.44	0.17	3	121	SEflanking	7.65	4.92	0	160	59	1614	58	85	75	98	104	182	4.04609	0.0303784	0.0434783
chr3L:19789553:19790358:+@chr3L:19790428:19790819:+	FBgn0261283	312.966	0.01	4	70	CI	11	3.38	0	805	391	1651	160	90	72	352	747	927	1.06641	0.0113076	0.00326797
chr2L:6951274:6951573:+@chr2L:6951627:6952060:+	FBgn0020616	21.495	0.02	4	54	CI	10.75	3.59	0	299	433	2959	20	23	13	16	43	62	2.92734	0.06887	0.04
chr2L:8042440:8042613:-@chr2L:8042823:8042909:-	FBgn0031980	7589.59	0	1	210	CI	9.26	9.84	0	86	173	740	249	253	254	3684	2793	3557	0.599219	0.000626913	0.000545703
chr3R:4185680:4185968:-@chr3R:4186023:4186228:-	FBgn0037583	47.776	0.105	5	55	RI	8.47	3.01	0	205	288	288	66	36	22	25	64	79	3.08672	0.0432151	0.0344828
chr3R:13541574:13542656:-@chr3R:13543678:13544072:-	FBgn0261885	36.4778	0.045	1	1022	CI	7.65	8.18	1	394	1082	29116	60	44	36	151	151	200	4.57266	0.222233	0.0047619
chr2R:10483116:10483891:-@chr2R:10483949:10484048:-	FBgn0019938	35.9131	0.015	9	58	CI	7.14	3.1	0	99	775	775	22	11	8	46	85	129	0.965039	0.0286496	0.0166667
chr3R:6183821:6185620:+@chr3R:6185681:6187334:+	FBgn0015396	37.1827	0.02	2	61	CI	10.03	10.68	0	1799	1653	1653	28	24	17	101	192	277	0.874609	0.0171477	0.0075188
chr3L:2167550:2168784:-@chr3L:2168955:2169108:-	FBgn0035309	10.5631	0.1	1	171	CI	7.77	4.21	0	153	1234	1234	27	15	13	5	14	17	6.82188	0.275739	0.0909091
chrX:16342698:16342762:+@chrX:16343910:16344212:+	FBgn0262734	106.308	0.075	1	1148	CI	6.62	NA	1	64	302	5095	52	74	46	178	326	405	1.58574	0.0402254	0.0205128
chr2L:18832361:18833244:+@chr2L:18833305:18833630:+	FBgn0015808	63.9508	0	4	61	RI	5.62	10.49	0	883	325	325	8	16	6	37	68	117	0.904297	0.0108066	0.0285714
chr3R:22787447:22788173:-@chr3R:22788880:22789242:-	FBgn0039465	49.064	0.07	NA	707	CI	NA	NA	0	362	726	1387	28	29	20	15	23	43	5.02813	0.125072	NA
chrX:9005631:9005819:+@chrX:9005887:9006125:+	FBgn0030089	23.9617	0.02	5	68	CI	6.95	NA	0	188	238	5890	11	22	6	44	76	57	1.69063	0.0530843	0.0192308
chr3R:3298180:3298569:-@chr3R:3298983:3299503:-	FBgn0037504	83.9643	0.07	1	414	CI	7.36	10.18	0	520	389	389	22	25	27	24	59	128	2.32461	0.0494239	0.0357143
chrX:535111:535235:+@chrX:535330:537793:+	FBgn0003575	20.5001	0.01	5	95	CI	8.4	6.06	0	124	2463	2463	28	17	7	39	52	66	1.81055	0.065772	0.0227273
chrX:13633777:13633893:+@chrX:13633982:13634145:+	FBgn0030519	129.223	0.155	1	89	RI	6.06	NA	0	116	163	2003	63	44	52	43	61	97	4.94609	0.0906075	0.0238095
chr2L:9496145:9496255:+@chr2L:9503593:9504813:+	FBgn0032120	8.40551	0.015	2	7338	CI	10.24	7.62	2	110	1220	17103	9	3	1	65	62	74	0.785937	0.0907717	0.0263158
chr3L:10875990:10876183:+@chr3L:10876239:10876673:+	FBgn0036107	74.629	0.01	1	56	CI	11.11	8.11	0	193	434	434	15	13	24	25	47	89	2.26016	0.0324045	0.027027
chr3R:1651221:1651310:+@chr3R:1651527:1652298:+	FBgn0037384	20.723	0.05	3	217	CI	9.82	8.95	0	89	771	771	25	33	22	18	66	88	2.79609	0.0528773	0.030303
chr2L:8220045:8220434:-@chr2L:8220623:8220741:-	FBgn0032005	285.388	0.015	1	189	CI	11.01	8.29	0	118	389	2363	86	88	68	379	591	852	1.00264	0.00923665	0.00240964
chr3R:14582541:14582768:-@chr3R:14582827:14583287:-	FBgn0038651	17.2336	0.025	4	59	CI	7.77	2.83	0	460	227	6610	18	13	11	44	59	78	1.95781	0.0908867	0.0185185
chr3L:17418679:17418740:+@chr3L:17419010:17419179:+	FBgn0040793	710.272	0.015	2	270	CI	11.45	10.47	0	61	169	372	33	33	43	112	133	225	1.64355	0.0110542	0.00458716
chrX:16270686:16270820:+@chrX:16270881:16271040:+	FBgn0004598	24.911	0.04	5	61	CI	5.56	NA	0	134	159	4934	10	15	3	55	99	126	0.823926	0.0375033	0.0119048
chr3L:6733767:6733973:-@chr3L:6734057:6734739:-	FBgn0261934	9.98333	0.045	4	84	CI	7.97	4.77	0	682	206	12073	11	16	9	28	39	54	3.07031	0.273144	0.0344828
chr2R:2864721:2865107:-@chr2R:2865197:2866102:-	FBgn0022960	29.5478	0.02	2	90	CI	10.36	8.17	0	905	386	2317	12	5	3	35	55	102	0.748828	0.0443254	0.0227273
chr2R:20673265:20673618:-@chr2R:20673762:20674066:-	FBgn0041205	165.73	0.03	NA	144	RI	NA	NA	0	304	353	581	55	83	101	56	78	140	6.09375	0.0177365	NA
chr3L:23312161:23312277:-@chr3L:23312334:23312574:-	FBgn0010215	105.008	0.005	9	57	CI	7.73	8.22	0	240	116	531	19	6	1	55	105	198	0.470117	0.0123463	0.0144928
chr3R:19082208:19083502:-@chr3R:19083563:19083809:-	FBgn0039067	11.3437	0.025	1	61	CI	10.36	5.3	0	246	1294	2710	8	13	7	17	26	38	2.38984	0.0822408	0.0322581
chrX:14143224:14143330:+@chrX:14143408:14143515:+	FBgn0002873	26.3672	0.03	4	78	CI	4.94	NA	0	106	107	9220	10	8	3	18	37	31	2.11133	0.217549	0.0333333
chr2L:13171382:13171665:-@chr2L:13171739:13172250:-	FBgn0032475	36.6327	0.01	NA	74	RI	NA	NA	0	511	283	2016	45	21	15	80	186	228	1.09004	0.0308093	NA
chr2L:6729570:6729772:+@chr2L:6729827:6729934:+	FBgn0046704	16.6296	0.01	11	55	RI	5.24	8.37	0	202	107	2939	11	6	6	27	54	69	1.14746	0.031428	0.025641
chr2R:3841407:3841816:-@chr2R:3842818:3843387:-	FBgn0033236	26.6378	0.005	1	1002	CI	8.59	9.57	0	569	409	12268	44	24	15	115	128	174	2.0207	0.0971728	0.0075188
chr3R:3800859:3802135:-@chr3R:3802612:3802790:-	FBgn0037533	155.591	0.005	2	477	CI	8.4	9.07	0	178	1276	2004	32	18	15	208	436	594	0.420459	0.00919201	0.00423729
chr2R:11267062:11267726:-@chr2R:11267824:11268119:-	FBgn0000996	54.2355	0.025	NA	98	CI	NA	NA	0	295	664	3602	10	11	10	21	63	69	1.66094	0.10619	NA
chr2R:7477348:7477445:-@chr2R:7477508:7478130:-	FBgn0033636	28.838	0.015	NA	63	CI	NA	NA	0	622	97	12455	37	33	16	164	222	236	1.52852	0.0574817	NA
chr2R:2098233:2098330:-@chr2R:2099101:2099649:-	FBgn0021847	14.0338	0.175	5	771	RI	7.61	4.11	0	548	97	1043	26	32	33	10	16	41	7.60625	0.173809	0.0666667
chr2R:19842983:19843519:+@chr2R:19843576:19843929:+	FBgn0034939	63.9681	0.025	5	57	CI	5.13	8.06	0	536	353	353	39	43	35	30	114	180	2.24141	0.0233376	0.030303
chrX:8866941:8867413:-@chrX:8867688:8868288:-	FBgn0030073	23.3085	0.065	1	275	CI	9.44	NA	0	600	472	472	10	8	7	9	12	30	2.82891	0.0998005	0.0833333
chrX:3679627:3679846:+@chrX:3680177:3683803:+	FBgn0086899	64.023	0.005	NA	331	CI	NA	NA	0	219	3626	3626	15	1	6	152	386	497	0.223145	0.340689	NA
chr2R:17601641:17601671:+@chr2R:17602911:17603122:+	FBgn0004362	1592.7	0.06	1	1240	CI	8.46	9.21	1	30	211	1321	338	326	725	166	408	1047	5.91406	0.0275456	0.00141844
chr2R:8353183:8353529:-@chr2R:8353596:8353783:-	FBgn0033740	23.2078	0.03	5	67	CI	8.72	5.26	0	187	346	346	20	18	13	16	45	71	2.21016	0.0393948	0.0555556
chr2R:18525623:18525756:+@chr2R:18525816:18526373:+	FBgn0026261	88.8017	0.01	2	60	CI	5.87	6.16	0	133	557	557	13	14	10	16	30	41	2.55859	0.0362557	0.0555556
chr2L:10847425:10848168:-@chr2L:10848241:10848468:-	FBgn0004363	855.348	0.055	3	73	CI	7.65	4.76	0	227	743	941	69	58	52	224	271	414	1.31816	0.0117898	0.00392157
chr3L:4038814:4040031:-@chr3L:4040096:4040482:-	FBgn0035488	18.1177	0.03	NA	65	CI	NA	NA	0	386	1217	2508	47	26	41	184	256	364	1.07773	0.0142996	NA
chr3R:15441746:15442606:-@chr3R:15442975:15443481:-	FBgn0038720	52.7542	0	6	369	RI	8.02	12.73	0	506	860	860	13	9	5	64	172	281	0.421875	0.0144737	0.0222222
chr3R:1476976:1477524:+@chr3R:1477703:1477726:+	FBgn0262125	155.93	0.08	NA	179	CI	NA	NA	0	548	23	648	76	108	59	72	106	193	3.60938	0.0282742	NA
chr3R:9659917:9661259:-@chr3R:9661499:9662464:-	FBgn0266464	42.1307	0.035	3	240	CI	7.84	4.97	0	965	1342	2040	18	17	8	15	37	45	2.49609	0.104872	0.625
chrX:20923437:20923826:-@chrX:20923925:20924253:-	FBgn0031149	114.888	0.005	2	99	CI	6.58	NA	0	328	389	2914	88	62	59	163	321	325	1.85391	0.0331143	0.00591716
chr3R:25689423:25689858:-@chr3R:25689917:25690072:-	FBgn0039714	218.779	0.02	5	59	CI	8.84	7.56	0	155	435	435	107	51	34	159	248	351	1.32344	0.0138548	0.00613497
chr2R:8547002:8547887:-@chr2R:8547962:8548126:-	FBgn0261673	185.413	0.015	4	75	CI	10.06	1.39	0	164	885	885	19	16	18	23	49	62	2.59844	0.0461465	0.0243902
chr3R:7789192:7789492:+@chr3R:7789555:7790548:+	FBgn0000147	56.4711	0.015	2	63	CI	6.29	8.45	0	300	993	993	28	17	23	14	59	101	2.43906	0.0889776	0.0526316
chr2R:11154735:11154967:-@chr2R:11155347:11155470:-	FBgn0265194	10.8715	0.195	25	380	RI	9.6	4.39	0	123	232	4654	9	8	4	3	14	14	3.97734	0.524084	0.111111
chr3R:19432474:19432771:-@chr3R:19433247:19433387:-	FBgn0051145	76.6686	0.03	NA	476	CI	NA	NA	0	140	297	1298	10	13	9	13	41	56	1.95234	0.0652512	NA
chr2L:97884:98470:+@chr2L:98527:99723:+	FBgn0031216	12.3291	0.025	5	57	CI	9.73	6.72	0	586	1196	3559	10	2	2	23	40	45	0.86875	0.304612	0.04
chr2R:1182127:1182217:+@chr2R:1182302:1182568:+	FBgn0033015	101.072	0.04	NA	85	CI	NA	NA	0	90	266	1168	24	20	24	42	93	137	1.72539	0.0263185	NA
chr3L:871899:872233:+@chr3L:873308:873875:+	FBgn0052479	50.1652	0.035	1	1075	CI	10.75	7.25	0	334	567	22005	22	20	10	108	128	129	2.11602	0.135681	0.00689655
chrX:18752522:18753674:+@chrX:18753732:18754105:+	FBgn0030969	23.6889	0.025	3	58	CI	9.1	NA	0	1152	373	373	13	5	8	14	44	66	1.32676	0.0386539	0.0625
chr3R:8289247:8289355:-@chr3R:8289417:8289743:-	FBgn0038058	16.134	0.01	5	62	CI	4.74	10.16	0	326	108	1071	13	8	4	26	48	65	1.06953	0.0381985	0.0333333
chrX:11771770:11773021:-@chrX:11773083:11773364:-	FBgn0030349	17.1761	0.01	8	62	CI	9.22	NA	0	281	1251	1251	10	4	0	10	21	21	1.04785	0.0409452	0.0526316
chr2R:7195384:7195602:+@chr2R:7195661:7197334:+	FBgn0033616	7.8617	0.13	1	59	CI	7.61	8.79	0	218	1673	1673	51	53	55	21	48	60	7.725	0.0560014	0.0384615
chr2L:10264764:10264889:+@chr2L:10264947:10265229:+	FBgn0032202	229.964	0.01	NA	58	RI	NA	NA	0	125	282	282	14	10	8	60	55	112	0.9125	0.0124768	NA
chrX:15831943:15832368:-@chrX:15832791:15833273:-	FBgn0045073	106.102	0.03	2	423	CI	7.79	NA	0	482	425	3840	13	16	5	5	28	52	2.71523	0.0884932	0.2
chr3R:25761700:25763179:+@chr3R:25763237:25763533:+	FBgn0039727	6.05879	0.1	1	58	CI	7.97	5.01	0	1479	296	10692	13	9	6	59	75	72	1.4125	0.0807006	0.016129
chr2R:6499185:6499323:+@chr2R:6499420:6499959:+	FBgn0263102	33.943	0.01	4	97	CI	9.1	10.75	0	138	539	5365	37	16	5	35	92	112	1.67402	0.0765175	0.0204082
chr2R:10835399:10836355:-@chr2R:10836422:10836507:-	FBgn0261854	33.945	0.01	3	67	RI	10.75	6.22	0	85	956	4392	14	2	2	15	35	56	1.20566	0.0781699	0.0555556
chr3L:16055408:16055962:+@chr3L:16056188:16056273:+	FBgn0005536	41.9941	0.015	4	226	CI	8.68	7.14	0	554	85	18938	21	11	1	130	249	296	0.813281	0.0624721	0.00609756
chr3R:2473016:2473323:+@chr3R:2473387:2473650:+	FBgn0010355	25.5671	0.125	2	64	CI	8.82	-0.94	0	307	263	8383	50	55	43	35	57	60	7.71563	0.335647	1
chr2L:10357010:10357435:+@chr2L:10357492:10358078:+	FBgn0032229	90.3979	0.01	2	57	CI	10.08	4.09	0	425	586	586	28	33	30	34	65	142	2.45078	0.0221659	0.0232558
chr2R:8356417:8357387:+@chr2R:8357449:8359227:+	FBgn0033741	91.5105	0.005	2	62	CI	7.15	5.69	0	970	1778	1778	10	14	7	50	81	164	0.82207	0.0141129	0.0166667
chr2R:8450189:8450322:+@chr2R:8450395:8451689:+	FBgn0011592	7.83553	0.01	9	73	CI	6.97	5.96	0	133	1294	1294	12	4	8	42	69	86	0.850391	0.0198626	0.0217391
chrX:16443511:16443939:-@chrX:16444010:16444219:-	FBgn0011742	101.739	0.01	5	71	RI	-0.35	NA	0	209	428	1616	33	12	13	58	106	150	1.15312	0.0252891	0.0114943
chr3R:9608010:9608173:+@chr3R:9608430:9608563:+	FBgn0000454	131.235	0.135	1	257	CI	9.22	7.62	1	163	133	2968	30	20	30	37	72	80	3.16016	0.0466298	0.0188679
chr2R:10065603:10065708:+@chr2R:10065777:10066101:+	FBgn0000289	64.9216	0.095	5	69	RI	-6.01	11.98	0	105	324	4566	105	79	56	23	69	80	7.4	0.188209	0.016129
chr2R:2634748:2635628:+@chr2R:2635684:2636459:+	FBgn0042083	34.5729	0.01	3	56	CI	10.65	5.39	0	880	775	775	15	16	5	16	25	67	1.9418	0.0469764	0.05
chr3R:26309842:26310324:+@chr3R:26310409:26310474:+	FBgn0039776	178.078	0	6	85	CI	9.25	8.76	0	482	65	1112	5	4	3	34	78	38	0.642969	0.0236297	0.0526316
chr3R:21420796:21421324:+@chr3R:21425229:21425932:+	FBgn0011666	23.0253	0.11	5	3905	CI	9.88	6.44	0	528	703	8916	54	34	12	44	101	128	2.78984	0.133833	0.0192308
chr3L:17532556:17532594:+@chr3L:17532667:17532827:+	FBgn0259174	41.5525	0.025	NA	73	CI	NA	NA	0	38	160	7093	22	11	10	63	103	143	1.28125	0.0704235	NA
chr2R:5495206:5495522:+@chr2R:5495582:5495855:+	FBgn0050005	88.8228	0.09	3	60	RI	-0.5	8.85	0	316	273	273	26	40	33	28	39	68	4.59687	0.0469304	0.0344828
chr3R:21488872:21489592:+@chr3R:21489660:21489970:+	FBgn0261986	15.0137	0.05	3	68	CI	6.82	7.5	0	720	310	1702	8	8	4	41	103	139	0.553125	0.0207318	0.0227273
chrX:1924248:1924401:-@chrX:1924476:1924892:-	FBgn0000667	41.2608	0.01	3	75	CI	11	10.63	0	416	153	6546	12	9	6	28	70	79	1.42031	0.0791071	0.0294118
chrX:4011997:4012312:+@chrX:4012389:4013050:+	FBgn0026083	23.0584	0.02	2	77	RI	3.93	NA	0	315	661	11660	77	56	49	83	153	188	4.02266	0.137014	0.0194175
chr3R:4639212:4644985:-@chr3R:4646034:4646404:-	FBgn0037636	82.4561	0.18	1	1049	CI	7.96	5.94	0	370	5773	5773	26	25	7	5	17	14	6.80625	1.81314	0.0175439
chr2R:4503408:4504021:+@chr2R:4504205:4505676:+	FBgn0033313	25.4626	0.01	NA	184	CI	NA	NA	0	613	1471	8503	20	8	5	44	63	72	1.55625	0.089163	NA
chr3L:1789631:1793500:-@chr3L:1795199:1795328:-	FBgn0024510	7.34285	0.05	1	1699	CI	8.46	12.23	1	129	3869	3869	201	137	71	396	454	406	2.13281	0.0333549	0.0909091
chrX:20922153:20922632:-@chrX:20922943:20923230:-	FBgn0031149	114.888	0.01	4	311	SEflanking	10.28	NA	0	287	479	1720	56	25	14	80	207	221	1.13945	0.030235	0.00833333
chr2R:11935489:11935571:+@chr2R:11935637:11935783:+	FBgn0034071	27.4655	0.015	2	66	CI	8.38	10.38	0	82	146	12703	32	22	11	57	74	90	2.82422	0.0892625	0.0153846
chr2R:7874018:7874467:-@chr2R:7874532:7874731:-	FBgn0033672	49.2207	0.105	5	65	CI	8.31	3.86	0	199	449	449	34	40	35	23	45	105	3.69062	0.0510244	0.025641
chr3R:4394441:4394549:+@chr3R:4394610:4394970:+	FBgn0266916	22.3109	0.05	7	61	CI	7.83	11.23	0	108	360	360	4	5	2	13	35	39	0.810742	0.0210846	0.0666667
chr2R:16549979:16550600:-@chr2R:16550665:16550891:-	FBgn0034542	15.1693	0.015	5	65	CI	5.73	6.77	0	226	621	621	13	8	1	4	20	20	1.77891	0.0944912	0.1
chr3R:9861343:9861404:-@chr3R:9861546:9862120:-	FBgn0038196	195.873	0	1	142	CI	8.76	7.62	0	574	61	664	15	27	30	100	101	233	1.28438	0.00975249	0.00862069
chr3L:21489521:21489841:-@chr3L:21489920:21489977:-	FBgn0015239	46.1057	0.075	NA	79	CI	NA	NA	0	57	320	2722	61	59	46	16	72	184	3.75625	0.0995174	NA
chr2L:11508399:11509403:-@chr2L:11509467:11509683:-	FBgn0032363	28.022	0.015	NA	64	CI	NA	NA	0	216	1004	1004	29	17	13	53	103	118	1.30078	0.0333425	NA
chr2L:16258005:16258179:+@chr2L:16258249:16259433:+	FBgn0028515	102.75	0.01	1	70	CI	8.55	5.38	0	174	1184	1262	56	18	20	53	127	191	1.44258	0.0373132	0.0113636
chrX:20055973:20056475:-@chrX:20056568:20056764:-	FBgn0031091	29.1771	0.02	NA	93	CI	NA	NA	0	196	502	2087	16	17	25	17	22	49	4.75781	0.0825266	NA
chrX:14961040:14961690:+@chrX:14961921:14963124:+	FBgn0030607	10.7243	0.045	1	231	CI	8.56	NA	0	650	1203	1203	1	2	3	4	9	20	1.41953	0.2486	0.166667
chr3R:20022615:20024935:-@chr3R:20024997:20025309:-	FBgn0011725	26.89	0.02	NA	62	CI	NA	NA	0	312	2320	2320	15	12	10	24	68	103	1.42383	0.0507706	NA
chr3L:16889335:16889699:+@chr3L:16889904:16890280:+	FBgn0261565	13.1216	0.115	NA	205	CI	NA	NA	0	364	376	25683	1	3	0	5	3	4	3.99766	0.809582	NA
chr2R:10769623:10770722:+@chr2R:10770851:10771551:+	FBgn0033980	115.098	0.02	1	129	CI	11.01	8.41	0	1099	700	700	27	22	19	76	159	234	0.986719	0.0103865	0.0125
chr2L:22123741:22124028:+@chr2L:22124090:22124216:+	FBgn0032974	52.9826	0.02	3	62	CI	2.56	5.02	0	287	126	2524	65	42	40	31	62	101	4.26328	0.0855128	0.0285714
chr2L:13187033:13187325:-@chr2L:13187573:13189618:-	FBgn0032479	75.8466	0.05	2	248	RI	8.73	6.25	0	2045	292	3476	129	81	57	77	134	208	3.56641	0.100826	0.0106383
chr3R:14732331:14732742:+@chr3R:14732922:14734172:+	FBgn0038659	21.2046	0.11	NA	180	CI	NA	NA	0	411	1250	3555	122	126	118	13	25	57	18.8875	0.620228	NA
chrX:17714797:17716383:-@chrX:17716460:17716592:-	FBgn0030869	8.53966	0.035	8	77	CI	10.67	NA	0	132	1586	1586	17	2	2	6	25	35	1.40156	0.309793	0.125
chrX:9969009:9969103:-@chrX:9969177:9969660:-	FBgn0052685	22.738	0.03	3	74	CI	11.08	NA	0	483	94	3212	20	13	4	17	29	56	2.08125	0.0744066	0.0416667
chr3L:1492876:1493037:-@chr3L:1493094:1493265:-	FBgn0043458	31.1658	0.015	4	57	CI	8.15	5.55	0	171	161	2086	18	14	10	34	67	82	1.52969	0.0477966	0.0217391
chr2L:6961516:6961830:-@chr2L:6961895:6963619:-	FBgn0031878	84.9283	0.015	NA	65	CI	NA	NA	0	1724	314	314	35	26	17	37	103	174	1.48438	0.0237474	NA
chr3R:21903194:21904404:-@chr3R:21904530:21904683:-	FBgn0039411	6.42728	0.06	NA	126	CI	NA	NA	0	153	1210	2090	10	5	0	10	27	37	1.12168	0.0442953	NA
chr2R:20421938:20422609:-@chr2R:20422665:20422950:-	FBgn0035021	18.578	0.14	1	56	CI	8.56	4.35	0	285	671	1712	18	19	25	14	25	47	4.89062	0.0735391	0.0588235
chr2L:10193218:10194082:-@chr2L:10194151:10194313:-	FBgn0028675	11.7717	0.015	9	69	CI	7.7	2.21	0	162	864	11525	18	11	3	36	61	70	1.85156	0.11867	0.0208333
chr2R:11812427:11812706:-@chr2R:11812769:11812933:-	FBgn0034049	45.1616	0.02	NA	63	CI	NA	NA	0	164	279	2161	67	30	24	158	232	300	1.11289	0.0145697	NA
chr2R:9340296:9340511:+@chr2R:9340594:9340898:+	FBgn0086757	23.6499	0.105	5	83	CI	-18.36	11.34	0	215	304	304	16	11	11	6	14	34	3.60625	0.117837	0.0555556
chr3L:9775974:9777727:+@chr3L:9777797:9777991:+	FBgn0036043	26.2021	0.01	11	70	CI	11.45	5.35	0	1753	194	1769	2	3	2	9	17	16	1.22227	0.20253	0.0833333
chr2L:2153596:2154410:+@chr2L:2154473:2155105:+	FBgn0031392	54.6559	0.01	NA	63	CI	NA	NA	0	814	632	916	30	34	24	62	145	207	1.42168	0.0135425	NA
chr2L:2171142:2171198:-@chr2L:2177847:2178754:-	FBgn0000097	36.1003	0.115	1	6649	CI	9.22	12.45	0	907	56	14714	17	9	13	125	106	90	1.64062	0.0746618	0.0212766
chr2R:9086445:9086689:+@chr2R:9086841:9087008:+	FBgn0027079	51.9279	0.01	NA	152	CI	NA	NA	0	244	167	3373	63	41	31	77	156	182	2.15117	0.0699295	NA
chr4:897143:897415:-@chr4:897496:897820:-	FBgn0025726	26.8678	0.02	11	81	CI	11.01	5.18	0	324	272	8965	19	11	8	12	40	37	3.46953	0.244634	0.0588235
chr3R:26878338:26879029:-@chr3R:26879309:26879473:-	FBgn0010808	97.0542	0.005	2	280	CI	9.04	7.52	0	164	691	691	26	18	11	15	24	56	2.84023	0.0372561	0.0416667
chr2L:3622617:3622943:-@chr2L:3623006:3623195:-	FBgn0000721	10.2659	0.035	NA	63	CI	NA	NA	0	189	326	869	1	3	3	7	26	19	1.10078	0.0932363	NA
chr3R:8853749:8853868:-@chr3R:8853927:8854606:-	FBgn0038111	63.8809	0.015	3	59	RI	5.56	8.91	0	679	119	1863	34	26	18	41	84	101	2.11133	0.0481995	0.0192308
chr2R:16763110:16763168:+@chr2R:16763980:16764126:+	FBgn0050295	12.3715	0.12	6	812	CI	8.79	8.29	0	58	146	2670	7	2	2	5	10	11	2.17031	0.204155	0.142857
chr2R:19952516:19952633:+@chr2R:19952706:19952928:+	FBgn0025806	216.313	0.07	3	73	RI	10.08	12.18	0	117	222	222	99	123	125	111	194	410	3.10938	0.0190632	0.00746269
chr2L:2988116:2988383:+@chr2L:2988437:2988678:+	FBgn0025109	22.5321	0.025	1	54	CI	6.22	6.27	0	267	241	1638	11	13	16	12	37	62	2.59766	0.0837188	0.0833333
chr3L:998824:999013:-@chr3L:999079:999195:-	FBgn0024277	213.931	0.015	14	66	CI	6.05	5.27	0	116	189	3031	212	139	107	381	825	1076	1.44297	0.015745	0.0025
chr2L:20062545:20062653:+@chr2L:20062734:20063318:+	FBgn0019686	44.4978	0.025	NA	81	CI	NA	NA	0	108	584	1647	25	16	13	31	85	109	1.5625	0.067529	NA
chr3R:775501:776126:-@chr3R:776189:776474:-	FBgn0004436	149.423	0.005	2	63	CI	10.67	5.67	0	285	625	1649	22	15	6	74	139	156	0.752539	0.0212579	0.0120482
chr3L:9400817:9402291:-@chr3L:9402363:9402532:-	FBgn0035986	8.8589	0.035	NA	72	CI	NA	NA	0	169	1474	3012	12	16	8	19	28	40	2.71094	0.107911	NA
chr3R:18425396:18426198:+@chr3R:18426267:18427388:+	FBgn0051158	31.582	0.01	4	69	CI	9.79	9.58	0	802	1121	8297	18	11	10	100	146	166	0.957812	0.0662065	0.00840336
chr4:467257:467661:+@chr4:467727:467861:+	FBgn0016126	28.475	0.18	2	66	CI	9.08	3.35	0	404	134	6846	107	97	79	19	31	81	11.75	0.355585	0.0454545
chr3R:20014238:20014329:-@chr3R:20014392:20014479:-	FBgn0039163	133.522	0.17	NA	63	RI	NA	NA	0	87	91	883	57	58	89	14	32	59	11.8	0.15372	NA
chr3R:20746454:20747262:+@chr3R:20747324:20747560:+	FBgn0039249	11.5151	0.025	6	62	CI	5.91	5.16	0	808	236	783	17	14	4	13	32	51	1.80625	0.072282	0.0625
chr2R:9704067:9704206:+@chr2R:9704260:9704484:+	FBgn0261041	28.4775	0.01	19	54	CI	2.76	4.54	0	139	224	2816	26	15	12	59	86	92	1.50117	0.0541355	0.0149254
chr3L:23318742:23318923:-@chr3L:23318989:23319056:-	FBgn0010215	105.008	0.015	7	66	RI	10.15	4.71	0	67	181	7177	45	28	21	79	145	206	1.9	0.0599853	0.00990099
chrX:10605196:10609172:-@chrX:10609233:10611425:-	FBgn0052676	17.0093	0.025	3	61	CI	9.26	NA	0	2192	3976	3976	14	11	2	41	56	77	1.06055	0.0573514	0.0227273
chr3L:16383036:16383284:+@chr3L:16383402:16383916:+	FBgn0036624	21.1497	0.02	6	118	CI	9.88	5.74	0	248	514	514	15	7	6	13	37	38	1.71484	0.0624826	0.0714286
chr2R:6772827:6773037:+@chr2R:6773095:6773657:+	FBgn0033566	39.7991	0.05	NA	58	CI	NA	NA	0	210	562	785	31	36	40	26	57	122	3.37812	0.0658277	NA
chr3R:19572818:19573277:+@chr3R:19573613:19573700:+	FBgn0263782	9.56033	0.065	2	336	RI	8.73	10.48	0	459	87	3101	11	1	5	20	19	45	1.22227	0.483232	0.05
chr3L:2631715:2632121:+@chr3L:2633538:2633809:+	FBgn0035357	51.9031	0.07	NA	1417	CI	NA	NA	1	406	271	8446	102	71	46	180	247	378	2.35391	0.065586	NA
chr3L:7526607:7527265:+@chr3L:7527335:7528004:+	FBgn0028582	32.3517	0.01	3	70	CI	9.1	3.68	0	658	669	5777	10	4	2	18	37	40	1.29453	0.0899441	0.0454545
chr2R:10118997:10119469:-@chr2R:10120221:10120408:-	FBgn0261276	130.339	0.155	9	752	RI	0.92	6.57	0	187	472	1353	53	60	71	28	61	115	5.69219	0.0719731	0.0416667
chrX:11450217:11450379:-@chrX:11452566:11452679:-	FBgn0030309	62.066	0.175	1	2187	RI	5.73	NA	1	113	162	1296	4	3	1	28	31	44	0.498047	0.151746	0.0222222
chr2L:207406:207631:+@chr2L:207711:208608:+	FBgn0031233	12.3216	0.12	NA	80	CI	NA	NA	0	225	897	3014	77	62	56	21	66	96	5.9625	0.157685	NA
chr2R:8467229:8467558:-@chr2R:8467621:8468117:-	FBgn0022764	50.8223	0.01	NA	63	CI	NA	NA	0	496	329	4813	80	68	55	173	313	388	1.84258	0.0256918	NA
chr3R:15849637:15850036:+@chr3R:15850102:15851385:+	FBgn0243511	26.9971	0.01	4	66	CI	8.62	3.37	0	399	1283	2102	12	9	7	20	25	57	1.85391	0.0598968	0.0384615
chr2L:13520:13625:-@chr2L:13683:14874:-	FBgn0002121	61.7002	0	5	58	SEflanking	7.37	6.41	0	1191	105	3786	9	9	7	180	232	246	0.334814	0.012975	0.00471698
chr2R:11413524:11414100:-@chr2R:11414221:11414737:-	FBgn0019968	15.2829	0.015	4	121	CI	9.1	6.33	0	516	576	10817	27	14	4	57	95	113	1.62344	0.141257	0.016129
chr3L:184132:184260:-@chr3L:184318:184422:-	FBgn0083976	19.2136	0.12	1	58	CI	11.78	3.88	0	104	128	1738	70	39	36	31	57	122	3.5625	0.106171	0.0294118
chr3R:17097877:17098158:-@chr3R:17098209:17098557:-	FBgn0038877	37.323	0.13	2	51	RI	7.61	8.53	0	348	281	1358	12	37	33	7	32	69	4.99922	0.0522019	0.0454545
chr3R:10468394:10470910:-@chr3R:10471018:10471119:-	FBgn0086686	17.5319	0.155	NA	108	CI	NA	NA	0	101	2516	2516	51	41	29	8	27	42	7.1625	0.144676	NA
chr2L:10511253:10512608:-@chr2L:10512668:10512869:-	FBgn0021953	54.7331	0.005	3	60	CI	8.59	8.1	0	201	1355	1936	12	21	2	37	75	90	1.03672	0.0414951	0.0196078
chr2L:12055085:12055359:-@chr2L:12055902:12056042:-	FBgn0028425	215.58	0.155	NA	543	CI	NA	NA	2	140	274	3604	233	235	148	363	733	1143	2	0.0296005	NA
chr2L:15737628:15737964:-@chr2L:15740772:15740899:-	FBgn0010382	18.7681	0.04	3	2808	SEflanking	9.85	10.02	0	127	336	10383	21	15	9	124	164	170	1.03926	0.0552379	0.0263158
chr3R:5228286:5228495:-@chr3R:5228565:5229900:-	FBgn0037688	20.6739	0.025	NA	70	RI	NA	NA	0	1335	209	209	21	13	13	9	48	72	2.09219	0.0490188	NA
chr3L:20131479:20131649:+@chr3L:20131705:20131800:+	FBgn0005198	16.2077	0.02	13	56	RI	6.12	6.94	0	170	95	405	9	6	6	16	19	36	1.80273	0.0475313	0.0526316
chr2L:5274019:5275780:-@chr2L:5276288:5276368:-	FBgn0000228	12.3703	0.025	4	508	SEflanking	7.81	5.33	0	80	1761	4052	7	12	3	1	1	3	12.0219	0.813712	0.0526316
chr3R:9522549:9522949:-@chr3R:9523014:9523186:-	FBgn0028487	8.56147	0.025	8	65	CI	7.46	9.67	0	172	400	1964	2	1	0	9	16	26	0.41875	0.0655614	0.0666667
chr2L:2583534:2584198:-@chr2L:2584257:2584401:-	FBgn0026479	49.8422	0.01	2	59	CI	10.13	2.56	0	144	664	2917	44	17	22	51	94	153	1.81602	0.0527599	0.0142857
chrX:9008008:9008603:+@chrX:9008667:9008805:+	FBgn0030089	23.9617	0.01	9	64	CI	8.35	NA	0	595	138	3110	14	5	8	57	80	95	0.882812	0.0438455	0.0153846
chr3R:1362436:1362628:+@chr3R:1362693:1362815:+	FBgn0010051	11.9617	0.075	14	65	RI	4.65	5.6	0	192	122	2440	21	19	9	21	35	45	2.74063	0.121069	0.037037
chr2R:6780539:6781304:-@chr2R:6781362:6781919:-	FBgn0017414	20.8629	0.025	NA	58	CI	NA	NA	0	557	765	765	10	10	12	13	33	46	2.36641	0.0220639	NA
chr3L:6186580:6186722:+@chr3L:6187145:6187250:+	FBgn0024921	30.5368	0.15	1	423	CI	11	10.54	0	142	105	6340	81	61	56	111	216	251	2.76016	0.0553384	0.00735294
chr2L:117079:117759:-@chr2L:117820:118076:-	FBgn0031220	409.322	0.03	NA	61	RI	NA	NA	0	256	680	789	212	128	109	268	616	906	1.51133	0.00749801	NA
chr3L:13992480:13994533:-@chr3L:13994593:13994744:-	FBgn0036397	7.94048	0.045	NA	60	CI	NA	NA	0	151	2053	2053	21	22	14	17	36	57	3.09141	0.0858633	NA
chr2L:13634544:13635590:+@chr2L:13635649:13636001:+	FBgn0259984	80.0619	0.01	NA	59	CI	NA	NA	0	1046	352	3762	22	12	13	31	74	104	1.70312	0.0626097	NA
chr3R:8817466:8818121:-@chr3R:8818188:8818517:-	FBgn0041710	90.8564	0.01	NA	67	CI	NA	NA	0	329	655	950	61	40	20	88	183	241	1.34219	0.0221578	NA
chr2L:9839:11344:-@chr2L:11410:11518:-	FBgn0002121	61.7002	0.02	9	66	CI	6.3	9.76	0	108	1505	1505	54	26	11	66	113	166	1.38906	0.0285289	0.0102041
chr3R:17181414:17182426:-@chr3R:17182533:17182690:-	FBgn0266178	5.28147	0.01	4	107	CI	8.68	9.51	0	157	1012	1012	17	11	4	34	55	98	1.03223	0.0322507	0.0243902
chrX:15628303:15628485:+@chrX:15628586:15628639:+	FBgn0026666	51.234	0.115	1	101	RI	9.68	NA	0	182	53	1227	10	11	16	9	17	54	3.27031	0.108723	0.0322581
chr2R:12901294:12901501:-@chr2R:12902454:12902707:-	FBgn0034180	67.7043	0.045	2	953	CI	10.36	4.54	0	253	207	6322	115	67	50	40	67	97	6.36562	0.271202	0.00826446
chr2R:6784649:6784922:-@chr2R:6784977:6785092:-	FBgn0033570	176.821	0	NA	55	CI	NA	NA	0	115	273	273	17	17	8	40	40	119	1.40273	0.0233934	NA
chrX:18269282:18269419:+@chrX:18269876:18271897:+	FBgn0265784	38.2074	0.13	NA	457	CI	NA	NA	0	137	2021	2021	36	35	12	4	19	54	4.20625	0.0952321	NA
chrX:15894917:15895823:-@chrX:15895896:15896745:-	FBgn0003969	45.5056	0.005	8	73	RI	9.35	NA	0	849	906	1839	34	34	24	47	92	130	2.2082	0.0459253	0.0169492
chr3R:16893791:16894499:+@chr3R:16894560:16894741:+	FBgn0000083	348.995	0	3	61	RI	10.06	5.3	0	708	181	2079	25	33	14	277	464	664	0.398877	0.00990716	0.00361011
chr2L:8134842:8135614:-@chr2L:8135674:8136092:-	FBgn0031990	37.7286	0.01	5	60	RI	8.4	-13.39	0	418	772	1367	25	23	12	36	124	112	1.42949	0.0296103	0.0238095
chr3L:13014174:13014657:-@chr3L:13014728:13014785:-	FBgn0036337	35.0624	0.11	1	71	CI	5.63	10.65	0	57	483	1842	17	11	11	1	1	4	23.775	1.27338	0.25
chr3R:7235769:7236532:+@chr3R:7236778:7238162:+	FBgn0011774	25.9053	0.03	1	246	CI	11.08	3.96	0	763	1384	1384	28	27	26	37	92	117	2.21602	0.0516906	0.0227273
chrX:11284102:11284573:+@chrX:11289273:11289824:+	FBgn0001624	30.9857	0.08	NA	4700	CI	NA	NA	1	471	551	14536	22	13	15	34	64	91	3.08594	0.175517	NA
chrX:1823034:1823203:+@chrX:1823277:1823417:+	FBgn0023522	50.9276	0.02	3	74	CI	5.91	7.54	0	169	140	1273	9	12	5	7	39	71	1.64004	0.0577539	0.0434783
chr2L:17373579:17374156:-@chr2L:17374231:17374748:-	FBgn0032633	26.9554	0.015	2	75	CI	10.07	9.44	0	517	577	6645	52	26	17	71	109	130	2.22422	0.0634755	0.0116279
chr3L:1799010:1800699:+@chr3L:1800760:1802184:+	FBgn0067864	34.0055	0.03	2	61	CI	10.03	4.28	0	1689	1424	1424	53	54	42	41	65	134	3.65234	0.0505074	0.0243902
chrX:15234406:15235024:-@chrX:15235119:15235195:-	FBgn0030629	6.83148	0.06	2	95	CI	7.83	NA	0	76	618	618	6	4	8	5	20	40	1.95352	0.0745265	0.142857
chr2L:2234235:2234350:-@chr2L:2234409:2234868:-	FBgn0262126	81.7801	0.005	3	59	CI	10.22	5.82	0	459	115	3244	45	36	15	134	207	213	1.17266	0.0251838	0.00584795
chr3R:18432919:18433030:+@chr3R:18433114:18434193:+	FBgn0051158	31.582	0.04	NA	84	CI	NA	NA	0	111	1079	1450	20	22	5	24	49	77	1.72031	0.0338141	NA
chr3L:4126762:4126931:-@chr3L:4126989:4127162:-	FBgn0264693	64.6564	0.01	7	58	CI	10.45	1.54	0	173	169	4024	16	16	10	34	101	103	1.43477	0.0465924	0.0208333
chrX:6674823:6676519:-@chrX:6676594:6676725:-	FBgn0259228	16.9592	0.015	NA	75	CI	NA	NA	0	131	1696	1696	15	9	5	25	67	58	1.21875	0.0376368	NA
chr3L:3326265:3326712:+@chr3L:3327860:3328183:+	FBgn0035438	436.855	0.035	1	1148	CI	3.86	8.85	1	447	323	766	60	71	94	71	103	137	5.42188	0.0395087	0.00248756
chr3R:751798:752053:+@chr3R:766397:767662:+	FBgn0265082	43.7491	0.18	10	14344	CI	10.67	8.95	0	255	1265	4901	8	6	4	65	87	122	0.577734	0.0295209	0.0102041
chr3L:19592188:19593144:+@chr3L:19593207:19593376:+	FBgn0010417	27.8516	0.01	1	63	CI	6.14	6.63	0	956	169	1275	18	14	14	25	55	68	2.03047	0.0467045	0.0322581
chr3L:3218545:3218671:-@chr3L:3218752:3218920:-	FBgn0035420	21.9089	0.055	1	81	CI	4.82	11.59	0	168	126	7679	51	30	20	66	69	61	3.88047	0.160017	0.0123457
chr2R:20963128:20963245:-@chr2R:20964697:20964829:-	FBgn0004919	21.4266	0.08	3	1452	CI	8.83	10.28	0	132	117	3095	36	26	5	77	230	303	0.88125	0.0331186	0.150943
chr2R:20828148:20828577:-@chr2R:20828645:20828964:-	FBgn0035083	363.273	0.015	2	68	CI	7.75	7.65	0	319	429	429	44	42	61	121	195	340	1.56875	0.00921209	0.00769231
chr3R:10398145:10398859:-@chr3R:10398932:10399356:-	FBgn0038244	32.4787	0.025	4	73	RI	10.08	6.78	0	424	714	2665	44	43	41	31	76	83	4.56094	0.0900345	0.025
chr3R:4668392:4668561:-@chr3R:4670638:4672011:-	FBgn0262614	7.59585	0.045	1	2077	CI	8.15	9.7	0	1373	169	15771	2	3	2	13	19	15	1.96172	0.261919	0.0625
chr3R:9663100:9663424:-@chr3R:9663525:9663713:-	FBgn0266464	42.1307	0.01	1	101	CI	9.1	7.52	0	188	324	4205	7	8	6	25	49	79	1.18516	0.0439299	0.0263158
chr2R:3401589:3402668:-@chr2R:3402725:3403087:-	FBgn0033185	17.9611	0.01	3	57	CI	8.49	6.83	0	362	1079	1317	23	28	16	40	72	95	2.03594	0.030665	0.0181818
chr3R:14006407:14006544:-@chr3R:14006605:14006802:-	FBgn0261532	23.8676	0.03	5	61	RI	10.28	6.47	0	197	137	1547	22	10	3	12	24	46	1.90078	0.0572248	0.0769231
chr2L:19531095:19532110:+@chr2L:19532167:19532312:+	FBgn0032800	8.4121	0.04	5	57	CI	2.42	4.26	0	1015	145	818	10	13	12	13	42	51	2.25547	0.0563094	0.0588235
chr3L:12511538:12511767:+@chr3L:12511830:12512170:+	FBgn0041775	80.2381	0.015	5	63	RI	10.86	-0.68	0	229	340	2224	35	28	17	76	181	249	1.14336	0.0298117	0.00990099
chr3R:1353760:1353830:+@chr3R:1353887:1354002:+	FBgn0010051	11.9617	0.055	3	57	CI	7.83	3.6	0	70	115	11246	10	5	2	46	60	71	1.00039	0.086536	0.0181818
chr3L:1884323:1884560:-@chr3L:1884691:1885019:-	FBgn0000109	54.1898	0.015	NA	131	CI	NA	NA	0	328	237	765	9	7	3	22	33	68	0.996875	0.0258179	NA
chr3R:22892844:22892921:-@chr3R:22894866:22895792:-	FBgn0003495	185.042	0.04	1	1945	CI	8.94	7.89	0	926	77	2209	27	20	9	55	54	103	1.64492	0.046861	0.00925926
chr2L:9906033:9906443:-@chr2L:9907051:9907544:-	FBgn0032156	61.3113	0.005	NA	608	SEflanking	NA	NA	0	493	410	3164	21	7	8	121	330	363	0.411133	0.0223989	NA
chr3R:21311340:21312658:-@chr3R:21312717:21313993:-	FBgn0040212	9.19658	0.02	3	59	CI	6.64	10.05	0	1276	1318	1318	17	8	5	23	60	68	1.19063	0.0362171	0.037037
chr2L:9696191:9698233:-@chr2L:9699115:9699297:-	FBgn0000273	23.6103	0.025	1	882	CI	8.83	13.05	1	182	2042	15918	30	32	25	40	57	94	5.01562	0.374538	0.0192308
chr3L:19903602:19904619:+@chr3L:19904674:19905604:+	FBgn0036915	34.7096	0.035	NA	55	RI	NA	NA	0	1017	930	930	22	19	27	34	82	152	1.78281	0.0357677	NA
chr2L:6457540:6457916:+@chr2L:6458171:6459008:+	FBgn0031815	21.0164	0.06	5	255	RI	9.73	6.81	0	376	837	837	9	3	8	9	24	39	1.78359	0.0888131	0.0769231
chr3R:8178336:8179666:-@chr3R:8179720:8179852:-	FBgn0038016	33.8912	0.015	3	54	RI	7.36	5.41	0	132	1330	1801	42	33	18	68	114	155	1.67617	0.0163718	0.0147059
chr2L:10244457:10244545:-@chr2L:10244601:10244853:-	FBgn0024248	21.4033	0.02	6	56	CI	5.93	6.91	0	252	88	2033	24	20	20	23	50	45	3.77813	0.0720253	0.0384615
chr2L:11851827:11852022:+@chr2L:11852081:11852221:+	FBgn0032382	20.0775	0.01	4	59	CI	3.46	4.77	0	195	140	800	4	4	1	9	16	31	1.02891	0.0677833	0.0833333
chr2R:7579005:7579080:+@chr2R:7579473:7579672:+	FBgn0062449	31.3783	0.02	2	393	CI	10.67	11.36	0	75	199	5817	14	15	5	23	53	104	1.72383	0.0808968	0.0294118
chr2R:10823860:10823995:+@chr2R:10824052:10824341:+	FBgn0033984	11.0264	0.07	3	57	RI	3.45	2.92	0	135	289	4175	58	34	26	36	39	75	4.46094	0.135285	0.0263158
chr2L:19043535:19043883:-@chr2L:19043936:19044083:-	FBgn0032744	18.0443	0.06	3	53	RI	7.3	-0.87	0	147	348	348	36	34	14	8	21	64	3.61875	0.0470011	0.0909091
chrX:18534299:18534443:-@chrX:18541223:18541600:-	FBgn0027335	159.599	0.125	1	6780	CI	10.75	NA	3	377	144	4768	102	55	43	138	335	506	1.63555	0.0136134	0.598958
chrX:9972519:9975904:-@chrX:9975966:9976525:-	FBgn0052685	22.738	0.015	1	62	CI	8.56	NA	0	559	3385	10013	4	4	6	6	4	29	4.35703	0.303728	0.0769231
chr3R:249655:251486:-@chr3R:251553:252347:-	FBgn0037248	40.7799	0.01	NA	67	RI	NA	NA	0	794	1831	3281	58	21	17	49	120	173	1.7457	0.0384756	NA
chr3L:2564397:2564755:-@chr3L:2565601:2565621:-	FBgn0010909	118.912	0.12	8	846	RI	9.81	5.49	0	20	358	9908	5	12	10	2	1	15	11.5563	0.856101	0.05
chr3L:5751754:5752671:+@chr3L:5752729:5753709:+	FBgn0016756	81.7106	0.005	5	58	CI	9.65	8.82	0	917	980	2257	38	21	13	59	111	128	1.47383	0.0209149	0.0125
chr2L:1049674:1052265:-@chr2L:1052331:1052495:-	FBgn0003310	11.1011	0.02	NA	66	CI	NA	NA	0	164	2591	2591	6	5	3	16	34	58	1.0166	0.0617501	NA
chr3R:21510958:21511222:-@chr3R:21511289:21511424:-	FBgn0039360	50.9144	0.005	4	67	CI	6.04	8.83	1	135	264	264	14	2	7	25	24	68	1.04531	0.0192579	0.0285714
chr3R:8918778:8919097:+@chr3R:8920957:8921142:+	FBgn0038118	12.3159	0.07	4	1860	CI	8.83	11.43	0	319	185	68641	9	4	4	19	19	19	8.72188	1.53147	0.0294118
chr2L:9888098:9888338:+@chr2L:9888404:9888546:+	FBgn0029174	211.29	0.015	1	66	CI	10.47	3.46	0	240	142	1715	7	16	4	24	27	54	1.70273	0.0300183	0.0384615
chr2L:11007495:11007656:+@chr2L:11007715:11008261:+	FBgn0021761	49.3137	0.01	7	59	CI	9.14	9.32	0	161	546	3206	37	39	27	56	110	105	2.68047	0.0565421	0.0163934
chr3R:12098723:12099052:+@chr3R:12099874:12100891:+	FBgn0250823	82.7662	0.005	1	822	CI	8.88	12.76	0	329	1017	30616	50	37	32	176	218	265	3.32812	0.0924734	0.00393701
chr3L:2786487:2791277:-@chr3L:2791432:2791945:-	FBgn0263392	27.5093	0.01	NA	155	SEflanking	NA	NA	0	513	4790	5070	71	44	26	57	113	142	2.85625	0.0668213	NA
chrX:3267192:3267756:+@chrX:3268977:3270266:+	FBgn0262656	31.9062	0.04	1	1221	CI	10.03	NA	0	564	1289	16753	166	124	90	440	484	436	3.31719	0.0730735	0.00584795
chr2L:10403197:10403556:-@chr2L:10403730:10403828:-	FBgn0067622	14.1616	0.005	5	174	CI	8.49	9.17	0	98	359	359	7	14	37	59	70	167	1.53594	0.0157887	0.0135135
chr3L:3165181:3165254:+@chr3L:3167942:3168265:+	FBgn0052280	67.2438	0.15	1	2688	CI	7.75	9.88	3	73	323	1138	10	3	2	20	46	55	0.75918	0.0573651	0.0196078
chr3R:17036511:17036801:+@chr3R:17036863:17037041:+	FBgn0264357	46.0558	0.015	6	62	RI	8.57	5.13	0	290	178	3128	21	10	6	39	114	209	0.933789	0.0234216	0.0217391
chrX:12478418:12480282:-@chrX:12480343:12481933:-	FBgn0041203	7.51201	0.015	5	61	CI	9.26	NA	0	1590	1864	1864	7	5	0	7	24	22	1.13984	0.105408	0.0769231
chr3R:10705554:10705765:+@chr3R:10705886:10706516:+	FBgn0038268	9.40885	0.19	2	121	RI	4.3	5.34	0	211	630	2467	8	15	13	1	9	9	12.0062	0.814335	0.166667
chr3R:8242370:8242851:+@chr3R:8242940:8243114:+	FBgn0082831	21.4838	0.08	4	89	CI	7.61	10.44	0	481	174	4033	6	23	12	13	51	63	2.48047	0.126274	0.0384615
chr3R:23783078:23783341:-@chr3R:23783394:23783466:-	FBgn0039565	43.4504	0.03	3	53	CI	9.99	7.51	0	72	263	263	15	8	11	17	24	61	1.99531	0.0398265	0.0434783
chr3R:7411420:7414224:-@chr3R:7414282:7414735:-	FBgn0037918	22.8339	0.015	NA	58	CI	NA	NA	0	453	2804	3148	31	32	9	46	109	73	1.88789	0.0751527	NA
chr2L:12104492:12104552:+@chr2L:12104688:12105121:+	FBgn0027081	224.562	0.01	2	136	CI	10.45	7.07	0	60	433	2482	132	95	58	230	406	566	1.55156	0.0194497	0.00319489
chr3R:22692651:22692817:+@chr3R:22693131:22693208:+	FBgn0001197	755.911	0.125	1	314	CI	5.05	9.94	0	166	77	1811	51	71	69	72	111	225	3.28203	0.0377979	0.0111111
chr3L:21606897:21607112:-@chr3L:21607165:21607723:-	FBgn0037105	19.4616	0.045	5	53	CI	7.64	10.13	0	558	215	215	6	4	7	5	14	21	2.75273	0.0955444	0.1
chr2L:20339245:20339375:+@chr2L:20339582:20339939:+	FBgn0003475	31.3092	0.02	NA	207	CI	NA	NA	0	130	357	8804	43	23	12	22	69	106	3.11563	0.114629	NA
chr3R:16946752:16946941:-@chr3R:16947275:16947729:-	FBgn0023423	26.0226	0.005	5	334	CI	9.16	10.87	0	454	189	1967	6	6	3	31	73	65	0.652246	0.0371752	0.0222222
chr3R:3366590:3366854:-@chr3R:3366914:3366944:-	FBgn0015571	8.32728	0.135	NA	60	CI	NA	NA	0	30	264	2160	3	2	0	3	4	12	1.59023	0.127992	NA
chr2R:10865192:10865428:+@chr2R:10865735:10866211:+	FBgn0033987	5.01892	0.055	4	307	SEflanking	7.93	11.05	0	236	476	2565	3	7	3	1	11	9	3.9375	0.301212	0.5
chr2R:7475043:7475087:-@chr2R:7475151:7475216:-	FBgn0033636	28.838	0.175	9	64	SEflanking	8.02	9.13	0	65	44	10097	96	67	23	46	91	108	4.72969	0.215027	0.0172414
chr3L:16710707:16710940:+@chr3L:16711122:16714116:+	FBgn0000414	7.70901	0.115	5	182	RI	7.64	5.78	0	233	2994	6553	18	9	5	3	3	5	11.7625	1.28776	0.111111
chr2R:5075625:5075770:-@chr2R:5076159:5076513:-	FBgn0033391	46.2184	0.01	NA	389	RI	NA	NA	0	354	145	1595	29	21	8	74	171	314	0.79209	0.0331175	NA
chr2R:1008268:1009157:-@chr2R:1009242:1009345:-	FBgn0026238	103.096	0.06	2	85	SEflanking	3.41	11.48	0	103	889	4662	148	145	126	2	13	19	56	4.07922	0.0526316
chr2L:10264549:10264633:+@chr2L:10264764:10264889:+	FBgn0032202	229.964	0.04	NA	131	CI	NA	NA	0	84	125	465	6	6	5	53	58	131	0.521094	0.107917	NA
chr3R:7627674:7627802:-@chr3R:7627892:7628057:-	FBgn0051116	32.5639	0.02	3	90	CI	11.81	8.11	0	165	128	4836	10	26	8	17	74	97	1.91836	0.143142	0.0277778
chrX:5585925:5586137:+@chrX:5586198:5586342:+	FBgn0000394	93.5052	0.005	3	61	RI	6.51	NA	0	212	144	919	18	15	21	30	85	121	1.62539	0.0378862	0.0243902
chr3R:1362875:1363047:+@chr3R:1363108:1363272:+	FBgn0010051	11.9617	0.015	16	61	CI	9.94	7.07	0	172	164	2025	9	2	2	15	30	29	1.02266	0.0675961	0.0666667
chr2L:22742038:22742105:+@chr2L:22742161:22742364:+	FBgn0041004	111.453	0.03	5	56	CI	11.37	1.45	0	67	203	5112	35	11	16	3	9	10	13.3875	1.77236	0.0178571
chr2R:4049993:4050211:-@chr2R:4050275:4050745:-	FBgn0033272	49.107	0.045	2	64	RI	8.49	9.12	0	470	218	1027	35	33	22	19	60	86	3.00078	0.0474691	0.0416667
chr3R:20856930:20857025:-@chr3R:20857081:20857216:-	FBgn0039260	32.464	0.01	6	56	CI	6.31	7.52	0	135	95	1874	17	15	17	57	117	157	1.11875	0.0302348	0.016129
chr2L:8173601:8173908:+@chr2L:8174141:8174267:+	FBgn0264953	27.1203	0.02	4	233	CI	7.96	7.91	0	307	126	15996	24	16	6	46	77	79	2.54922	0.255692	0.0196078
chrX:21895317:21895749:+@chrX:21895869:21896111:+	FBgn0027279	52.027	0.01	2	120	CI	9.54	NA	0	432	242	14096	22	12	3	53	80	80	1.79883	0.0864357	0.0175439
chr3R:5536864:5537412:+@chr3R:5537472:5539303:+	FBgn0016792	34.83	0.01	1	60	CI	10.77	3.64	0	548	1831	2925	21	21	19	9	15	15	10.4656	0.18905	0.0147059
chr2L:19129862:19131685:-@chr2L:19131797:19131954:-	FBgn0086443	160.32	0.025	1	112	CI	8.84	3.51	0	157	1823	2216	117	122	79	98	233	354	2.85938	0.0415951	0.00740741
chrX:15230323:15230594:+@chrX:15230648:15232055:+	FBgn0026428	6.08504	0.055	5	54	RI	9.65	NA	0	271	1407	3745	9	9	1	6	13	14	2.54258	0.202409	0.111111
chr3L:600727:600770:-@chr3L:600843:600912:-	FBgn0035146	41.9286	0.085	2	73	CI	10.03	7.42	0	69	43	1676	153	65	66	55	148	169	3.7625	0.0504201	0.015873
chr3L:1351529:1351789:+@chr3L:1351853:1352108:+	FBgn0029514	34.5727	0.065	NA	64	CI	NA	NA	0	260	255	1000	30	37	44	22	77	165	2.88437	0.0615176	NA
chr3L:1663920:1664021:-@chr3L:1664532:1664844:-	FBgn0035253	128.78	0	2	511	CI	5.97	4.65	0	312	101	9774	41	28	20	104	131	220	1.93711	0.0806719	0.00662252
chr3R:14558828:14559086:-@chr3R:14559151:14559330:-	FBgn0024329	35.8056	0.01	6	65	CI	9.49	8.13	0	179	258	258	11	4	3	18	46	82	0.797266	0.0230357	0.0357143
chr3R:1430163:1431995:-@chr3R:1432052:1432265:-	FBgn0261004	19.5104	0.025	1	57	CI	9.85	-1.05	0	213	1832	3037	32	33	18	27	21	39	5.46563	0.140379	0.0285714
chr4:559500:568769:-@chr4:569885:570247:-	FBgn0026869	20.2643	0.025	NA	1116	CI	NA	NA	0	362	9269	9269	35	17	5	43	96	110	1.95234	0.110404	NA
chr3L:3044113:3044869:-@chr3L:3044973:3045131:-	FBgn0035390	70.2415	0.005	3	104	CI	7.35	9.62	0	158	756	756	22	23	7	18	34	54	2.33359	0.0693409	0.0416667
chr3R:1640401:1641005:+@chr3R:1643238:1643789:+	FBgn0261561	23.7877	0.02	NA	2233	CI	NA	NA	0	604	551	1304	7	7	2	6	15	15	2.16562	0.18825	NA
chr3R:20081007:20081227:-@chr3R:20081284:20081525:-	FBgn0011225	22.6686	0.005	10	57	CI	11	3.34	0	241	220	2679	15	17	0	25	56	55	1.20938	0.0771453	0.025
chr2L:7893431:7896754:-@chr2L:7975189:7977065:-	FBgn0085450	10.7353	0.12	NA	78435	CI	NA	NA	6	1876	3323	5567	3	3	0	11	22	25	0.810742	0.0985407	NA
chr3R:5549283:5549521:-@chr3R:5549582:5549799:-	FBgn0002431	36.7579	0.045	4	61	CI	9.72	3.35	0	217	238	9176	54	44	38	86	144	147	3.26562	0.0846813	0.00840336
chr3L:16343810:16343873:-@chr3L:16343933:16344052:-	FBgn0036614	12.6538	0.03	2	60	CI	8.33	10.11	0	119	63	2026	10	8	8	26	62	98	1.08184	0.0749954	0.0322581
chr2R:16145498:16148064:+@chr2R:16148126:16148251:+	FBgn0034491	48.623	0.09	NA	62	CI	NA	NA	0	2566	125	1105	6	7	8	39	61	75	0.906055	0.0160123	NA
chr3R:5193325:5194114:-@chr3R:5194178:5194360:-	FBgn0000723	36.151	0.015	6	64	CI	6.15	6.77	0	182	789	789	7	6	1	18	62	71	0.636035	0.0137797	0.05
chr2L:5541433:5541656:-@chr2L:5541723:5541969:-	FBgn0014189	329.643	0.005	NA	67	RI	NA	NA	0	246	223	2330	40	33	22	61	100	156	1.94453	0.0415943	NA
chr2R:20660121:20660318:-@chr2R:20660464:20660526:-	FBgn0035060	46.1328	0.175	6	146	SEflanking	7.44	5.73	0	62	197	4481	21	37	39	5	16	22	15.4	0.769267	0.0666667
chr3R:6587032:6587338:+@chr3R:6587566:6587747:+	FBgn0037831	18.793	0.06	1	228	CI	9.14	5.89	0	306	181	4912	21	21	14	15	39	61	3.39062	0.184649	0.0555556
chr3R:12168766:12170586:+@chr3R:12170648:12170849:+	FBgn0038418	5.23497	0.06	3	62	RI	3.35	8.68	0	1820	201	903	9	15	3	6	26	31	2.11875	0.0695369	0.0909091
chr3R:20887793:20888007:+@chr3R:20888065:20888342:+	FBgn0266719	50.7011	0.005	7	58	CI	6.93	8.17	0	214	277	2005	19	16	5	45	55	79	1.33223	0.0346253	0.0188679
chr3L:8880197:8880386:+@chr3L:8881059:8881234:+	FBgn0263930	12.2653	0.035	5	673	RI	11	11.57	0	189	175	3233	16	7	4	31	50	79	1.14688	0.053855	0.0294118
chr3R:601560:602526:+@chr3R:602586:603212:+	FBgn0010750	53.2307	0.025	2	60	CI	10.65	8.08	0	966	626	626	46	28	32	40	104	198	1.89844	0.0280217	0.0232558
chr3R:12942663:12943023:-@chr3R:12944459:12944876:-	FBgn0014141	177.471	0.045	2	1436	CI	6.99	4.45	0	417	360	25768	229	149	130	569	801	949	3.49375	0.0609887	0.00162602
chr4:553412:553552:+@chr4:553609:556506:+	FBgn0004607	42.1901	0.015	NA	57	CI	NA	NA	0	140	2897	7891	40	20	6	117	131	100	1.4	0.0813674	NA
chr2R:18809521:18809862:-@chr2R:18809920:18810101:-	FBgn0010660	32.0264	0.035	4	58	RI	1.31	6.38	0	181	341	3402	35	32	13	40	64	95	2.42578	0.0571047	0.0212766
chr3R:18237023:18237359:+@chr3R:18238371:18238572:+	FBgn0261279	28.2323	0.065	1	1012	CI	8.07	9.6	0	336	201	6402	34	34	29	45	81	105	3.37578	0.0825903	0.0172414
chrX:21868648:21868794:+@chrX:21868855:21869068:+	FBgn0031187	36.1687	0.01	6	61	CI	7.37	NA	0	146	213	3127	17	11	2	32	61	70	1.12754	0.0510484	0.0277778
chr3R:1379653:1379789:-@chr3R:1379851:1380038:-	FBgn0086768	88.9211	0.08	1	62	CI	7.75	-2.41	0	187	136	1244	36	33	44	40	60	98	3.93906	0.0344794	0.0222222
chr3R:6982820:6983215:+@chr3R:6983800:6984059:+	FBgn0040259	30.2029	0.11	1	585	CI	8.34	9.42	0	395	259	1666	10	13	10	7	9	17	5.92656	0.206837	0.0833333
chr3R:21073681:21073828:+@chr3R:21073895:21074303:+	FBgn0039301	27.8597	0.09	NA	67	RI	NA	NA	0	147	408	927	5	14	6	1	14	31	3.25156	0.0680764	NA
chr3L:9335265:9336229:+@chr3L:9338000:9338224:+	FBgn0035976	50.3264	0.03	NA	1771	CI	NA	NA	0	964	224	3436	54	33	21	30	101	161	2.35781	0.0864781	NA
chrX:817638:818651:-@chrX:818772:818950:-	FBgn0040344	11.1556	0.075	4	121	CI	7.8	6.59	0	178	1013	1729	38	13	16	12	18	52	3.74766	0.12324	0.0769231
chr2R:4056634:4056696:+@chr2R:4056750:4056945:+	FBgn0033273	14.4303	0.045	3	54	CI	9.1	2.9	0	62	195	844	12	9	8	14	49	83	1.38574	0.0484321	0.0625
chr2L:10254610:10255014:-@chr2L:10255078:10255270:-	FBgn0032200	273.172	0.005	2	64	CI	7.08	7.23	0	192	404	404	6	11	3	136	183	264	0.238623	0.00492565	0.00526316
chr3L:20016551:20016739:+@chr3L:20017053:20017082:+	FBgn0261574	17.0427	0.03	19	314	SEflanking	8.59	5.2	0	188	29	654	12	9	0	27	48	57	0.763281	0.0173028	0.0285714
chr2LHet:19633:20650:-@chr2LHet:20723:21373:-	FBgn0039958	82.3386	0.045	3	73	RI	4.68	7.21	0	650	1017	1017	71	58	34	21	76	103	3.79375	0.0521591	0.0169492
chr2R:19925466:19926902:+@chr2R:19926964:19927943:+	FBgn0034964	35.5712	0.015	1	62	CI	8.91	5.01	0	1436	979	5017	49	34	29	131	159	144	2.05586	0.0281158	0.00636943
chr2R:1654790:1654911:+@chr2R:1654968:1655066:+	FBgn0266580	152.043	0.025	11	57	CI	4.64	7.14	0	121	98	6861	212	165	131	255	551	696	2.74922	0.052558	0.00322581
chr2R:13553183:13553321:+@chr2R:13553537:13553664:+	FBgn0034258	310.043	0.145	1	216	CI	8.65	4.03	0	138	127	3243	232	244	251	654	892	1260	2.01133	0.0178713	0.00152439
chr2R:209800:210220:-@chr2R:210281:210443:-	FBgn0260798	41.1011	0.01	NA	61	CI	NA	NA	0	162	420	420	36	17	6	12	38	45	2.20664	0.0619047	NA
chr3R:17496027:17497045:-@chr3R:17497099:17497293:-	FBgn0259113	26.9678	0.01	2	54	CI	10.45	8.23	0	194	1018	4761	21	19	20	83	119	144	1.47656	0.0388899	0.010989
chr2R:12037628:12038570:+@chr2R:12051592:12052618:+	FBgn0034083	31.3991	0.095	1	13022	CI	9.66	8.28	4	942	1026	5432	23	11	8	123	159	213	0.714941	0.0170449	0.10559
chr3R:12281774:12282037:+@chr3R:12282122:12282441:+	FBgn0038432	23.3418	0.02	1	85	CI	10.45	5.81	0	263	319	1833	15	18	12	6	32	36	3.65313	0.239367	0.0909091
chr2R:19826182:19826886:-@chr2R:19826944:19827277:-	FBgn0034933	29.7369	0.05	1	58	CI	-0.85	4.8	0	333	704	2286	61	45	65	47	87	147	4.09687	0.0718241	0.0142857
chr3R:19579010:19579430:+@chr3R:19579488:19580345:+	FBgn0028684	123.364	0.01	2	58	RI	8.23	10.33	0	420	857	857	10	22	11	37	60	86	1.57109	0.0240216	0.0192308
chr2L:20677544:20677823:+@chr2L:20677879:20677954:+	FBgn0086657	17.9972	0.04	4	56	CI	9.82	3.52	0	279	75	1100	8	6	5	13	34	69	1.19727	0.0483177	0.0526316
chr2R:579255:579515:-@chr2R:579584:579751:-	FBgn0026401	64.5597	0.03	NA	69	CI	NA	NA	0	167	260	338	33	17	9	66	154	212	0.822461	0.0103972	NA
chrX:19165316:19165487:+@chrX:19165552:19167313:+	FBgn0040068	14.1652	0.025	NA	65	CI	NA	NA	0	171	1761	1761	15	7	4	14	29	35	1.7418	0.0398227	NA
chr2R:13306589:13306752:-@chr2R:13306916:13307512:-	FBgn0021818	25.4202	0.025	NA	164	CI	NA	NA	0	596	163	5277	38	28	35	112	120	141	2.31562	0.0570039	NA
chr3R:16584704:16584821:-@chr3R:16585097:16585626:-	FBgn0051195	12.0916	0.15	5	276	RI	10.08	8.97	0	529	117	1830	29	22	19	26	47	76	2.84258	0.0895502	0.025
chr3L:19862203:19862407:-@chr3L:19862468:19862528:-	FBgn0262518	77.3173	0.02	2	61	CI	11.01	10.31	0	60	204	1819	29	26	12	63	96	155	1.37344	0.0351747	0.0151515
chrX:12487040:12487645:-@chrX:12487909:12488925:-	FBgn0030403	30.947	0.035	3	264	CI	7.83	NA	0	1016	605	1057	9	26	20	7	24	61	3.90781	0.0692954	0.0555556
chrX:9672901:9672946:+@chrX:9673085:9673275:+	FBgn0030151	128.831	0.05	2	139	RI	7.96	NA	0	45	190	3042	62	45	31	34	60	101	3.9	0.0708724	0.025
chr2L:7220369:7220677:-@chr2L:7220742:7221087:-	FBgn0263133	15.5951	0.065	3	65	CI	7.05	10.06	0	345	308	308	4	5	9	20	51	69	0.971875	0.0246619	0.047619
chr3R:5377983:5378144:+@chr3R:5378413:5379469:+	FBgn0037707	75.4737	0.025	2	269	CI	8.76	4.82	0	161	1056	1056	52	38	41	15	20	64	6.5625	0.150784	0.0454545
chr3R:21128186:21128801:+@chr3R:21128865:21129378:+	FBgn0051370	34.9744	0.025	1	64	CI	8.99	2.29	0	615	513	843	8	7	4	11	22	45	1.54062	0.073219	0.0833333
chr3L:20128521:20128720:+@chr3L:20128778:20129034:+	FBgn0005198	16.2077	0.02	9	58	CI	2.65	6.46	0	199	256	3332	10	4	3	17	32	46	1.23555	0.0762025	0.05
chr2R:16550958:16551373:-@chr2R:16551440:16552182:-	FBgn0034542	15.1693	0.035	3	67	CI	1.5	11.42	0	742	415	1394	26	7	5	25	47	42	1.53047	0.057044	0.03125
chr2L:19781092:19782365:-@chr2L:19782421:19782825:-	FBgn0032821	10.4942	0.06	2	56	CI	10.07	10.05	1	404	1273	7491	28	9	3	47	70	57	1.53125	0.171595	0.0172414
chr3R:1502991:1503324:+@chr3R:1503387:1503486:+	FBgn0037363	9.07996	0.035	3	63	RI	6.64	10.23	0	333	99	2265	14	16	5	23	37	58	1.80547	0.0646689	0.0357143
chr2L:10398279:10398392:+@chr2L:10398444:10398593:+	FBgn0051716	64.0563	0.115	2	52	RI	6.97	8.51	0	113	149	4762	55	66	37	27	105	148	3.75781	0.12487	0.0208333
chr3R:1620871:1621017:+@chr3R:1621100:1621562:+	FBgn0037379	17.7043	0.015	2	83	CI	8.34	8.88	0	146	462	4616	42	28	28	55	103	129	2.51992	0.084418	0.0172414
chr3L:18872902:18874079:-@chr3L:18874178:18874351:-	FBgn0036821	109.527	0.005	4	99	RI	8.59	3.95	0	173	1177	2729	18	13	8	10	33	50	2.51797	0.138594	0.0454545
chr2R:18815039:18815152:+@chr2R:18816611:18817596:+	FBgn0261564	32.837	0.15	NA	1459	CI	NA	NA	0	113	985	2956	16	12	4	13	33	62	1.90039	0.0784679	NA
chr2L:20660449:20661148:-@chr2L:20661990:20663929:-	FBgn0051678	20.8767	0.025	4	842	CI	10.47	10.93	0	1939	699	2016	40	18	9	7	56	50	2.61914	0.102717	0.0909091
chr3R:1536016:1536585:+@chr3R:1536653:1538559:+	FBgn0261261	8.75979	0.015	9	68	CI	8.35	5.15	0	569	1906	1906	27	6	4	31	81	129	0.983594	0.0529893	0.025641
chr2R:11747700:11747809:-@chr2R:11747882:11748035:-	FBgn0022160	42.8681	0.02	3	73	CI	9.65	6.37	0	153	109	2552	13	13	10	10	28	27	3.64297	0.114084	0.0666667
chr2R:18782306:18782519:+@chr2R:18782583:18783268:+	FBgn0034796	22.8026	0.12	2	64	CI	8.82	7.03	0	213	685	685	9	6	9	6	10	15	4.9125	0.193577	0.125
chr2R:7776454:7776894:-@chr2R:7778176:7778484:-	FBgn0033663	1182.05	0.015	1	1282	CI	10.1	9	0	308	440	1821	78	59	31	455	672	893	0.583691	0.00632754	0.00340716
chr3L:12494613:12494818:+@chr3L:12494875:12495047:+	FBgn0036291	15.9905	0.025	1	57	CI	1.97	4.68	0	205	172	872	4	6	1	4	14	48	1.45293	0.082784	0.111111
chr2L:10766191:10766275:-@chr2L:10766391:10767086:-	FBgn0015320	100.579	0.005	NA	116	CI	NA	NA	0	695	84	1265	25	24	19	52	124	224	1.23047	0.023327	NA
chr2R:2869248:2869414:-@chr2R:2869474:2870254:-	FBgn0050156	6.43578	0.115	NA	60	CI	NA	NA	0	780	166	463	69	38	40	1	1	15	22.9	0.674007	NA
chrX:8612150:8613428:-@chrX:8613489:8613936:-	FBgn0027330	23.1602	0.015	2	61	CI	6.12	NA	0	447	1278	2682	17	12	11	30	41	73	1.9125	0.0531411	0.030303
chr2R:5939039:5939206:-@chr2R:5939307:5939672:-	FBgn0263260	293.719	0.02	1	101	CI	10.38	3.51	0	365	167	839	68	76	70	100	155	219	2.99844	0.0294723	0.00877193
chr3L:11601637:11601704:-@chr3L:11601776:11602565:-	FBgn0036180	13.0467	0.025	NA	72	CI	NA	NA	0	789	67	3168	17	8	7	19	51	63	1.65312	0.106123	NA
chrX:422578:423384:-@chrX:423443:423882:-	FBgn0024983	39.3673	0.02	NA	59	CI	NA	NA	0	439	806	1410	14	7	9	12	31	28	2.69141	0.0530906	NA
chr3R:25657412:25657554:-@chr3R:25657637:25658070:-	FBgn0039705	42.8284	0.005	5	83	RI	8.4	5.29	0	433	142	4551	42	29	16	31	51	126	2.79219	0.0788721	0.027027
chr2R:5074175:5075770:-@chr2R:5076159:5076513:-	FBgn0033391	46.2184	0.01	3	389	CI	10.1	11.18	0	354	1595	1595	29	21	8	74	171	314	0.79209	0.0331175	0.0107527
chr2L:5540972:5541090:-@chr2L:5541153:5541336:-	FBgn0014189	329.643	0	NA	63	CI	NA	NA	0	183	118	1764	59	48	22	105	170	249	1.49922	0.0235544	NA
chr2R:3805237:3806344:+@chr2R:3806406:3807452:+	FBgn0015509	87.4946	0.015	2	62	RI	4.3	7.26	0	1107	1046	2678	168	122	127	235	421	543	2.39375	0.0252356	0.00429185
chr3L:326704:326724:-@chr3L:326867:327079:-	FBgn0052343	19.7355	0.05	4	143	CI	10.03	3.94	0	212	20	1739	57	36	40	36	78	117	3.41328	0.054547	0.5
chr3L:5783292:5784743:-@chr3L:5784796:5785685:-	FBgn0086694	39.1829	0.025	NA	53	CI	NA	NA	0	889	1451	1812	34	34	15	63	96	123	1.77812	0.034845	NA
chr3R:634058:634996:-@chr3R:637705:637818:-	FBgn0026417	17.8659	0.13	1	2709	CI	11	7.89	0	113	938	938	119	82	31	150	185	257	1.91992	0.0182983	0.0243902
chr3L:12780893:12781053:-@chr3L:12781116:12781189:-	FBgn0260945	9.19782	0.065	5	63	CI	6.49	3.24	0	73	160	3524	3	2	1	7	28	34	0.844141	0.418997	0.0833333
chrX:15783335:15783781:-@chrX:15783942:15784142:-	FBgn0030703	290.407	0.03	1	161	CI	9.6	NA	0	200	446	2181	45	42	23	108	187	300	1.28672	0.0229241	0.00719424
chr2L:9896265:9897131:-@chr2L:9897473:9897552:-	FBgn0004867	4513.69	0	NA	342	CI	NA	NA	0	79	866	866	9	13	12	185	40	153	1.04453	0.00775341	NA
chr3R:14065142:14065832:-@chr3R:14065892:14067622:-	FBgn0038588	8.03266	0.03	NA	60	CI	NA	NA	0	1730	690	690	4	4	5	10	15	32	1.60469	0.0491127	NA
chr3R:27690854:27691047:-@chr3R:27691473:27691758:-	FBgn0011224	16.0096	0.01	10	426	CI	6.25	8.89	0	285	193	18338	1	0	1	9	7	14	0.894336	1.68518	0.0769231
chrX:6654310:6654379:+@chrX:6654447:6661155:+	FBgn0029899	10.917	0.08	3	68	CI	10.91	NA	0	69	6708	10298	53	36	15	36	48	65	4.70781	0.102317	0.027027
chr3R:14488892:14489053:-@chr3R:14489110:14489274:-	FBgn0261065	32.6624	0.045	1	57	CI	5.19	3.68	0	164	161	2210	27	30	15	21	34	62	3.41875	0.0640435	0.0416667
chr3R:5322917:5323294:-@chr3R:5323354:5323524:-	FBgn0014380	102.153	0.02	3	60	CI	8.02	7.96	0	170	377	471	11	4	4	45	80	105	0.526563	0.0102641	0.0192308
chr2R:9338091:9338503:+@chr2R:9338595:9339380:+	FBgn0086757	23.6499	0.015	1	92	CI	7.2	8.67	0	412	785	2303	15	20	25	24	44	75	3.15703	0.0767177	0.0333333
chr2R:9330439:9330633:-@chr2R:9331933:9332199:-	FBgn0013765	27.5327	0.125	3	1300	RI	10.74	11.17	0	266	194	3814	74	35	23	40	95	160	2.56484	0.0721502	0.0185185
chr2L:2988437:2988678:+@chr2L:2988740:2989081:+	FBgn0025109	22.5321	0.03	2	62	RI	7.34	7.8	0	241	341	1335	5	2	5	11	16	23	1.65898	0.0597725	0.0588235
chr3L:15960016:15960711:-@chr3L:15960808:15960972:-	FBgn0263599	27.7659	0.035	1	97	CI	11.37	9.67	0	164	695	6775	33	18	19	75	87	97	2.23906	0.0896734	0.00917431
chr3L:17005986:17007029:-@chr3L:17007093:17008004:-	FBgn0036685	56.483	0.005	4	64	CI	8.95	8.72	0	911	1043	1043	18	10	5	9	25	38	2.15391	0.063907	0.0588235
chr2R:10061605:10062077:+@chr2R:10063911:10064047:+	FBgn0000289	64.9216	0.055	NA	1834	CI	NA	NA	2	472	136	6432	21	32	16	50	94	155	2.02695	0.0654571	NA
chr3R:23376307:23376429:-@chr3R:23376595:23376768:-	FBgn0004387	13.2056	0.03	7	166	SEflanking	9.73	10.29	0	173	122	2932	63	42	21	32	97	111	2.79219	0.104875	0.0227273
chr2R:11152324:11152481:-@chr2R:11152728:11152865:-	FBgn0265194	10.8715	0.17	30	247	SEflanking	10.22	5.2	0	137	157	2168	8	5	4	2	9	6	5.68594	0.358229	0.25
chr3L:20008158:20008420:+@chr3L:20008478:20009207:+	FBgn0261574	17.0427	0.035	11	58	CI	5.88	10.19	0	262	729	9229	5	4	0	20	26	30	1.0123	0.129019	0.0454545
chr2R:12084845:12085843:+@chr2R:12085990:12086451:+	FBgn0265178	38.022	0.02	NA	147	CI	NA	NA	1	998	461	1070	7	8	12	9	17	36	3.10156	0.142691	NA
chrX:17496018:17496128:+@chrX:17496185:17497126:+	FBgn0026313	12.979	0.015	4	57	CI	8.28	NA	0	110	941	4727	13	11	11	40	45	70	1.84219	0.0657953	0.0169492
chr2R:10494659:10495338:-@chr2R:10495403:10498989:-	FBgn0026427	20.7055	0.005	6	65	CI	6.3	7.61	0	3586	679	679	5	3	3	24	46	41	0.688477	0.0274911	0.03125
chr3L:4199650:4199882:+@chr3L:4199941:4200568:+	FBgn0263110	8.37155	0.045	12	59	CI	11.08	8.31	0	232	627	24062	4	1	1	32	41	36	0.908398	1.28086	0.0217391
chr3R:16125690:16125874:+@chr3R:16125939:16126134:+	FBgn0262582	21.8342	0.025	11	65	RI	10.86	3.5	0	184	195	3725	32	31	7	45	133	139	1.49629	0.0413917	0.0192308
chr3R:2924041:2924205:-@chr3R:2924277:2924454:-	FBgn0261238	8.91742	0.065	5	72	RI	8.34	6.76	0	177	164	3887	11	9	3	3	10	49	2.94453	0.158489	0.142857
chr3R:23535999:23536258:+@chr3R:23536336:23536579:+	FBgn0039544	14.619	0.02	5	78	CI	10.49	9.97	0	259	243	243	4	4	4	10	16	30	1.42852	0.0451252	0.0833333
chrX:6979443:6979550:-@chrX:6979652:6980011:-	FBgn0264270	75.9373	0	5	102	CI	10.22	NA	0	359	107	10967	10	10	5	46	88	129	1.15117	0.0945863	0.0192308
chrXHet:77098:77373:+@chrXHet:77432:77735:+	FBgn0003559	42.49	0.005	3	59	CI	6.43	NA	0	275	303	2817	33	28	22	65	126	157	1.69531	0.0271624	0.0128205
chr2R:18060512:18061072:-@chr2R:18061131:18061616:-	FBgn0034703	19.7056	0.025	3	59	CI	7.44	5.91	0	485	560	764	11	16	9	25	51	77	1.53027	0.0380152	0.0333333
chr2L:21140009:21140156:-@chr2L:21140217:21140478:-	FBgn0023388	27.0733	0.02	NA	61	CI	NA	NA	0	261	147	5717	26	33	15	35	101	147	2.16875	0.0841197	NA
chrX:19470072:19470425:-@chrX:19470728:19471232:-	FBgn0031030	99.1372	0.03	3	303	CI	10.9	NA	0	504	353	6671	17	14	15	18	55	87	2.60117	0.194425	0.04
chr2R:4619665:4619910:-@chr2R:4619970:4620123:-	FBgn0086784	24.3701	0.01	3	60	CI	11.78	10.09	0	153	245	2903	37	21	11	64	138	212	1.19141	0.0379917	0.0153846
chr2L:7051760:7053365:+@chr2L:7053476:7054847:+	FBgn0262872	22.3777	0.01	5	111	CI	8.02	10.33	1	1605	1371	2534	37	26	15	52	117	162	1.5582	0.0243747	0.0151515
chr2L:834867:835290:-@chr2L:835353:835547:-	FBgn0020304	95.5974	0.01	NA	63	CI	NA	NA	0	194	423	1706	25	16	6	87	182	203	0.664062	0.0209054	NA
chr3R:16406405:16406766:-@chr3R:16406835:16407096:-	FBgn0054008	9.71204	0.025	2	69	CI	8.4	8.26	0	261	361	361	8	11	10	6	20	11	6.45312	0.0945837	0.111111
chr2L:6066087:6066312:+@chr2L:6066369:6067235:+	FBgn0031774	17.8961	0.045	NA	57	CI	NA	NA	0	225	866	1266	4	10	10	7	10	18	5.03984	0.132595	NA
chr2R:17604285:17605201:-@chr2R:17606586:17607188:-	FBgn0050404	95.2704	0.03	NA	1385	CI	NA	NA	0	602	916	916	22	28	14	25	56	109	2.06172	0.0336048	NA
chrX:14476532:14476726:-@chrX:14476790:14477015:-	FBgn0030572	85.9553	0.01	1	64	CI	11.78	NA	0	225	194	557	16	24	28	28	37	81	3.30781	0.0566234	0.0322581
chr3R:3948447:3949225:+@chr3R:3949281:3949789:+	FBgn0037549	145.119	0.005	1	56	CI	11.11	7.2	0	778	508	1714	70	62	61	197	290	431	1.48398	0.0145292	0.00390625
chr3L:7529811:7529869:+@chr3L:7530076:7531379:+	FBgn0028582	32.3517	0.055	8	207	CI	3.28	4.24	0	58	1303	3036	21	21	14	3	19	13	9.28125	0.650825	0.0434783
chr2R:20198245:20198353:+@chr2R:20198416:20198660:+	FBgn0003888	261.222	0.02	2	63	CI	5.3	7.9	1	108	244	2206	67	41	31	105	236	351	1.37422	0.0346742	0.00689655
chr3R:8817466:8818121:-@chr3R:8818188:8818469:-	FBgn0041710	90.8564	0.01	NA	67	CI	NA	NA	0	281	655	950	61	40	20	88	183	241	1.34219	0.0221578	NA
chr2L:3027339:3028308:-@chr2L:3028366:3029006:-	FBgn0031493	43.0988	0.015	2	58	CI	8.82	9.26	0	640	969	2056	7	13	4	44	85	115	0.717578	0.0254911	0.0175439
chr2R:5992222:5992335:+@chr2R:5992446:5992572:+	FBgn0004907	1152.32	0.115	3	111	RI	10.67	4.65	0	113	126	4746	219	211	167	392	496	702	2.83789	0.0320941	0.00171821
chr3R:5844219:5844280:-@chr3R:5844664:5845157:-	FBgn0053208	11.0014	0.015	7	384	CI	2.7	11.33	0	493	61	17004	8	4	0	10	20	32	2.46211	0.281878	0.0625
chrX:15745121:15745229:-@chrX:15745618:15746772:-	FBgn0026076	34.5348	0.025	2	389	CI	9.72	NA	0	1154	108	1465	24	14	21	25	48	81	2.47656	0.0280847	0.0277778
chr3L:6731628:6733021:-@chr3L:6733405:6733973:-	FBgn0261934	9.98333	0.015	5	384	CI	4.33	9.27	0	568	1393	11121	16	13	7	33	40	72	2.49297	0.214681	0.027027
chr4:639162:639257:+@chr4:639319:639689:+	FBgn0025936	24.4232	0.015	10	62	CI	3.1	4.68	0	95	370	3777	55	9	6	64	118	116	1.24102	0.0592431	0.0116279
chr3L:9487655:9488951:-@chr3L:9489017:9489931:-	FBgn0036007	12.7911	0.03	4	66	CI	10.91	10.04	0	914	1296	1296	2	1	0	3	12	11	0.728516	0.317039	0.0833333
chrX:15968750:15974738:-@chrX:15974837:15974990:-	FBgn0028397	5.17844	0.03	5	99	CI	8.76	NA	1	153	5988	5988	4	1	0	2	9	4	1.63555	0.434958	0.166667
chr2R:10102864:10103207:-@chr2R:10103456:10103615:-	FBgn0033912	9155.12	0.01	NA	249	CI	NA	NA	0	159	343	606	221	220	181	2215	1853	2581	0.68125	0.00129882	NA
chr3R:7576653:7580833:-@chr3R:7580899:7581109:-	FBgn0017581	112.698	0.01	NA	66	CI	NA	NA	0	210	4180	4180	33	27	32	204	356	339	0.914844	0.0118851	NA
chr2L:833587:834583:-@chr2L:834974:835290:-	FBgn0020304	95.5974	0.055	NA	391	CI	NA	NA	0	316	996	999	85	62	42	63	128	196	2.6082	0.0290489	NA
chr3R:11161795:11161994:+@chr3R:11162056:11162591:+	FBgn0038320	70.4176	0	5	62	CI	6.9	7.94	0	199	535	2031	17	16	19	87	98	115	1.36133	0.0150188	0.0128205
chr2L:19534303:19534925:+@chr2L:19534979:19535159:+	FBgn0053116	55.0791	0.015	3	54	RI	4.72	7.49	0	622	180	2384	57	41	32	73	155	211	1.93516	0.0338518	0.0131579
chrX:21884429:21884586:+@chrX:21884675:21884858:+	FBgn0031191	17.0392	0.04	1	89	CI	8.95	NA	0	157	183	4619	13	12	8	15	23	44	2.86406	0.175824	0.0434783
chrX:9254966:9257152:-@chrX:9257214:9257526:-	FBgn0261260	7.74351	0.025	12	62	CI	9.1	NA	0	312	2186	4623	7	10	5	32	43	46	1.45234	0.0888716	0.0243902
chr2L:9243648:9243900:+@chr2L:9244263:9244586:+	FBgn0041092	21.3913	0.16	NA	363	SEflanking	NA	NA	0	252	323	5948	19	5	6	5	24	39	2.84687	0.355079	NA
chr2R:6713376:6713523:+@chr2R:6713585:6713819:+	FBgn0033557	18.5073	0.02	6	62	CI	7.8	8.93	0	147	234	1564	8	12	7	23	56	49	1.47383	0.0445463	0.0357143
chr3R:11029272:11030272:-@chr3R:11032071:11032169:-	FBgn0028984	222.255	0.015	1	1799	CI	7.64	5.09	0	98	1000	1481	32	15	14	75	100	143	1.18633	0.0181459	0.00854701
chr3L:18661253:18664288:-@chr3L:18664368:18664534:-	FBgn0042134	95.9256	0	3	80	CI	1.26	11.85	0	166	3035	3035	12	9	4	100	137	164	0.466309	0.0179624	0.013986
chr2L:14189095:14189233:-@chr2L:14195733:14196010:-	FBgn0016930	11.1841	0.165	8	6500	CI	10.03	10.53	0	277	138	4755	16	12	5	13	31	36	2.56484	0.199606	0.05
chr4:935923:936179:-@chr4:936243:936344:-	FBgn0023213	116.141	0.01	16	64	CI	5.83	9.58	0	101	256	256	50	27	6	80	122	169	1.03828	0.014728	0.0114943
chrX:550389:550522:+@chrX:551132:551932:+	FBgn0025637	456.171	0.075	1	610	CI	8.54	6.41	0	133	800	800	41	43	67	88	88	131	3.97578	0.0219896	0.00595238
chr3R:1619363:1619790:-@chr3R:1619844:1620039:-	FBgn0037378	74.5531	0.06	1	54	CI	4.88	5.99	0	195	427	760	29	23	28	25	35	106	3.04141	0.0322119	0.0322581
chr3R:19618649:19619951:+@chr3R:19620014:19620302:+	FBgn0015513	51.9766	0.015	5	63	CI	11.37	5.93	0	1302	288	7342	118	51	22	207	300	346	1.66133	0.0476	0.00421941
chr3R:17646369:17646745:-@chr3R:17648205:17648396:-	FBgn0013759	30.3327	0.02	1	1460	CI	6.9	7.43	0	191	376	37623	34	18	24	119	212	232	3.15469	0.204205	0.00719424
chr2R:8819307:8820867:-@chr2R:8820946:8821103:-	FBgn0033783	38.4896	0.005	2	79	CI	8.83	7.45	0	157	1560	2450	48	33	14	78	88	97	2.03281	0.0399122	0.0113636
chr2L:10424544:10424670:+@chr2L:10424734:10424930:+	FBgn0032246	174.504	0.05	4	64	RI	4.28	2.63	1	126	196	748	99	92	55	103	194	308	2.2875	0.0235794	0.00719424
chrX:2489759:2491048:+@chrX:2491360:2492660:+	FBgn0001404	28.6363	0.02	NA	312	CI	NA	NA	0	1289	1300	1784	24	6	7	25	55	119	1.20039	0.0348599	NA
chrX:12491379:12494474:+@chrX:12495616:12495930:+	FBgn0052654	15.5802	0.01	2	1142	SEflanking	8.54	NA	0	3095	314	8327	32	9	7	23	44	58	2.61641	0.215922	0.5
chr2R:15116929:15117158:+@chr2R:15122626:15122669:+	FBgn0010434	73.2794	0.11	2	5468	CI	9.25	8.52	2	229	43	8630	23	12	6	56	121	145	1.28359	0.0810528	0.0153846
chr2R:3993030:3993444:-@chr2R:3993522:3993823:-	FBgn0033260	41.1118	0.04	1	78	CI	9.15	5.34	0	301	414	3679	62	60	38	9	43	46	8.29844	0.388257	0.0588235
chrX:7810244:7810927:+@chrX:7810988:7811473:+	FBgn0029976	9.2543	0.01	10	61	CI	7.77	NA	0	683	485	1489	5	2	2	8	19	23	1.15508	0.196075	0.111111
chr2R:16521381:16521873:-@chr2R:16521936:16522193:-	FBgn0250850	27.9851	0.005	8	63	CI	9.11	7.06	0	257	492	492	13	17	11	14	42	59	2.18359	0.0506991	0.0416667
chrX:15744348:15744461:-@chrX:15744579:15744743:-	FBgn0026076	34.5348	0.005	NA	118	CI	NA	NA	0	164	113	697	3	1	4	10	27	45	0.764062	0.208086	NA
chr2L:6330771:6330886:+@chr2L:6331044:6331750:+	FBgn0265778	20.6568	0.02	7	158	CI	8.3	7.04	0	115	706	1745	10	10	4	10	41	48	1.5793	0.108818	0.05
chrX:6539076:6539371:+@chrX:6542050:6542157:+	FBgn0029881	28.4623	0.055	6	2679	CI	10.13	NA	0	295	107	4998	29	33	13	66	133	164	1.60195	0.0323556	0.0120482
chr3R:7804867:7805243:-@chr3R:7805301:7805742:-	FBgn0037973	15.8413	0.015	2	58	CI	7.77	5.14	0	441	376	947	1	2	2	3	3	11	2.33516	0.099944	0.2
chr2R:8376267:8376585:-@chr2R:8376651:8377386:-	FBgn0045063	28.4602	0.01	4	66	CI	10.67	9.63	0	735	318	1629	39	4	1	38	67	65	0.911133	0.0411742	0.0208333
chr2L:252589:253145:-@chr2L:253220:253385:-	FBgn0031238	22.7701	0.05	4	75	CI	9.11	4.59	0	165	556	556	11	9	7	3	21	39	2.46953	0.0737436	0.166667
chr2R:12053520:12053663:+@chr2R:12053728:12054551:+	FBgn0034083	31.3991	0.015	5	65	CI	8.56	7.36	0	143	823	3296	82	50	23	133	253	339	1.4168	0.021451	0.00684932
chr4:926654:927623:-@chr4:927700:928176:-	FBgn0025726	26.8678	0.095	4	77	CI	9.11	10.49	0	476	969	39173	251	177	91	56	88	147	20.875	0.717412	0.0140845
chrX:19147835:19148564:-@chrX:19148636:19149554:-	FBgn0031006	9.53521	0.045	10	72	RI	8.83	NA	0	918	729	2420	17	10	9	15	29	37	2.67461	0.0872412	0.04
chr3R:14015012:14016767:+@chr3R:14016831:14016987:+	FBgn0038578	23.856	0.015	2	64	CI	10.03	8.59	0	1755	156	156	16	11	9	15	40	81	1.5957	0.0258302	0.03125
chr3R:15679630:15681040:-@chr3R:15681103:15681267:-	FBgn0261984	31.5057	0	6	63	CI	3.34	7.07	0	164	1410	1410	11	6	1	40	73	67	0.558594	0.0184662	0.0204082
chr2R:2521152:2521453:-@chr2R:2521516:2523283:-	FBgn0026761	93.0821	0.02	2	63	CI	8.4	8.59	0	1767	301	301	10	10	11	34	56	99	1.12832	0.0270139	0.0217391
chr2R:9702149:9702291:+@chr2R:9702473:9702529:+	FBgn0261041	28.4775	0.05	15	182	SEflanking	7.4	3.26	0	142	56	4603	16	20	5	21	35	58	2.35781	0.110776	0.5
chr2R:11258401:11258544:-@chr2R:11258602:11258761:-	FBgn0011660	19.8406	0.03	2	58	CI	8.82	3.4	0	159	143	2965	26	29	21	15	44	85	3.41016	0.0686306	0.0588235
chr3R:1182734:1183005:-@chr3R:1183077:1183578:-	FBgn0250746	219.213	0	2	72	CI	9.68	10.62	0	501	271	271	10	19	6	55	78	177	0.805859	0.00773223	0.0153846
chr3R:18193258:18193390:+@chr3R:18196500:18197889:+	FBgn0003178	244.788	0.01	1	3110	CI	8.55	6.34	1	132	1389	1968	69	62	49	309	429	594	0.978809	0.00775502	0.0045977
chr3R:21677642:21678042:+@chr3R:21678150:21678296:+	FBgn0039379	18.8356	0.03	2	108	CI	6.95	11.5	0	400	146	1561	7	15	7	23	46	58	1.54863	0.0365942	0.0357143
chrX:1762903:1763275:+@chrX:1763331:1763911:+	FBgn0023513	13.5533	0.095	1	56	CI	10.1	6.79	0	372	580	3110	42	47	22	10	46	63	4.66563	0.103654	0.1
chr3L:21718655:21719050:-@chr3L:21719263:21719827:-	FBgn0037120	29.4147	0.03	NA	213	CI	NA	NA	0	564	395	1624	16	12	7	15	30	35	2.42617	0.105473	NA
chrX:5562431:5563259:+@chrX:5563335:5563978:+	FBgn0028474	47.5838	0.005	4	76	CI	8.83	NA	0	828	643	1350	10	7	1	44	66	109	0.537695	0.0188408	0.0188679
chrX:17743809:17743843:-@chrX:17743941:17744101:-	FBgn0030873	55.5246	0.035	NA	98	RI	NA	NA	0	160	34	1700	28	32	17	14	27	41	4.74062	0.120232	NA
chrX:22415331:22415517:+@chrX:22415655:22415944:+	FBgn0039965	61.6558	0.025	1	138	CI	10.47	NA	0	186	289	2767	17	12	13	22	39	64	2.31406	0.0512367	0.0333333
chr2L:2041647:2042569:+@chr2L:2042653:2042851:+	FBgn0003557	39.3301	0.01	5	84	RI	8.56	7.27	0	922	198	1719	36	44	30	17	72	101	3.46094	0.0422246	0.0344828
chr3R:5982298:5982683:+@chr3R:5982739:5983152:+	FBgn0086359	6.01305	0.055	6	56	RI	5.89	3.78	0	385	413	2117	8	5	1	3	6	17	2.48438	0.182705	0.25
chr3R:1512763:1513091:+@chr3R:1522749:1523207:+	FBgn0261261	8.75979	0.045	2	9658	CI	8.88	6.86	0	328	458	15810	4	2	1	6	12	15	2.53047	1.15493	0.0833333
chr3R:17844502:17844549:-@chr3R:17844714:17845104:-	FBgn0038922	67.3393	0.01	1	165	CI	7.82	10.08	0	390	47	2436	28	16	17	27	46	66	2.72812	0.0947978	0.027027
chr2R:4049184:4049729:-@chr2R:4049791:4049933:-	FBgn0033272	49.107	0.015	4	62	CI	2.13	7.26	0	142	545	545	11	15	6	23	35	64	1.59395	0.0193194	0.0344828
chr3R:18513264:18514122:-@chr3R:18514175:18515736:-	FBgn0039003	27.0655	0.025	3	53	CI	10.86	5.73	0	1561	858	858	21	23	16	20	50	71	2.54961	0.051235	0.04
chr2R:7467022:7467488:-@chr2R:7467554:7467675:-	FBgn0033636	28.838	0.005	NA	66	CI	NA	NA	0	121	466	2498	12	11	2	50	87	124	0.679688	0.0380478	NA
chrX:13478190:13478430:+@chrX:13478894:13479073:+	FBgn0086674	9.17343	0.025	5	464	CI	7.35	NA	0	240	179	8363	8	2	0	5	6	10	2.30547	0.399984	0.142857
chrX:11493871:11494359:+@chrX:11498345:11498706:+	FBgn0030318	43.2394	0.08	1	3986	CI	9.79	NA	0	488	361	1976	33	13	4	28	24	46	2.11875	0.0713214	0.025641
chr2L:21311753:21312043:+@chr2L:21312125:21312208:+	FBgn0000370	617.94	0.16	2	82	CI	4.88	-2.61	0	290	83	7402	195	206	2	156	214	240	2.93438	0.074453	0.00248756
chr2L:22817892:22818062:+@chr2L:22818113:22818230:+	FBgn0002566	51.8937	0.02	3	51	CI	8.4	7.3	0	170	117	17754	50	43	40	111	150	254	3.36563	0.144024	0.008
chr3L:7377749:7378081:+@chr3L:7378150:7378374:+	FBgn0016983	67.0052	0.01	7	69	CI	6.33	10.51	0	332	224	587	9	10	3	59	87	161	0.498633	0.00934525	0.0144928
chr3L:5754085:5754218:+@chr3L:5754274:5754986:+	FBgn0016756	81.7106	0.055	NA	56	CI	NA	NA	0	133	712	712	27	20	11	12	44	63	2.42422	0.0690301	NA
chr2L:15066937:15067689:-@chr2L:15067953:15068078:-	FBgn0024183	174.479	0.02	1	264	CI	6.12	9.6	0	125	752	4758	16	21	37	33	50	104	3.40078	0.0467522	0.00813008
chrX:13644619:13646055:-@chrX:13648863:13649439:-	FBgn0030520	82.0104	0.01	1	2808	CI	9.66	NA	0	576	1436	6445	44	37	54	97	134	186	2.86992	0.0677855	0.00666667
chr2L:11849958:11850048:+@chr2L:11850390:11851551:+	FBgn0032382	20.0775	0.02	1	342	CI	8.7	5.3	0	90	1161	2491	22	8	3	10	14	14	3.08984	0.261242	0.0625
chr2L:10331747:10331930:+@chr2L:10331988:10332674:+	FBgn0032222	69.7284	0.09	2	58	RI	5.61	8.89	0	183	686	1141	80	104	86	23	52	97	8.20625	0.106755	0.0277778
chr2L:4384085:4385259:-@chr2L:4385316:4385822:-	FBgn0031598	12.1113	0.08	2	57	RI	8.46	10.61	0	506	1174	2334	29	26	10	24	35	65	2.77305	0.0997081	0.04
chr2L:20336287:20336404:+@chr2L:20336464:20336549:+	FBgn0003475	31.3092	0.02	5	60	CI	11.01	-0.02	0	117	85	11922	28	26	9	102	146	230	1.51289	0.0638642	0.00900901
chr2L:814243:815221:-@chr2L:815275:815412:-	FBgn0031281	8.82272	0.025	NA	54	CI	NA	NA	0	137	978	1907	41	22	16	48	57	94	2.22109	0.037528	NA
chrX:11711269:11712049:+@chrX:11717316:11718511:+	FBgn0266019	7.57777	0.15	NA	5267	CI	NA	NA	1	780	1195	14177	10	1	5	49	62	67	1.10957	1.14658	NA
chr3R:4829739:4829797:+@chr3R:4829864:4830173:+	FBgn0037652	108.846	0.135	1	67	CI	9.77	3.34	0	58	309	1189	81	106	97	62	114	217	4.50547	0.0277431	0.0169492
chr2R:19755576:19755735:-@chr2R:19755985:19756126:-	FBgn0025352	124.426	0.025	1	250	CI	10.47	4.95	0	141	159	1564	49	57	69	84	100	175	3.58984	0.0322351	0.0104167
chr3L:12739998:12740303:-@chr3L:12740375:12740854:-	FBgn0010235	82.9828	0.01	4	72	RI	9.43	7.79	0	479	305	587	23	11	10	39	69	96	1.24707	0.0193018	0.0185185
chr2L:21668106:21668236:-@chr2L:21668293:21669238:-	FBgn0032957	17.8608	0.02	4	57	CI	9.25	3.97	0	945	130	4430	24	16	5	21	68	92	1.77891	0.106128	0.0454545
chr2R:15249475:15249567:+@chr2R:15249629:15250629:+	FBgn0034436	44.5784	0.02	NA	62	CI	NA	NA	0	92	1000	1000	9	7	12	25	61	78	1.27168	0.0232481	NA
chr2R:17372569:17373592:+@chr2R:17373649:17373775:+	FBgn0026369	27.2803	0.015	5	57	RI	9.65	6.15	0	1023	126	963	18	10	15	30	70	89	1.53242	0.025867	0.0277778
chr3R:1198314:1199897:-@chr3R:1199955:1200112:-	FBgn0086695	20.2941	0.035	2	58	CI	7.97	8.2	0	157	1583	1583	9	12	4	20	34	53	1.47344	0.0508017	0.04
chr2R:1901415:1902927:-@chr2R:1903082:1903194:-	FBgn0000043	853.802	0.005	1	155	CI	10.57	11.42	0	112	1512	1512	515	382	274	1155	1848	2761	1.32109	0.00534473	0.000715308
chr2R:6007556:6007863:+@chr2R:6007917:6008956:+	FBgn0033486	30.5711	0.01	5	54	RI	10.67	10.03	0	307	1039	1039	13	8	4	9	44	54	1.44531	0.08604	0.0666667
chrX:21898204:21898384:+@chrX:21898500:21898697:+	FBgn0027279	52.027	0.005	6	116	CI	8.68	NA	0	180	197	11465	14	3	5	42	50	53	1.50937	0.747757	0.015873
chr2R:1130980:1131105:-@chr2R:1133457:1133623:-	FBgn0053554	21.4081	0.075	3	2352	CI	9.82	4.51	0	166	125	65635	30	18	4	217	213	198	2.62812	0.187076	0.00362319
chrX:3849576:3850005:-@chrX:3850082:3850278:-	FBgn0029688	43.8653	0.03	9	77	CI	7	NA	0	196	429	429	49	46	24	33	70	95	2.9793	0.0466983	0.0263158
chr2R:17092515:17092804:+@chr2R:17092866:17093046:+	FBgn0265191	67.08	0	3	62	CI	9.49	9.59	0	289	180	5460	12	3	1	63	65	93	0.516504	0.0317646	0.0138889
chr2L:6451618:6451736:-@chr2L:6451797:6452055:-	FBgn0031814	6.01471	0.04	3	61	RI	9.27	7.64	0	258	118	3272	15	11	3	19	69	87	1.26816	0.0769504	0.047619
chr3R:14806092:14806350:-@chr3R:14806407:14806473:-	FBgn0038666	27.0147	0.055	3	57	CI	8.02	6.31	0	66	258	1648	7	5	6	17	32	41	1.41641	0.0692753	0.0384615
chr2L:4394196:4394489:+@chr2L:4394545:4395178:+	FBgn0022153	22.4466	0.025	1	56	CI	10.03	3.82	0	293	633	5942	22	23	27	45	48	64	4.03203	0.075271	0.0196078
chr3L:5490623:5491659:-@chr3L:5491828:5492058:-	FBgn0035608	619.901	0.01	1	169	CI	7.88	9.54	0	230	1036	1036	2	6	4	248	338	506	0.0911011	0.00749793	0.00340136
chr3L:20364772:20365119:-@chr3L:20365180:20365389:-	FBgn0001247	34.6456	0.005	13	61	CI	8.68	10.04	0	209	347	347	31	17	17	32	85	101	1.7209	0.0224665	0.03125
chr3L:2609735:2611159:-@chr3L:2611316:2611557:-	FBgn0011828	110.744	0.055	NA	157	CI	NA	NA	0	241	1424	9704	32	40	42	42	63	88	5.47656	0.155819	NA
chr2R:20881535:20881839:-@chr2R:20881930:20884669:-	FBgn0265434	233.439	0.01	9	91	CI	10.1	4.64	0	2739	304	3746	19	23	6	76	96	154	1.10312	0.024903	0.0113636
chr4:638974:639102:+@chr4:639162:639257:+	FBgn0025936	24.4232	0.02	9	60	RI	11.78	2.31	0	128	95	3934	39	19	5	44	91	113	1.52383	0.0557582	0.0178571
chr3R:5381726:5382260:+@chr3R:5382327:5382492:+	FBgn0037709	23.3103	0.025	2	67	CI	5.91	6.8	0	534	165	1171	11	27	16	6	34	63	3.30469	0.0815342	0.0416667
chr3R:6692531:6692682:-@chr3R:6694161:6694364:-	FBgn0037847	41.4611	0.075	1	1479	CI	10.67	-5.28	0	203	151	3605	3	4	5	17	10	32	1.89434	0.0490181	0.037037
chr3R:12864982:12865008:-@chr3R:12865069:12865228:-	FBgn0038470	20.1925	0.045	4	61	CI	5.73	10.49	0	159	26	2892	12	13	4	27	27	61	1.73789	0.0442397	0.0416667
chr3R:474898:475489:+@chr3R:476307:476456:+	FBgn0087013	175.509	0.065	NA	818	RI	NA	NA	1	591	149	4039	183	130	99	211	336	426	2.82031	0.0388397	NA
chr3L:17419010:17419179:+@chr3L:17419239:17419382:+	FBgn0040793	710.272	0.005	3	60	CI	9.77	5.68	0	169	143	143	35	45	45	166	177	315	1.34824	0.00829127	0.00558659
chrX:6730714:6731062:+@chrX:6731134:6731573:+	FBgn0263968	11.1417	0.015	NA	72	CI	NA	NA	0	348	439	1021	11	9	10	22	46	58	1.62148	0.0297934	NA
chr3R:1619030:1619298:-@chr3R:1619363:1619790:-	FBgn0037378	74.5531	0.045	2	65	CI	10.49	9.33	0	427	268	268	26	20	18	16	26	34	4.69219	0.071481	0.04
chr3L:13016583:13016625:+@chr3L:13016832:13016966:+	FBgn0260441	3512.34	0.105	2	207	CI	7.65	7.52	0	42	134	1030	130	104	70	871	900	1366	0.660742	0.0062254	0.00096432
chr3R:19994196:19994525:-@chr3R:19994579:19994776:-	FBgn0039160	133.544	0	3	54	RI	7.69	4.13	0	197	329	1128	20	18	14	67	81	169	1.14414	0.0243459	0.00934579
chr2R:5468771:5468922:+@chr2R:5468991:5469352:+	FBgn0033426	23.7303	0.035	6	69	RI	9.63	2.92	0	151	361	361	48	34	16	12	43	84	2.9207	0.0384939	0.0714286
chr2L:5950125:5951819:+@chr2L:5951877:5951997:+	FBgn0031752	16.9828	0.025	3	58	CI	9.84	2.67	0	1694	120	3358	34	19	12	26	58	78	2.36211	0.0561318	0.0344828
chr2R:17031050:17031641:+@chr2R:17031706:17032010:+	FBgn0021872	673.482	0.025	1	65	CI	9.72	5.33	0	591	304	1549	280	216	138	724	1370	1896	1.06914	0.00977482	0.00127389
chr3R:7715313:7715767:+@chr3R:7715865:7717080:+	FBgn0051368	13.9188	0.02	5	98	CI	9.49	10.48	0	454	1215	2239	11	5	3	13	37	40	1.32988	0.0676515	0.0769231
chr3L:1339460:1341861:-@chr3L:1341928:1342069:-	FBgn0035213	74.3282	0.03	2	67	CI	8.2	11.2	0	141	2401	2401	53	46	55	85	151	234	2.35469	0.0260215	0.01
chrX:19593853:19595521:-@chrX:19595577:19595788:-	FBgn0031060	14.8259	0.045	1	56	CI	10.9	NA	0	211	1668	1668	7	5	18	7	5	15	8.92812	0.255001	0.125
chr3R:10716056:10716148:+@chr3R:10716418:10716624:+	FBgn0038271	296.06	0.015	2	270	RI	9.72	6.52	1	92	206	1691	79	88	81	73	112	162	4.69062	0.0532933	0.00990099
chr2L:6480929:6481250:+@chr2L:6481983:6486111:+	FBgn0031820	5.42568	0.05	1	733	CI	7.96	5.4	1	321	4128	5593	13	11	10	16	21	32	3.70469	0.196653	0.0555556
chr2L:8368758:8369030:+@chr2L:8369223:8369560:+	FBgn0260439	247.936	0.06	NA	193	CI	NA	NA	0	272	337	867	42	68	41	58	144	220	2.27031	0.0304414	NA
chr2L:21660123:21661200:+@chr2L:21661348:21661465:+	FBgn0032956	91.8957	0.03	4	148	CI	9.49	5.59	0	1077	117	2350	36	30	25	94	259	322	1.05664	0.0217732	0.00961538
chr3L:21295580:21296649:-@chr3L:21297010:21297145:-	FBgn0037070	39.8708	0.015	1	361	CI	9.09	7.29	0	135	1069	1764	13	13	11	17	22	33	3.37734	0.101468	0.0416667
chr2R:19561809:19561865:+@chr2R:19561937:19562142:+	FBgn0266377	43.9226	0.01	6	72	CI	10.22	7.44	0	56	205	6430	7	3	3	26	67	106	0.750781	0.0522383	0.04
chr3R:21040047:21040654:-@chr3R:21040717:21040910:-	FBgn0039291	53.649	0.01	1	63	CI	10.77	5.23	0	193	607	607	14	16	14	35	53	105	1.55273	0.0202843	0.025
chr3L:17614201:17614352:-@chr3L:17614410:17614605:-	FBgn0036740	224.507	0.01	NA	58	CI	NA	NA	0	195	151	1129	20	27	31	120	169	368	0.916309	0.0133031	NA
chr3R:6133528:6134839:-@chr3R:6134904:6135420:-	FBgn0037807	105.648	0.005	3	65	CI	8.83	8.07	0	516	1311	1311	19	19	4	98	120	141	0.697852	0.00940499	0.00917431
chr3R:23530312:23531109:-@chr3R:23531186:23531573:-	FBgn0039543	10.5145	0.04	NA	77	CI	NA	NA	0	387	797	2008	1	4	1	6	12	22	1.09727	0.104037	NA
chrX:7180799:7181131:+@chrX:7181205:7181378:+	FBgn0029942	48.0963	0.02	NA	74	RI	NA	NA	0	332	173	945	10	14	5	11	25	54	1.96211	0.054966	NA
chr3R:19886733:19886988:+@chr3R:19887045:19887349:+	FBgn0040283	86.892	0.015	6	57	RI	9.72	6.86	0	255	304	1492	56	40	28	45	112	177	2.16758	0.0411191	0.0178571
chr3R:19822314:19822427:+@chr3R:19822488:19822739:+	FBgn0051184	272.254	0.01	2	61	CI	9.3	4.86	0	113	251	251	22	22	15	56	74	186	1.25898	0.0203438	0.0125
chrX:4263207:4263420:+@chrX:4263486:4263639:+	FBgn0029706	20.2745	0.025	3	66	CI	8.68	NA	0	213	153	1683	8	4	3	11	16	32	1.53594	0.0839188	0.0714286
chr2L:14344183:14344416:+@chr2L:14344481:14345795:+	FBgn0028916	9.01145	0.02	NA	65	CI	NA	NA	0	233	1314	1314	12	8	1	19	32	33	1.16055	0.0372044	NA
chr2L:5272986:5273097:-@chr2L:5273161:5273554:-	FBgn0000228	12.3703	0.045	NA	64	RI	NA	NA	0	393	111	1369	5	1	1	4	8	6	1.73711	0.17299	NA
chrX:5978824:5982246:-@chrX:5982305:5984234:-	FBgn0029840	8.42256	0.035	1	59	CI	11.08	NA	0	1929	3422	5579	12	10	11	47	58	62	1.74727	0.05251	0.0178571
chr3R:20679598:20679808:+@chr3R:20679947:20680591:+	FBgn0039234	73.7117	0.05	NA	139	CI	NA	NA	0	210	644	644	17	14	10	20	37	39	2.49844	0.0508188	NA
chrX:9047271:9048273:-@chrX:9048413:9048718:-	FBgn0004828	949.123	0	2	140	RI	9.22	NA	1	305	1002	1717	53	41	29	305	332	473	0.77793	0.00951201	0.0026455
chr3L:14033164:14033694:+@chr3L:14034527:14034622:+	FBgn0026418	125.245	0.025	4	833	SEflanking	10.03	8.95	0	530	95	2259	64	42	20	158	283	391	1.01641	0.0162017	0.00520833
chr4:232265:232420:+@chr4:232480:232608:+	FBgn0024811	76.8674	0.04	NA	60	CI	NA	NA	0	155	128	1311	19	16	13	28	55	78	1.89883	0.0613877	NA
chr3L:16836203:16836478:+@chr3L:16836610:16836830:+	FBgn0036666	140.003	0.035	4	132	CI	8.59	4.3	0	275	220	1075	40	46	33	45	82	128	2.86133	0.0358274	0.0181818
chr3R:5601435:5602407:+@chr3R:5602468:5602727:+	FBgn0037751	10.5699	0.065	2	61	CI	9.86	10.15	0	972	259	1197	8	8	15	5	8	19	6.65156	0.226812	0.125
chr2R:20855968:20856574:-@chr2R:20856641:20856747:-	FBgn0002607	4338.14	0.09	2	67	CI	8.4	7.89	0	106	606	1174	128	120	113	1293	1429	2108	0.558203	0.00332097	0.000668896
chr2R:7509122:7509976:-@chr2R:7510036:7511407:-	FBgn0033638	6.76573	0.02	5	60	RI	10.67	4.56	0	1371	854	2992	34	12	15	23	60	75	2.3168	0.103334	0.03125
chr3R:2207404:2207991:+@chr3R:2208050:2208326:+	FBgn0010282	61.952	0.015	3	59	CI	7.36	8.04	0	587	276	276	9	12	13	28	57	119	1.19805	0.0201778	0.08
chrX:12802019:12802721:-@chrX:12802969:12803213:-	FBgn0030434	55.8769	0.01	2	248	CI	6.75	NA	0	244	702	702	14	7	8	19	36	82	1.35547	0.0309125	0.0416667
chr2R:10060089:10060188:+@chr2R:10060252:10060428:+	FBgn0033906	306.969	0.005	NA	64	CI	NA	NA	0	99	176	251	47	36	20	139	200	324	0.938281	0.0085422	NA
chr3R:20065542:20066766:+@chr3R:20066840:20066922:+	FBgn0043884	33.2265	0.03	10	74	CI	9.63	0.04	0	1224	82	9130	132	67	47	93	148	135	4.61875	0.151289	0.00819672
chr3R:1095838:1099804:-@chr3R:1099871:1100040:-	FBgn0013576	85.9539	0.045	NA	67	CI	NA	NA	0	169	3966	3966	26	19	25	35	80	139	2.17344	0.0899191	NA
chr3L:23321814:23322498:-@chr3L:23322986:23323189:-	FBgn0010215	105.008	0.1	4	488	CI	9.54	4.88	0	203	684	10752	37	43	25	40	83	116	3.97734	0.170668	0.0188679
chr2R:19797201:19797332:+@chr2R:19799200:19799391:+	FBgn0261794	117.617	0.15	2	1868	CI	6.95	8.06	0	131	191	13389	91	82	42	83	147	177	4.73516	0.165306	0.00694444
chrX:2607529:2607654:-@chrX:2607711:2607993:-	FBgn0024998	18.8109	0.075	1	57	CI	9.93	NA	0	282	125	1865	16	25	21	14	27	62	3.94375	0.0708501	0.04
chr3R:26289137:26290003:+@chr3R:26290429:26291039:+	FBgn0039774	195.035	0	4	426	RI	9.25	3.9	0	866	610	1029	46	14	14	56	88	122	1.42578	0.023545	0.0144928
chr3R:3322446:3322596:-@chr3R:3322775:3323087:-	FBgn0015577	27.5453	0.055	2	179	CI	7.8	6.46	0	312	150	2953	27	14	11	79	186	238	0.826172	0.0310317	0.0102041
chr2R:11745257:11745515:-@chr2R:11745695:11746398:-	FBgn0022160	42.8681	0.01	7	180	CI	9.6	5.77	0	703	258	258	12	10	3	14	37	62	1.25547	0.0238944	0.0555556
chr2L:2735814:2736430:+@chr2L:2737032:2737321:+	FBgn0031449	41.6944	0.08	NA	602	CI	NA	NA	0	616	289	2798	29	11	8	13	71	89	1.80313	0.103326	NA
chr2L:5051637:5052314:-@chr2L:5052655:5052780:-	FBgn0022023	386.085	0.01	NA	341	CI	NA	NA	0	125	677	1121	100	57	65	211	317	415	1.50977	0.0132961	NA
chr2L:16621836:16622841:+@chr2L:16634726:16634776:+	FBgn0259735	25.9455	0.125	3	11885	CI	11.45	11.27	0	1005	50	28492	44	39	21	79	97	100	5.58281	0.430916	0.0428571
chrX:21904472:21904705:+@chrX:21905205:21905769:+	FBgn0027279	52.027	0.015	NA	500	CI	NA	NA	0	233	564	4760	6	6	4	13	13	34	2.19062	0.143244	NA
chr3R:1064176:1064919:-@chr3R:1065214:1065341:-	FBgn0260462	259.866	0	3	295	RI	7.47	6.94	0	127	743	1546	26	30	9	119	140	195	0.920117	0.0138198	0.0075188
chr2R:5059983:5060750:-@chr2R:5060811:5060979:-	FBgn0015477	30.9523	0.02	12	61	CI	9.25	7.07	0	168	767	5482	19	5	7	49	64	56	1.39629	0.0942999	0.0149254
chr2R:9957453:9957784:-@chr2R:9957857:9957982:-	FBgn0040752	21.9866	0.015	4	73	CI	11.08	2.88	0	125	331	9823	20	19	11	97	186	229	1.09141	0.0624053	0.00961538
chr2R:1652993:1653124:+@chr2R:1653185:1653384:+	FBgn0266580	152.043	0.005	6	61	CI	10.75	4.99	0	131	199	8644	93	64	35	360	668	716	1.10547	0.0258653	0.00571429
chr2R:12213324:12213569:-@chr2R:12213640:12213778:-	FBgn0262511	106.014	0.01	NA	71	CI	NA	NA	0	138	245	1251	15	11	7	16	32	46	2.00625	0.0546882	NA
chr3R:12897354:12898239:-@chr3R:12898304:12898397:-	FBgn0038473	107.025	0	1	65	CI	9.35	4.8	0	93	885	1994	79	74	84	279	522	777	1.14258	0.0157146	0.00285714
chrX:7628956:7629368:+@chrX:7629797:7630512:+	FBgn0029959	63.4403	0.11	NA	429	CI	NA	NA	0	412	715	992	16	28	30	6	10	47	6.8375	0.145599	NA
chr2L:111907:112019:+@chr2L:112690:113369:+	FBgn0005278	152.302	0.045	6	671	SEflanking	5.29	4.06	0	112	679	1742	61	29	18	65	115	156	1.725	0.0169795	0.0120482
chr3R:11094384:11094733:+@chr3R:11094803:11095062:+	FBgn0038312	18.6435	0.035	1	70	CI	10.06	5.08	0	349	259	1451	10	14	14	8	39	56	2.63281	0.1441	0.0769231
chr2R:5155160:5155481:-@chr2R:5171333:5171634:-	FBgn0020621	18.4295	0.175	2	15852	CI	10.67	12.34	2	301	321	15666	38	11	5	57	104	131	2.11797	0.170329	0.0714286
chrX:16274571:16274794:+@chrX:16274860:16275815:+	FBgn0004598	24.911	0.035	NA	66	CI	NA	NA	0	223	955	955	29	24	9	20	53	78	2.06094	0.0394068	NA
chr3L:18991608:18991951:-@chr3L:18992046:18993342:-	FBgn0036838	31.7183	0.03	2	95	CI	9.73	10.64	0	1296	343	976	38	42	33	18	56	117	3.41328	0.0486777	0.0285714
chr2R:17038488:17038589:-@chr2R:17041390:17041671:-	FBgn0050389	22.8343	0.005	7	2801	CI	11.81	7.78	0	281	101	2819	16	7	3	35	79	90	0.880664	0.049874	0.027027
chr2L:108089:108226:+@chr2L:108588:108809:+	FBgn0005278	152.302	0.14	NA	362	CI	NA	NA	1	137	221	5844	94	104	102	117	215	403	3.32969	0.0700588	NA
chr2L:4386182:4386705:-@chr2L:4386764:4387070:-	FBgn0261976	23.5915	0.01	NA	59	CI	NA	NA	0	306	523	523	2	5	15	11	29	40	2.28906	0.0263727	NA
chr3R:5091840:5092251:-@chr3R:5092318:5092626:-	FBgn0010803	82.3258	0.01	1	67	CI	5.17	3.69	0	308	411	1502	46	52	39	69	109	180	2.49063	0.0312899	0.0263158
chr3R:23428736:23428893:-@chr3R:23428973:23429209:-	FBgn0039528	16.0338	0.055	2	80	CI	9.6	7.25	0	236	157	5608	24	9	2	14	22	20	2.64766	0.203031	0.04
chr2R:16495175:16495338:-@chr2R:16495399:16495512:-	FBgn0050147	8.13335	0.05	7	61	RI	8.56	9.56	0	113	163	952	8	5	4	3	16	13	2.94687	0.150611	0.111111
chr2L:11272685:11276075:+@chr2L:11276137:11276337:+	FBgn0040233	8.43188	0.09	5	62	CI	10.65	7.75	0	3390	200	1709	19	13	13	9	43	70	2.37617	0.103015	0.0833333
chr3R:20696924:20697875:-@chr3R:20697941:20698133:-	FBgn0039240	20.3235	0.08	NA	66	CI	NA	NA	0	192	951	951	14	11	15	6	17	41	3.78281	0.156306	NA
chrX:14924619:14924880:+@chrX:14924944:14925101:+	FBgn0052594	31.7831	0.02	2	64	CI	10.91	NA	0	261	157	11149	14	10	8	58	115	92	1.3875	0.0597062	0.0119048
chr3R:1045921:1046192:+@chr3R:1046258:1046407:+	FBgn0037297	31.7056	0.045	3	66	RI	2.76	11.75	0	271	149	1012	11	6	8	11	14	18	3.69453	0.11985	0.05
chr2R:20915226:20916007:+@chr2R:20916065:20916414:+	FBgn0004055	81.5142	0.01	3	58	CI	10.24	1.58	0	781	349	3195	2	1	0	14	17	26	0.361719	0.0609622	0.05
chrX:20298827:20299021:-@chrX:20299078:20299199:-	FBgn0031115	30.4295	0.035	4	57	RI	4.42	NA	0	121	194	583	19	17	16	6	14	49	4.06562	0.0988771	0.333333
chr2R:5005422:5005662:+@chr2R:5005720:5005954:+	FBgn0003612	59.7259	0.005	3	58	CI	6.43	3.31	0	240	234	3785	28	29	23	59	96	123	2.16016	0.0616328	0.0166667
chr2R:20086800:20087211:+@chr2R:20087268:20087389:+	FBgn0034989	23.7448	0.045	3	57	RI	5.26	-1.99	0	411	121	2442	8	5	3	31	46	73	0.774414	0.0431676	0.0344828
chr2R:5319995:5320569:+@chr2R:5320635:5320805:+	FBgn0017558	18.1476	0.015	NA	66	CI	NA	NA	0	574	170	1508	11	6	2	17	30	48	1.15234	0.066848	NA
chrX:8478489:8478608:+@chrX:8478876:8478956:+	FBgn0030052	136.025	0.145	3	268	SEflanking	9.3	NA	0	119	80	3685	73	70	34	104	220	345	1.8875	0.0300977	1
chr3L:837861:838624:+@chr3L:839250:839747:+	FBgn0035165	364.845	0.025	1	626	CI	10.03	4.68	0	763	497	681	106	86	66	324	476	851	1.03223	0.00649628	0.00262467
chr2R:11757000:11760970:-@chr2R:11761040:11761182:-	FBgn0264089	34.9863	0.005	NA	70	CI	NA	NA	0	142	3970	3970	15	14	2	39	47	53	1.3543	0.0727687	NA
chr2R:20828148:20828577:-@chr2R:20828645:20829643:-	FBgn0035083	363.273	0.025	NA	68	CI	NA	NA	0	998	429	429	44	42	61	121	195	340	1.56875	0.00921209	NA
chrX:1757060:1757738:-@chrX:1757802:1758140:-	FBgn0023515	8.93433	0.025	3	64	RI	5.04	4.73	0	338	678	1696	12	9	11	13	13	28	3.90313	0.0892851	0.0625
chr2L:22425011:22427795:-@chr2L:22428349:22428786:-	FBgn0064225	7978.97	0.03	NA	554	CI	NA	NA	0	437	2784	2784	875	805	908	3169	3161	4386	1.89766	0.00580633	NA
chr2R:17961043:17961409:-@chr2R:17961472:17962204:-	FBgn0034689	37.4443	0.01	3	63	CI	5.28	7.52	0	732	366	366	6	6	4	17	21	49	1.23027	0.0250576	0.047619
chr3R:25143558:25143691:-@chr3R:25143791:25143862:-	FBgn0015622	243.391	0.015	3	100	SEflanking	11.37	4.72	0	71	133	2715	139	109	60	225	383	479	1.80469	0.0169793	0.00364964
chr3L:1872354:1872470:-@chr3L:1872582:1872735:-	FBgn0002183	152.184	0.095	7	112	SEflanking	9.46	6.06	0	153	116	896	131	117	103	48	102	170	5.75625	0.0444012	0.0294118
chr2L:5040648:5041539:-@chr2L:5041689:5041836:-	FBgn0031673	113.914	0	3	150	SEflanking	6.43	3.27	0	147	891	891	15	16	8	50	85	104	1.03906	0.0217295	0.0185185
chr3R:18207062:18207246:+@chr3R:18207307:18207753:+	FBgn0263047	7.94877	0.035	1	61	CI	5.96	5.87	0	184	446	446	5	5	4	14	21	16	1.95586	0.066933	0.0416667
chr2L:21634726:21635035:+@chr2L:21635092:21635210:+	FBgn0023416	26.3315	0.04	5	57	RI	4.86	4.12	0	309	118	12872	17	16	7	13	29	40	4.36484	0.388547	0.0526316
chr3R:5161622:5161751:+@chr3R:5161880:5161974:+	FBgn0037680	22.0045	0.1	4	129	RI	8.27	4.44	0	129	94	1301	32	18	22	13	27	71	3.56328	0.0754139	0.0625
chr3R:14982188:14982268:-@chr3R:14982381:14982534:-	FBgn0038683	25.5185	0.035	NA	113	CI	NA	NA	0	153	80	2449	31	22	18	30	105	146	1.79102	0.0419387	NA
chr3R:7057916:7057990:+@chr3R:7058063:7058261:+	FBgn0037883	23.7941	0.05	2	73	CI	10.91	7.44	0	74	198	198	9	8	7	6	6	15	4.79844	0.0991942	0.142857
chr3R:19581879:19582053:-@chr3R:19582120:19582865:-	FBgn0028475	42.7485	0.02	2	67	CI	3.75	5.12	0	745	174	1708	16	13	13	29	64	100	1.53281	0.0460971	0.0243902
chr2L:7988393:7989177:-@chr2L:7989243:7989551:-	FBgn0031969	35.8416	0.01	3	66	CI	10.16	6.28	0	308	784	2391	28	12	12	50	118	169	1.1168	0.0553605	0.0135135
chr2R:17997092:17997528:-@chr2R:17997711:17997865:-	FBgn0243516	26.2302	0.015	6	183	RI	4.57	5.91	0	154	436	3916	25	11	9	17	88	55	2.08516	0.135216	0.0277778
chrX:16777528:16778034:-@chrX:16778097:16778398:-	FBgn0030800	15.304	0.065	1	63	CI	9.6	NA	0	301	506	1492	32	19	37	8	16	46	7.20625	0.160009	0.0769231
chrX:11920659:11922072:-@chrX:11922457:11923065:-	FBgn0030366	28.8861	0.015	1	385	CI	10.22	NA	0	608	1413	5202	69	40	24	78	184	196	2.06094	0.0712707	0.0113636
chr3L:19581780:19581871:+@chr3L:19581931:19582211:+	FBgn0036888	119.209	0.015	7	60	CI	9.06	10.56	0	91	280	280	31	25	32	54	108	195	1.62559	0.0163548	0.0147059
chrX:15464413:15465518:-@chrX:15465597:15466182:-	FBgn0030654	6.50213	0.145	NA	79	CI	NA	NA	0	585	1105	1105	2	1	2	2	1	6	3.82031	0.182323	NA
chrX:9061191:9063295:+@chrX:9063499:9064018:+	FBgn0026206	8.13299	0.015	4	204	CI	10.13	NA	0	2104	519	19843	7	6	3	40	88	85	1.23145	0.168994	0.0222222
chrX:365052:365944:-@chrX:366159:366594:-	FBgn0266572	18.9173	0.06	10	215	CI	7.8	8.18	0	435	892	892	17	20	8	8	28	43	2.81953	0.0613946	0.0714286
chr2R:13337042:13337213:-@chr2R:13337274:13337528:-	FBgn0028956	35.5886	0.05	5	61	CI	9.49	8.35	0	254	171	1175	44	34	32	33	100	124	2.61953	0.0494072	0.0277778
chr3R:20172803:20173012:-@chr3R:20173127:20173316:-	FBgn0039186	53.1227	0.035	3	115	RI	10.51	-1.63	0	189	209	3395	60	72	77	35	89	149	5.26719	0.136345	0.0222222
chr3R:12087984:12088808:-@chr3R:12088869:12089343:-	FBgn0040237	90.1357	0	2	61	CI	9.1	7.59	0	474	824	1731	34	23	24	97	147	216	1.22422	0.019315	0.00840336
chr3R:20146698:20147505:+@chr3R:20147585:20147681:+	FBgn0011785	42.0971	0.02	6	80	CI	10.67	6.12	0	807	96	6756	25	11	22	60	92	96	2.11836	0.0782281	0.0133333
chr3L:16773605:16773890:+@chr3L:16774563:16774685:+	FBgn0036661	273.587	0.11	NA	673	RI	NA	NA	0	285	122	956	61	91	48	93	111	201	2.975	0.0199678	NA
chr2R:19820097:19820114:-@chr2R:19820190:19820337:-	FBgn0263006	199.618	0.035	NA	76	CI	NA	NA	0	147	17	7514	38	27	16	101	123	75	2.35547	0.100021	NA
chrX:16832529:16834024:-@chrX:16834537:16834906:-	FBgn0030805	16.1566	0.015	NA	513	CI	NA	NA	0	369	1495	1747	5	5	5	14	25	40	1.38359	0.0599341	NA
chr3L:8506974:8507741:-@chr3L:8507800:8508021:-	FBgn0035902	8.10095	0.02	1	59	CI	10.57	3.61	0	221	767	767	6	5	1	4	10	23	1.73828	0.0655046	0.1
chr3R:20076455:20077800:-@chr3R:20077867:20078024:-	FBgn0039175	82.6623	0.02	3	67	RI	9.72	5.17	0	157	1345	1618	60	54	36	25	62	66	5.24375	0.0642329	0.0294118
chr3R:7384148:7384406:+@chr3R:7384479:7385599:+	FBgn0037911	10.0779	0.02	2	73	RI	10.9	4.96	0	258	1120	1120	12	22	3	8	17	34	2.6668	0.0907139	0.0833333
chr2R:9435749:9436399:-@chr2R:9436459:9437041:-	FBgn0053156	12.1184	0.025	3	60	CI	8.23	8.12	0	582	650	650	6	6	1	7	27	42	1.10684	0.0522557	0.1
chrX:1246687:1247231:-@chrX:1247289:1248014:-	FBgn0024365	23.0685	0.12	1	58	CI	-16.23	8.12	0	725	544	3575	18	15	8	30	62	92	1.61406	0.0739149	0.027027
chr2L:1150379:1150559:-@chr2L:1150617:1150677:-	FBgn0031309	81.5264	0.055	1	58	CI	7.64	2.88	0	60	180	1114	82	89	72	124	159	272	2.82812	0.0160658	0.00699301
chr2R:8495421:8495502:+@chr2R:8495561:8495683:+	FBgn0027356	11.1287	0.03	6	59	RI	3.87	5.49	0	81	122	4012	3	3	0	13	22	23	0.683594	0.0724792	0.0625
chr2L:6342727:6343069:+@chr2L:6344159:6344283:+	FBgn0015623	91.7536	0.015	3	1090	RI	10.49	8.6	0	342	124	2121	7	4	5	58	84	89	0.542773	0.0192144	0.0144928
chr3L:23741524:23741816:+@chr3L:23741872:23742158:+	FBgn0040056	60.1586	0.08	7	56	RI	8.76	3.68	0	292	286	286	20	13	14	26	45	81	1.84922	0.0381429	0.0294118
chr2L:17442404:17442582:-@chr2L:17442652:17443005:-	FBgn0260632	35.1348	0.015	2	70	CI	11.11	10.64	0	353	178	5752	53	31	11	94	150	181	1.58887	0.043239	0.00699301
chrX:15883887:15883983:-@chrX:15885116:15885415:-	FBgn0030719	141.484	0.065	2	1133	CI	10.36	NA	0	299	96	2942	32	19	10	72	137	174	1.10312	0.0383436	0.0126582
chr2R:19956573:19956857:+@chr2R:19957262:19957465:+	FBgn0034971	168.563	0.045	1	405	CI	8.39	6.85	0	284	203	3813	158	170	136	276	347	488	3.075	0.0352141	0.00340136
chr2R:15370673:15370791:+@chr2R:15370854:15371978:+	FBgn0260934	78.6106	0.01	15	63	RI	8.14	8.48	0	118	1124	2337	35	16	7	32	77	82	1.61719	0.0701186	0.0227273
chr3R:14231786:14233938:-@chr3R:14233997:14234162:-	FBgn0051122	17.3174	0.05	4	59	CI	10.24	-8.19	0	165	2152	2152	30	19	13	34	68	74	2.09414	0.060007	0.0243902
chr3R:8811763:8812152:+@chr3R:8812211:8812431:+	FBgn0051342	29.2013	0.02	1	59	CI	8.23	6.76	0	389	220	5054	56	49	30	45	93	121	3.45078	0.108379	0.0135135
chr2R:12083889:12084077:+@chr2R:12084197:12084433:+	FBgn0265177	111.916	0.05	1	120	CI	3.24	7.82	0	188	236	236	13	12	24	24	26	33	5.09844	0.0615035	0.0212766
chr2L:9952072:9952698:-@chr2L:9952758:9953047:-	FBgn0032168	20.9463	0.055	NA	60	CI	NA	NA	0	289	626	626	11	14	7	26	46	101	1.26523	0.0340309	NA
chr3R:8784794:8784950:-@chr3R:8785015:8786039:-	FBgn0040493	90.8261	0	2	65	CI	6.9	7.61	0	1024	156	9186	12	8	14	107	118	195	0.900195	0.0499176	0.00917431
chrX:20392655:20393068:-@chrX:20393291:20393472:-	FBgn0026323	29.7378	0.015	4	223	RI	9.22	NA	0	181	413	6133	17	11	9	35	57	73	1.83574	0.151206	0.0222222
chr2R:125524:125714:-@chr2R:125778:125967:-	FBgn0262117	31.3085	0.015	4	64	CI	2.44	4.3	0	189	190	2430	30	20	9	51	82	96	1.53242	0.0305882	0.0322581
chr3R:25057887:25058529:+@chr3R:25058585:25061024:+	FBgn0028476	17.9339	0.015	NA	56	CI	NA	NA	0	642	2439	2439	24	13	8	46	88	116	1.18828	0.0407225	NA
chr3R:14582827:14583287:-@chr3R:14583350:14583635:-	FBgn0038651	17.2336	0.04	3	63	CI	0.91	8.67	0	285	460	7129	5	5	5	54	62	57	0.907324	0.0415465	0.015625
chr2R:11914640:11914768:-@chr2R:11914842:11915076:-	FBgn0034068	53.3222	0.095	3	74	RI	9.1	-0.3	0	234	128	2635	55	60	63	24	91	106	5.425	0.0886712	0.015625
