# Supplementary material for: The kinetics of pre-mRNA splicing in the Drosophila genome and the influence of gene architecture
Source: eLife. 2017 Dec 27;6:e32537. doi: 10.7554/eLife.32537 (PMC5762160; doi:10.7554/eLife.32537)
Supplement: Supplementary file 2. — Summary output from clusterProfiler for significantly enriched biological process gene ontology categories. [file elife-32537-supp2.xls]

## Sheet: SupplementaryTable2
Supplementary Table 2
ID	Description	GeneRatio	BgRatio	pvalue	p.adjust	qvalue	Count
GO:0043170	macromolecule metabolic process	1712/3583	2186/5118	7.2609e-30	4.85576e-27	4.39458e-27	1712
GO:0071704	organic substance metabolic process	2061/3583	2680/5118	8.93589e-30	4.85576e-27	4.39458e-27	2061
GO:0044238	primary metabolic process	1954/3583	2537/5118	8.48875e-28	3.84399e-25	3.4789e-25	1954
GO:0044260	cellular macromolecule metabolic process	1608/3583	2052/5118	2.23083e-27	8.65883e-25	7.83644e-25	1608
GO:0044237	cellular metabolic process	1986/3583	2586/5118	4.3905e-27	1.49112e-24	1.3495e-24	1986
GO:0044699	single-organism process	2559/3583	3432/5118	7.33513e-24	2.21439e-21	2.00408e-21	2559
GO:0090304	nucleic acid metabolic process	876/3583	1069/5118	2.25402e-23	6.12417e-21	5.54252e-21	876
GO:0046483	heterocycle metabolic process	1032/3583	1284/5118	4.23314e-22	1.04559e-19	9.46279e-20	1032
GO:1901360	organic cyclic compound metabolic process	1063/3583	1329/5118	1.99905e-21	4.52618e-19	4.0963e-19	1063
GO:0006725	cellular aromatic compound metabolic process	1043/3583	1304/5118	6.12733e-21	1.28061e-18	1.15898e-18	1043
GO:0006139	nucleobase-containing compound metabolic process	995/3583	1242/5118	3.06365e-20	5.94568e-18	5.38098e-18	995
GO:0044763	single-organism cellular process	2250/3583	3011/5118	1.16815e-18	2.11591e-16	1.91495e-16	2250
GO:0006807	nitrogen compound metabolic process	1268/3583	1630/5118	2.05019e-17	3.48147e-15	3.15081e-15	1268
GO:0016070	RNA metabolic process	754/3583	930/5118	2.51339e-17	4.01699e-15	3.63547e-15	754
GO:0034641	cellular nitrogen compound metabolic process	1206/3583	1547/5118	6.19303e-17	9.34804e-15	8.46019e-15	1206
GO:0006396	RNA processing	293/3583	338/5118	9.74041e-14	1.39288e-11	1.26059e-11	293
GO:0010467	gene expression	929/3583	1196/5118	1.0033e-11	1.36298e-09	1.23353e-09	929
GO:0034660	ncRNA metabolic process	125/3583	136/5118	3.09806e-10	4.0083e-08	3.6276e-08	125
GO:0030163	protein catabolic process	178/3583	202/5118	4.78748e-10	5.91254e-08	5.35098e-08	178
GO:0044265	cellular macromolecule catabolic process	211/3583	244/5118	5.97976e-10	7.06392e-08	6.39301e-08	211
GO:0006508	proteolysis	277/3583	330/5118	1.2917e-09	1.3321e-07	1.20558e-07	277
GO:0043632	modification-dependent macromolecule catabolic process	166/3583	188/5118	1.32377e-09	1.3321e-07	1.20558e-07	166
GO:0044257	cellular protein catabolic process	166/3583	188/5118	1.32377e-09	1.3321e-07	1.20558e-07	166
GO:0051603	proteolysis involved in cellular protein catabolic process	166/3583	188/5118	1.32377e-09	1.3321e-07	1.20558e-07	166
GO:0019941	modification-dependent protein catabolic process	165/3583	187/5118	1.69052e-09	1.64041e-07	1.4846e-07	165
GO:0006511	ubiquitin-dependent protein catabolic process	162/3583	184/5118	3.50463e-09	3.28348e-07	2.97162e-07	162
GO:0016071	mRNA metabolic process	228/3583	270/5118	1.40058e-08	1.26845e-06	1.14798e-06	228
GO:0009057	macromolecule catabolic process	227/3583	269/5118	1.71413e-08	1.50235e-06	1.35967e-06	227
GO:0006259	DNA metabolic process	177/3583	205/5118	2.03956e-08	1.73171e-06	1.56724e-06	177
GO:0051276	chromosome organization	296/3583	360/5118	2.98586e-08	2.45836e-06	2.22487e-06	296
GO:0006281	DNA repair	102/3583	112/5118	5.26289e-08	4.20566e-06	3.80622e-06	102
GO:0071840	cellular component organization or biogenesis	1269/3583	1698/5118	9.37383e-08	7.27677e-06	6.58564e-06	1269
GO:1901575	organic substance catabolic process	294/3583	360/5118	1.25975e-07	9.50758e-06	8.60458e-06	294
GO:0043161	proteasome-mediated ubiquitin-dependent protein catabolic process	103/3583	114/5118	1.29955e-07	9.54294e-06	8.63658e-06	103
GO:0008380	RNA splicing	174/3583	204/5118	1.84537e-07	1.31944e-05	1.19412e-05	174
GO:0006397	mRNA processing	197/3583	234/5118	2.32273e-07	1.5831e-05	1.43274e-05	197
GO:0010498	proteasomal protein catabolic process	105/3583	117/5118	2.33065e-07	1.5831e-05	1.43274e-05	105
GO:0034470	ncRNA processing	78/3583	84/5118	2.50574e-07	1.66051e-05	1.5028e-05	78
GO:0000375	RNA splicing, via transesterification reactions	163/3583	192/5118	8.79704e-07	5.68892e-05	5.1486e-05	163
GO:0044710	single-organism metabolic process	919/3583	1218/5118	9.00344e-07	5.68892e-05	5.1486e-05	919
GO:0000377	RNA splicing, via transesterification reactions with bulged adenosine as nucleophile	162/3583	191/5118	1.07988e-06	6.52006e-05	5.9008e-05	162
GO:0000398	mRNA splicing, via spliceosome	162/3583	191/5118	1.07988e-06	6.52006e-05	5.9008e-05	162
GO:0016568	chromatin modification	158/3583	186/5118	1.20444e-06	7.10969e-05	6.43443e-05	158
GO:0006302	double-strand break repair	38/3583	38/5118	1.22987e-06	7.10969e-05	6.43443e-05	38
GO:0043412	macromolecule modification	586/3583	760/5118	1.44121e-06	8.15787e-05	7.38306e-05	586
GO:0019538	protein metabolic process	983/3583	1310/5118	1.89232e-06	0.000104927	9.49617e-05	983
GO:0016043	cellular component organization	1224/3583	1649/5118	2.77561e-06	0.000150827	0.000136502	1224
GO:0044267	cellular protein metabolic process	912/3583	1214/5118	3.89653e-06	0.000207586	0.00018787	912
GO:0006996	organelle organization	863/3583	1147/5118	5.20977e-06	0.00027221	0.000246357	863
GO:0016569	covalent chromatin modification	103/3583	118/5118	7.04658e-06	0.000354547	0.000320874	103
GO:0016570	histone modification	103/3583	118/5118	7.04658e-06	0.000354547	0.000320874	103
GO:0006974	cellular response to DNA damage stimulus	198/3583	241/5118	7.45554e-06	0.000368304	0.000333323	198
GO:0022613	ribonucleoprotein complex biogenesis	90/3583	102/5118	9.98077e-06	0.000484245	0.000438253	90
GO:0000280	nuclear division	242/3583	300/5118	1.11757e-05	0.000532709	0.000482114	242
GO:0007346	regulation of mitotic cell cycle	141/3583	168/5118	1.82102e-05	0.000853054	0.000772033	141
GO:0032259	methylation	62/3583	68/5118	2.30005e-05	0.00105919	0.000958594	62
GO:0048285	organelle fission	249/3583	311/5118	2.40272e-05	0.00108803	0.000984694	249
GO:0010564	regulation of cell cycle process	136/3583	162/5118	2.50131e-05	0.00111411	0.00100829	136
GO:0006310	DNA recombination	52/3583	56/5118	2.93173e-05	0.00128476	0.00116274	52
GO:0006352	DNA-templated transcription, initiation	56/3583	61/5118	3.51503e-05	0.00151593	0.00137195	56
GO:0006464	cellular protein modification process	551/3583	723/5118	3.88192e-05	0.00158207	0.00143181	551
GO:0036211	protein modification process	551/3583	723/5118	3.88192e-05	0.00158207	0.00143181	551
GO:0006367	transcription initiation from RNA polymerase II promoter	51/3583	55/5118	3.91661e-05	0.00158207	0.00143181	51
GO:0044248	cellular catabolic process	321/3583	409/5118	3.93088e-05	0.00158207	0.00143181	321
GO:0006399	tRNA metabolic process	60/3583	66/5118	3.95954e-05	0.00158207	0.00143181	60
GO:1901362	organic cyclic compound biosynthetic process	506/3583	662/5118	4.9545e-05	0.00195092	0.00176563	506
GO:0009056	catabolic process	357/3583	459/5118	6.02675e-05	0.00233924	0.00211707	357
GO:0006325	chromatin organization	179/3583	220/5118	6.38679e-05	0.00244407	0.00221194	179
GO:0018130	heterocycle biosynthetic process	498/3583	652/5118	6.55543e-05	0.00247377	0.00223882	498
GO:0033554	cellular response to stress	356/3583	458/5118	6.80268e-05	0.0025319	0.00229143	356
GO:0019438	aromatic compound biosynthetic process	489/3583	640/5118	7.26142e-05	0.00266612	0.0024129	489
GO:0050789	regulation of biological process	1384/3583	1891/5118	7.63763e-05	0.00276686	0.00250407	1384
GO:0018193	peptidyl-amino acid modification	132/3583	159/5118	9.9278e-05	0.00354919	0.0032121	132
GO:0016579	protein deubiquitination	32/3583	33/5118	0.000113302	0.00399795	0.00361823	32
GO:1902582	single-organism intracellular transport	284/3583	362/5118	0.000118927	0.00414264	0.00374918	284
GO:0033044	regulation of chromosome organization	75/3583	86/5118	0.000139763	0.0047923	0.00433714	75
GO:0009058	biosynthetic process	917/3583	1237/5118	0.000141106	0.0047923	0.00433714	917
GO:0000075	cell cycle checkpoint	82/3583	95/5118	0.000152325	0.00510947	0.00462418	82
GO:0043414	macromolecule methylation	54/3583	60/5118	0.000194942	0.00645924	0.00584576	54
GO:0009059	macromolecule biosynthetic process	731/3583	979/5118	0.00020025	0.00655519	0.0059326	731
GO:0045930	negative regulation of mitotic cell cycle	84/3583	98/5118	0.000215504	0.00697054	0.0063085	84
GO:0046907	intracellular transport	321/3583	414/5118	0.000223651	0.00714895	0.00646997	321
GO:0034645	cellular macromolecule biosynthetic process	727/3583	974/5118	0.000226457	0.00715446	0.00647495	727
GO:0010948	negative regulation of cell cycle process	80/3583	93/5118	0.000236083	0.00737286	0.0066726	80
GO:0009451	RNA modification	35/3583	37/5118	0.00024958	0.00770578	0.00697391	35
GO:1901987	regulation of cell cycle phase transition	100/3583	119/5118	0.000280135	0.00845695	0.00765374	100
GO:1901990	regulation of mitotic cell cycle phase transition	100/3583	119/5118	0.000280135	0.00845695	0.00765374	100
GO:0051726	regulation of cell cycle	208/3583	262/5118	0.000295154	0.00881246	0.00797548	208
GO:0007399	nervous system development	769/3583	1034/5118	0.000307382	0.0090778	0.00821562	769
GO:0006888	ER to Golgi vesicle-mediated transport	34/3583	36/5118	0.000339309	0.00991294	0.00897144	34
GO:0018205	peptidyl-lysine modification	78/3583	91/5118	0.00036352	0.0105073	0.00950933	78
GO:0034654	nucleobase-containing compound biosynthetic process	465/3583	613/5118	0.000368139	0.0105288	0.00952878	465
GO:0046467	membrane lipid biosynthetic process	22/3583	22/5118	0.000384412	0.0107775	0.00975389	22
GO:0048869	cellular developmental process	1060/3583	1443/5118	0.000384769	0.0107775	0.00975389	1060
GO:0022008	neurogenesis	684/3583	917/5118	0.000417644	0.011579	0.0104792	684
GO:0044249	cellular biosynthetic process	884/3583	1197/5118	0.000471759	0.0129472	0.0117175	884
GO:0070647	protein modification by small protein conjugation or removal	154/3583	191/5118	0.000484811	0.0131723	0.0119212	154
GO:0007093	mitotic cell cycle checkpoint	73/3583	85/5118	0.000495116	0.0132361	0.0119789	73
GO:0070646	protein modification by small protein removal	42/3583	46/5118	0.0004969	0.0132361	0.0119789	42
GO:0098813	nuclear chromosome segregation	100/3583	120/5118	0.000528985	0.0139539	0.0126286	100
GO:1901988	negative regulation of cell cycle phase transition	76/3583	89/5118	0.000555962	0.0143862	0.0130198	76
GO:1901991	negative regulation of mitotic cell cycle phase transition	76/3583	89/5118	0.000555962	0.0143862	0.0130198	76
GO:0065007	biological regulation	1473/3583	2029/5118	0.000567542	0.0145473	0.0131656	1473
GO:0019222	regulation of metabolic process	781/3583	1054/5118	0.000586664	0.0148969	0.013482	781
GO:0045786	negative regulation of cell cycle	96/3583	115/5118	0.000603296	0.0151774	0.0137359	96
GO:0030154	cell differentiation	1027/3583	1400/5118	0.000699014	0.017424	0.0157692	1027
GO:1901576	organic substance biosynthetic process	887/3583	1204/5118	0.000787024	0.019265	0.0174353	887
GO:0016073	snRNA metabolic process	20/3583	20/5118	0.000787049	0.019265	0.0174353	20
GO:0032774	RNA biosynthetic process	404/3583	532/5118	0.000798739	0.0193766	0.0175362	404
GO:0046148	pigment biosynthetic process	31/3583	33/5118	0.000844922	0.0203155	0.018386	31
GO:0065003	macromolecular complex assembly	223/3583	285/5118	0.000857812	0.0204445	0.0185028	223
GO:0044772	mitotic cell cycle phase transition	110/3583	134/5118	0.000892537	0.0210871	0.0190844	110
GO:0042176	regulation of protein catabolic process	48/3583	54/5118	0.000902664	0.0211426	0.0191345	48
GO:0006351	transcription, DNA-templated	402/3583	530/5118	0.000969292	0.0223184	0.0201986	402
GO:0097659	nucleic acid-templated transcription	402/3583	530/5118	0.000969292	0.0223184	0.0201986	402
GO:0071702	organic substance transport	294/3583	382/5118	0.00100543	0.0229558	0.0207756	294
GO:0016482	cytoplasmic transport	178/3583	225/5118	0.00110645	0.0250519	0.0226726	178
GO:0043473	pigmentation	39/3583	43/5118	0.00112357	0.0252293	0.0228331	39
GO:0006950	response to stress	541/3583	723/5118	0.00116154	0.025868	0.0234111	541
GO:0007067	mitotic nuclear division	160/3583	201/5118	0.00117552	0.0259666	0.0235004	160
GO:0044770	cell cycle phase transition	111/3583	136/5118	0.00128474	0.0281502	0.0254766	111
GO:0006520	cellular amino acid metabolic process	75/3583	89/5118	0.00138099	0.0300173	0.0271663	75
GO:0043933	macromolecular complex subunit organization	513/3583	685/5118	0.00139756	0.0301363	0.0272741	513
GO:0008033	tRNA processing	29/3583	31/5118	0.0015393	0.0329314	0.0298036	29
GO:0042254	ribosome biogenesis	57/3583	66/5118	0.00155435	0.0329936	0.0298599	57
GO:0006479	protein methylation	41/3583	46/5118	0.00193734	0.0404904	0.0366447	41
GO:0008213	protein alkylation	41/3583	46/5118	0.00193734	0.0404904	0.0366447	41
GO:0045184	establishment of protein localization	216/3583	278/5118	0.00201748	0.0418434	0.0378692	216
GO:0015031	protein transport	210/3583	270/5118	0.00211615	0.0435126	0.0393799	210
GO:0031146	SCF-dependent proteasomal ubiquitin-dependent protein catabolic process	23/3583	24/5118	0.00212999	0.0435126	0.0393799	23
GO:0051783	regulation of nuclear division	48/3583	55/5118	0.00227509	0.0460346	0.0416624	48
GO:0000724	double-strand break repair via homologous recombination	17/3583	17/5118	0.00230427	0.0460346	0.0416624	17
GO:0000725	recombinational repair	17/3583	17/5118	0.00230427	0.0460346	0.0416624	17
GO:0044085	cellular component biogenesis	468/3583	625/5118	0.00235692	0.0467427	0.0423033	468
GO:0043543	protein acylation	55/3583	64/5118	0.00241428	0.0475334	0.0430188	55
