# Supplementary material for: The kinetics of pre-mRNA splicing in the Drosophila genome and the influence of gene architecture
Source: eLife. 2017 Dec 27;6:e32537. doi: 10.7554/eLife.32537 (PMC5762160; doi:10.7554/eLife.32537)
Supplement: Supplementary file 3. — Summary output from clusterProfiler for significantly enriched biological process gene ontology categories. [file elife-32537-supp3.xls]

## Sheet: SupplementaryTable3
Supplementary Table 3
ID	Description	GeneRatio	BgRatio	pvalue	p.adjust	qvalue	Count
GO:0009790	embryo development	30/197	329/5118	6.31825e-06	0.00561377	0.00479522	30
GO:0002009	morphogenesis of an epithelium	33/197	403/5118	2.07625e-05	0.00660649	0.0056432	33
GO:0016331	morphogenesis of embryonic epithelium	13/197	87/5118	2.27694e-05	0.00660649	0.0056432	13
GO:0048729	tissue morphogenesis	33/197	407/5118	2.54853e-05	0.00660649	0.0056432	33
GO:0000022	mitotic spindle elongation	12/197	76/5118	2.68661e-05	0.00660649	0.0056432	12
GO:0016310	phosphorylation	31/197	374/5118	3.02316e-05	0.00660649	0.0056432	31
GO:0009792	embryo development ending in birth or egg hatching	16/197	131/5118	3.50834e-05	0.00660649	0.0056432	16
GO:0051231	spindle elongation	12/197	78/5118	3.51484e-05	0.00660649	0.0056432	12
GO:0048598	embryonic morphogenesis	17/197	146/5118	3.71778e-05	0.00660649	0.0056432	17
GO:0032502	developmental process	102/197	1954/5118	5.28683e-05	0.00854063	0.00729532	102
GO:0080135	regulation of cellular response to stress	12/197	85/5118	8.40058e-05	0.0124399	0.010626	12
GO:0001700	embryonic development via the syncytial blastoderm	15/197	129/5118	0.000109865	0.0148653	0.0126978	15
GO:0044767	single-organism developmental process	100/197	1938/5118	0.000117115	0.0148653	0.0126978	100
GO:0007275	multicellular organismal development	88/197	1665/5118	0.000191432	0.0226783	0.0193715	88
GO:0006979	response to oxidative stress	10/197	67/5118	0.000207269	0.0230198	0.0196633	10
GO:0035239	tube morphogenesis	27/197	341/5118	0.000225479	0.0235692	0.0201325	27
GO:0006468	protein phosphorylation	23/197	272/5118	0.000264462	0.0235696	0.0201329	23
GO:0009653	anatomical structure morphogenesis	58/197	982/5118	0.000265539	0.0235696	0.0201329	58
GO:0035295	tube development	34/197	479/5118	0.000276592	0.0235696	0.0201329	34
GO:0046530	photoreceptor cell differentiation	14/197	125/5118	0.000278537	0.0235696	0.0201329	14
GO:0008219	cell death	21/197	239/5118	0.000294141	0.0237586	0.0202943	21
GO:0009888	tissue development	43/197	667/5118	0.000337526	0.0260776	0.0222752	43
GO:0016265	death	21/197	243/5118	0.00036923	0.0272272	0.0232572	21
GO:0009987	cellular process	166/197	3796/5118	0.00038305	0.0272272	0.0232572	166
GO:0060429	epithelium development	41/197	631/5118	0.000406348	0.0277723	0.0237228	41
GO:0006793	phosphorus metabolic process	39/197	594/5118	0.000469739	0.0303266	0.0259046	39
GO:0044707	single-multicellular organism process	92/197	1805/5118	0.000493009	0.0303266	0.0259046	92
GO:0002165	instar larval or pupal development	27/197	358/5118	0.000494918	0.0303266	0.0259046	27
GO:0060562	epithelial tube morphogenesis	25/197	323/5118	0.000552969	0.0313388	0.0267693	25
GO:0019220	regulation of phosphate metabolic process	16/197	166/5118	0.000579342	0.0313388	0.0267693	16
GO:0051174	regulation of phosphorus metabolic process	16/197	166/5118	0.000579342	0.0313388	0.0267693	16
GO:0048592	eye morphogenesis	17/197	183/5118	0.000599617	0.0313388	0.0267693	17
GO:0090596	sensory organ morphogenesis	17/197	183/5118	0.000599617	0.0313388	0.0267693	17
GO:0007391	dorsal closure	10/197	77/5118	0.000655841	0.0320995	0.0274191	10
GO:0009791	post-embryonic development	29/197	403/5118	0.0006578	0.0320995	0.0274191	29
GO:0045454	cell redox homeostasis	6/197	29/5118	0.000681841	0.0320995	0.0274191	6
GO:0006796	phosphate-containing compound metabolic process	38/197	585/5118	0.000694847	0.0320995	0.0274191	38
GO:0042325	regulation of phosphorylation	15/197	153/5118	0.000720112	0.0320995	0.0274191	15
GO:0048856	anatomical structure development	90/197	1774/5118	0.000722555	0.0320995	0.0274191	90
GO:0007552	metamorphosis	24/197	311/5118	0.000749226	0.0324725	0.0277377	24
GO:0012501	programmed cell death	19/197	222/5118	0.000798463	0.0335416	0.0286509	19
GO:0042981	regulation of apoptotic process	12/197	108/5118	0.00081839	0.0335416	0.0286509	12
GO:0046328	regulation of JNK cascade	7/197	41/5118	0.000830518	0.0335416	0.0286509	7
GO:0080134	regulation of response to stress	16/197	173/5118	0.000911981	0.0359412	0.0307006	16
GO:0007254	JNK cascade	8/197	54/5118	0.000947591	0.0359412	0.0307006	8
GO:0001932	regulation of protein phosphorylation	14/197	141/5118	0.000954694	0.0359412	0.0307006	14
GO:0007444	imaginal disc development	29/197	414/5118	0.00101558	0.0359412	0.0307006	29
GO:0030182	neuron differentiation	33/197	494/5118	0.00102072	0.0359412	0.0307006	33
GO:0010941	regulation of cell death	14/197	142/5118	0.00102379	0.0359412	0.0307006	14
GO:0031324	negative regulation of cellular metabolic process	24/197	319/5118	0.0010737	0.0359412	0.0307006	24
GO:0001745	compound eye morphogenesis	16/197	176/5118	0.00109792	0.0359412	0.0307006	16
GO:0032872	regulation of stress-activated MAPK cascade	7/197	43/5118	0.00111532	0.0359412	0.0307006	7
GO:0070302	regulation of stress-activated protein kinase signaling cascade	7/197	43/5118	0.00111532	0.0359412	0.0307006	7
GO:0000165	MAPK cascade	12/197	112/5118	0.00113264	0.0359412	0.0307006	12
GO:0023014	signal transduction by protein phosphorylation	12/197	112/5118	0.00113264	0.0359412	0.0307006	12
GO:0043066	negative regulation of apoptotic process	8/197	56/5118	0.00121124	0.0377609	0.032255	8
GO:0001654	eye development	19/197	232/5118	0.00135789	0.0403176	0.0344389	19
GO:0065008	regulation of biological quality	39/197	627/5118	0.0013594	0.0403176	0.0344389	39
GO:0051403	stress-activated MAPK cascade	8/197	57/5118	0.00136338	0.0403176	0.0344389	8
GO:0048699	generation of neurons	35/197	544/5118	0.00138606	0.0403176	0.0344389	35
GO:0007560	imaginal disc morphogenesis	22/197	288/5118	0.00143372	0.0403176	0.0344389	22
GO:0048563	post-embryonic organ morphogenesis	22/197	288/5118	0.00143372	0.0403176	0.0344389	22
GO:0042461	photoreceptor cell development	9/197	71/5118	0.00145207	0.0403176	0.0344389	9
GO:0031098	stress-activated protein kinase signaling cascade	8/197	59/5118	0.00171313	0.0457876	0.0391113	8
GO:0001751	compound eye photoreceptor cell differentiation	11/197	102/5118	0.00171992	0.0457876	0.0391113	11
GO:0034334	adherens junction maintenance	3/197	5118-07-01	0.00175301	0.0457876	0.0391113	3
GO:0045165	cell fate commitment	21/197	274/5118	0.00176786	0.0457876	0.0391113	21
GO:0044699	single-organism process	151/197	3432/5118	0.00177791	0.0457876	0.0391113	151
GO:0032501	multicellular organismal process	95/197	1947/5118	0.00189615	0.0471684	0.0402907	95
GO:0048468	cell development	52/197	923/5118	0.00189791	0.0471684	0.0402907	52
GO:0048513	organ development	46/197	790/5118	0.00191116	0.0471684	0.0402907	46
GO:0048569	post-embryonic organ development	24/197	333/5118	0.00193848	0.0471875	0.040307	24
GO:0007423	sensory organ development	22/197	296/5118	0.00203917	0.0489677	0.0418277	22
GO:0065007	biological regulation	98/197	2029/5118	0.0021446	0.0497899	0.04253	98
GO:0001754	eye photoreceptor cell differentiation	11/197	105/5118	0.00217507	0.0497899	0.04253	11
GO:0007010	cytoskeleton organization	32/197	496/5118	0.00217752	0.0497899	0.04253	32
GO:0016567	protein ubiquitination	13/197	137/5118	0.00218549	0.0497899	0.04253	13
